# Supplementary material for: Targeting of Tumor Neovasculature with GrB/VEGF121, a Novel Cytotoxic Fusion Protein
Source: Biomedicines. 2017 Jul 17;5(3):42. doi: 10.3390/biomedicines5030042 (PMC5618300; doi:10.3390/biomedicines5030042)
Supplement: Supplementary file 1 [file biomedicines-05-00042-s001.xlsx]

## Sheet: Table S1
		Table S1: Interventional or observational Clinical Trials of vascular agents in Oncology from 1/1/2010 to 5/1/2017
	Phase	Title	Conditions	Interventions	Sponsor/Collaborators		Study Types	URL
	Phase 4	Recombinant Human Endostatin Combined With NP in Neoadjuvant Chemotherapy of Stage IIIA NSCLC	Non Small Cell Lung Cancer	Drug: Endostatin|Drug: Vinorelbine|Drug: Cisplatin	Tianjin Medical University Cancer Institute and Hospital		Interventional	https://ClinicalTrials.gov/show/NCT02497118
	Phase 4	VEG113971: An Open-Label Study of the Effects of Ketoconazole or Esomeprazole on Pazopanib PK	Cancer	Drug: pazopanib	GlaxoSmithKline		Interventional	https://ClinicalTrials.gov/show/NCT01205230
	Phase 4	Open-label Study in Patients With Metastatic NSLC Treated With Cisplatin, Gemcitabine and Bevacizumab	Non-Small Cell Lung Cancer (NSCLC)	Drug: gemcitabine, cisplatin and bevacizumab	Fundacion Clinic per a la Recerca Biomédica		Interventional	https://ClinicalTrials.gov/show/NCT02316327
	Phase 4	Assessment of the Effects of Pressors on Graft Blood Flow After Free Tissue Transfer Surgery	Oral Cancer|Head and Neck Cancer|Free Flap|Hypotension	Drug: Epinephrine|Drug: Norepinephrine|Drug: Dobutamine|Drug: Dopexamine	Oxford University Hospitals NHS Trust		Interventional	https://ClinicalTrials.gov/show/NCT01418118
	Phase 4	Oxaliplatin and Raltitrexed Treatment of Colorectal Cancer With Liver Metastases	Colon Cancer Liver Metastasis	Drug: oxaliplatin and raltitrexed	Zhu Xu|Beijing Cancer Hospital		Interventional	https://ClinicalTrials.gov/show/NCT02557490
	Phase 4	Study of Concurrent Chemo-radiotherapy Combined With Recombinant Human Endostatin for Local Advanced Non-small Cell Lung Cancer (NSCLC)	Non-small Cell Lung Cancer	Radiation: radiotherapy combined with EP|Drug: radiotherapy / EP combined with recombinant human endostatin	Simcere Pharmaceutical Co., Ltd|Daping Hospital and the Research Institute of Surgery of the Third Military Medical University		Interventional	https://ClinicalTrials.gov/show/NCT01211002
	Phase 4	Quantitative Subharmonic Breast Imaging	Breast Cancer	Drug: 3D HI and SHI of UCA	Thomas Jefferson University|National Cancer Institute (NCI)|Lantheus Medical Imaging|University of California, San Diego		Interventional	https://ClinicalTrials.gov/show/NCT01490892
	Phase 4	HCV-RNA Kinetics During Sorafenib for Hepatocellular Carcinoma (HCC)	Hepatocellular Cancer	Drug: Sorafenib	Massachusetts General Hospital		Interventional	https://ClinicalTrials.gov/show/NCT01849588
	Phase 4	Yellow 560 Microscope for Intraoperative Visualization of Fluorescein Stained Intracranial Lesions	Cerebrovascular Disorders|Intracranial Neoplasms	Drug: Fluorescein Sodium	Florida Hospital		Interventional	https://ClinicalTrials.gov/show/NCT02478346
	Phase 4	The Impact of Preoperative Oral Glutamine Intake on the Immunocompetence and Outcomes of Malnourished Patients Undergoing Major Abdominal Surgery Due to Malignancies	Malnourishment|Gastrointestinal Tumors	Dietary Supplement: Glutamine|Drug: Placebo	University Hospital Inselspital, Berne|Fresenius Kabi		Interventional	https://ClinicalTrials.gov/show/NCT01552291
	Phase 4	Decreasing Postoperative Complications by Goal-Directed Fluid Therapy During Esophageal Resection	Esophageal Cancer	Other: fluid optimisation	University Hospital, Linkoeping		Interventional	https://ClinicalTrials.gov/show/NCT01416077
	Phase 4	Etanercept in Rheumatoid Arthritis and Vascular Inflammation	Rheumatoid Arthritis|Vascular Inflammation	Drug: etanercept	Innovaderm Research Inc.		Interventional	https://ClinicalTrials.gov/show/NCT02109289
	Phase 4	Atherosclerosis in High Risk Population Groups: An Assessment by Magnetic Resonance Imaging	Atherosclerosis	Drug: Rosuvastatin|Behavioral: Lifestyle modification	Emory University		Interventional	https://ClinicalTrials.gov/show/NCT02114697
	Phase 4	Apixaban as Treatment of Venous Thrombosis in Patients With Cancer: The CAP Study	Neoplasms|Venous Thrombosis	Drug: Apixaban	University Hospital, Akershus		Interventional	https://ClinicalTrials.gov/show/NCT02581176
	Phase 4	TACE and MWA Combination Therapy in Early-stage Hepatocellular Carcinoma	Hepatocellular Carcinoma|Hepatoma|Liver Cancer, Adult|Liver Cell Carcinoma|Liver Cell Carcinoma, Adult	Procedure: Transarterial Chemoembolization|Procedure: Microwave Ablation	Carolinas Medical Center		Interventional	https://ClinicalTrials.gov/show/NCT02704130
	Phase 4	Evaluation of Lipiodol Ultra Fluid in Association With Surgical Glues During Vascular Embolization.	Congenital Hemangioma|Hemangioendothelioma|Angiosarcoma|Arteriovenous Malformation	Drug: LipiodolÂ® Ultra Fluid with surgical glues	Guerbet		Interventional	https://ClinicalTrials.gov/show/NCT02625389
	Phase 4	Effect of Pioglitazone on TIMP-3 and TACE in Type 2 Diabetes	Type 2 Diabetes	Drug: Pioglitazone|Drug: Placebo	The University of Texas Health Science Center at San Antonio		Interventional	https://ClinicalTrials.gov/show/NCT01223196
	Phase 4	Efficacy and Safety of Drug Eluting Beads TACE in Treatment of HCC in Egyptian Patients	HepatoCellular Carcinoma	Drug: Trans-arterial chemoembolization (TACE)|Drug: TACE with Drug Eluting Beads procedure	Ain Shams University		Interventional	https://ClinicalTrials.gov/show/NCT03007225
	Phase 4	Study in Cancer Patients With Central Line Associated Clots in the Upper Extremity Treated With Rivaroxaban (Catheter 2)	Neoplasm|Central Venous Catheter Thrombosis	Drug: Rivaroxaban	London Health Sciences Centre		Interventional	https://ClinicalTrials.gov/show/NCT01708850
	Phase 4	Synergistic Treatment for Hepatocellular Carcinoma (HCC) Using Transcatheter Arterial Chemoembolization (TACE) With Anti-hepatitis B Virus (Anti-HBV) Therapy	Hepatocellular Carcinoma	Procedure: Transcatheter arterial chemoembolization (TACE)|Drug: Telbivudine	Fudan University		Interventional	https://ClinicalTrials.gov/show/NCT01102335
	Phase 4	Rivaroxaban for the Prevention of Venous Thromboembolism in Asian Patients With Cancer	Rivaroxaban|Cancer-associated Thrombosis|Recurrence|Bleeding	Drug: Rivaroxaban	Seoul National University Hospital|Korean Society of Hematology Thrombosis Working Party		Interventional	https://ClinicalTrials.gov/show/NCT01989845
	Phase 4	Intravenous Paricalcitol in Chronic Hemodialysis Patients	Endstage Renal Disease|Secondary Hyperparathyroidism	Drug: Intravenous Paricalcitol	The University of Hong Kong|AbbVie		Interventional	https://ClinicalTrials.gov/show/NCT03023748
	Phase 4	Effects of the TNF-alpha Inhibiton on Hemodynamic Parameters in Resistant Hypertension	Hypertension	Biological: Infliximab|Other: Saline	University of Campinas, Brazil		Interventional	https://ClinicalTrials.gov/show/NCT02743390
	Phase 4	Comparison of Thromboembolic Events Between Enoxa and Lovenox in Patients Undergoing Digestive Cancer	Digestive System Neoplasms|Enoxaparin	Drug: Enoxaparin 4000 UI	Les Laboratoires des Médicaments Stériles		Interventional	https://ClinicalTrials.gov/show/NCT02444572
	Phase 4	Study to Show a Superior Benefit in Terms of Reduction of Ranibizumab Injections in Patients Receiving Ranibizumab Plus Laser Photocoagulation Combination Therapy Without Loss of Efficacy and Safety	Macular Edema Secondary to Branch Retinal Vein Occlusion (BRVO)	Biological: Ranibizumab|Radiation: Grid&Direct short pulse laser photocoagulation	Novartis Pharmaceuticals|Novartis		Interventional	https://ClinicalTrials.gov/show/NCT02953938
	Phase 4	Cancer Venous Thromboembolism (VTE)	Venous Thromboembolism (VTE)|Deep Vein Thrombosis (DVT)|Pulmonary Embolism (PE)|Cancer	Drug: edoxaban|Drug: Dalteparin	Daiichi Sankyo Inc.		Interventional	https://ClinicalTrials.gov/show/NCT02073682
	Phase 4	Cinacalcet stUdy for Peritoneal Dialysis Patients In Double Arm on the Lowing Effect OF iPTH Level	Secondary Hyperparathyroidism	Drug: cinacalcet|Drug: control	Seoul National University Hospital|Jeil-Kirin Pharmaceutical Inc.		Interventional	https://ClinicalTrials.gov/show/NCT01101113
	Phase 4	LIPT - Liraglutide in Polycystic Ovary Syndrome	Polycystic Ovary Syndrome|Cardiovascular Disease	Drug: Liraglutide|Drug: placebo	Jens Faber|Herlev Hospital		Interventional	https://ClinicalTrials.gov/show/NCT02073929
	Phase 4	Hepatic Resection Versus Transcatheter Arterial Chemoembolization for Hepatocellular Carcinoma Complicated by Portal Vein Tumor Thrombosis	Hepatocellular Carcinoma With PVTT	Procedure: hepatic resection|Procedure: TACE	Sun Yat-sen University		Interventional	https://ClinicalTrials.gov/show/NCT01350206
	Phase 4	The Safety and Efficiency of Propranolol as an Initial Treatment for Pediatric Hemangioma	Hemangioma	Drug: Prednisolone|Drug: Propranolol	Seoul National University Hospital		Interventional	https://ClinicalTrials.gov/show/NCT01908972
	Phase 4	Levobupivacaine and Lidocaine for Paravertebral Block Causes Greater Hemodynamic Oscillations Than Levobupivacaine	Breast Tumors|Hypotension|Bradycardia	Drug: levobupivacaine	University Hospital Dubrava		Interventional	https://ClinicalTrials.gov/show/NCT02004834
	Phase 4	Pharmacological Manipulation of Intrahepatic Arterial Blood Flow in HCC	Hepatocellular Carcinoma	Radiation: CT perfusion|Drug: Norepinephrine intra-arteriel/hepatic	University Health Network, Toronto		Interventional	https://ClinicalTrials.gov/show/NCT02472249
	Phase 4	A Safety Trial of Nivolumab in Patients With Advanced or Metastatic Renal Cell Carcinoma	Renal Cell Carcinoma	Drug: Nivolumab	Bristol-Myers Squibb		Interventional	https://ClinicalTrials.gov/show/NCT02596035
	Phase 4	Outcome-related Factors in Patients With Metastatic Renal Cell Carcinoma Treated With Everolimus (ORCHIDEE)	Renal Cell Carcinoma	Drug: Everolimus	Mario Negri Institute for Pharmacological Research		Interventional	https://ClinicalTrials.gov/show/NCT02338570
	Phase 4	The Effect of Dipeptidyl Peptidase 4 Inhibition on Growth Hormone Secretion in Women With Polycystic Ovarian Syndrome	Polycystic Ovary Syndrome	Drug: Sitagliptin|Drug: Placebo	Vanderbilt University|National Heart, Lung, and Blood Institute (NHLBI)		Interventional	https://ClinicalTrials.gov/show/NCT02122380
	Phase 4	Safety of Low Dose IV Contrast CT Scanning in Chronic Kidney Disease	Chronic Kidney Disease|Pulmonary Embolism|Renal Artery Stenosis|Pulmonary Cancer	Drug: Low Volume iso-osmolar non-ionic radio contrast medium|Drug: Acetylcysteine Inhalation|Drug: Sodium Bicarbonate Solution|Procedure: 64-MDCT Scanning	VA Greater Los Angeles Healthcare System|General Electric		Interventional	https://ClinicalTrials.gov/show/NCT02476526
	Phase 4	A Study of PAD Versus Velcade, Cyclophosphamide and Dexamethasone (VCD) Treatment in Subjects With Multiple Myeloma	Multiple Myeloma	Drug: PAD|Drug: VCD|Other: ASCT	Peking University People's Hospital		Interventional	https://ClinicalTrials.gov/show/NCT01868828
	Phase 4	Outcome of Transarterial Chemo-embolization (TACE) in Hepatocellular Carcinoma Patients With Partial Portal Vein Thrombosis	Hepatocellular Carcinoma (HCC)	Procedure: transarterial chemoembolization versus the standard treatment with sorafinib	Ain Shams University		Interventional	https://ClinicalTrials.gov/show/NCT03007212
	Phase 4	Dose Titration of Lisinopril in Children Aged 1 to 18 Years With Primary or Secondary Hypertension	Primary Hypertension|Secondary Hypertension	Drug: lisinopril, ACE-inhibitor	University Ghent		Interventional	https://ClinicalTrials.gov/show/NCT02184858
	Phase 4	Ferric Carboxymaltose for Treatment of Anaemia of Cancer in Subjects With Multiple Myeloma Receiving Chemotherapy	Iron-Deficiency Anemia	Drug: Ferric carboxymaltose	Vifor Inc.		Interventional	https://ClinicalTrials.gov/show/NCT01100879
	Phase 4	A Pharmacokinetic Study of Bortezomib in Taiwanese Participants With Multiple Myeloma	Multiple Myeloma	Drug: Bortezomib	Johnson & Johnson Taiwan Ltd		Interventional	https://ClinicalTrials.gov/show/NCT02268890
	Phase 4	Efficacy Study of PAD and TAD in Newly Diagnosed Multiple Myeloma	Multiple Myeloma	Drug: Bortezomib,Pirarubicin,Dexamethasone|Drug: Thalidomide,Pirarubicin,Dexamethasone	Second Military Medical University|Zhejiang University|Peking University People's Hospital|Fourth Military Medical University|Xiangya Hospital of Central South University|Institute of Hematology & Blood Diseases Hospital|Union hospital of Fujian Medical University|Harbin Hematology and Oncology Institute|First Affiliated Hospital, Sun Yat-Sen University|Beijing Jishuitan Hospital		Interventional	https://ClinicalTrials.gov/show/NCT01249690
	Phase 4	PDD vs PAD to Treat Initially Diagnosed MM	Multiple Myeloma	Drug: Chemotherapy with PDD regimen|Drug: Chemotherapy with PAD regimen	The First Affiliated Hospital of Soochow University		Interventional	https://ClinicalTrials.gov/show/NCT02577783
	Phase 4	Zoledronic Acid in Patients With Multiple Myeloma and Asymptomatic Biochemical Relapse	Multiple Myeloma	Drug: zoledronic acid|Other: No treatment control	PETHEMA Foundation|Dynamic Solutions|Novartis		Interventional	https://ClinicalTrials.gov/show/NCT01087008
	Phase 4	PREvention of VENous ThromboEmbolism Following Radical Prostatectomy	Prostate Cancer|Venous Thromboembolism|Lymphocele After Surgical Procedure|Deep Venous Thrombosis|Pulmonary Embolism	Drug: Subcutaneous Heparin	Johns Hopkins University		Interventional	https://ClinicalTrials.gov/show/NCT03006562
	Phase 4	Metformin and Folate in Pregnant Polycystic Ovary Syndrome(PCOS) Women	Pregnancy|Polycystic Ovary Syndrome	Drug: metformin plus placebo|Drug: Metformin plus folic acid|Drug: placebo plus folic acid|Drug: placebo alone	University Magna Graecia		Interventional	https://ClinicalTrials.gov/show/NCT01115140
	Phase 4	A Pilot Study of Hemoporfin PDT in Children With Port-wine Stain	Port-wine Stain	Drug: Hemoporfin PDT	Shanghai Fudan-Zhangjiang Bio-Pharmaceutical Co.,Ltd.		Interventional	https://ClinicalTrials.gov/show/NCT03125057
	Phase 4	Prolonged Protection From Bone Disease in Multiple Myeloma	Multiple Myeloma	Drug: Zoledronic acid	Thomas Lund|Odense University Hospital		Interventional	https://ClinicalTrials.gov/show/NCT02286830
	Phase 4	Efficacy of Panobinostat in Patients With Relapsed and Bortezomib-refractory Multiple Myeloma	Relapsed and Bortezomib Refractory Multiple Myeloma|Refractory Multiple Myeloma|Multiple Myeloma in Relapse	Drug: panobinostat|Drug: bortezomib|Drug: dexamethasone	Novartis Pharmaceuticals|Novartis		Interventional	https://ClinicalTrials.gov/show/NCT01083602
	Phase 4	Treatment With a Scheme With Low Doses of Bortezomib / Melphalan / Prednisone (MPV) in Patients With Multiple Myeloma	Multiple Myeloma	Drug: Bortezomib|Drug: Melphalan|Drug: Prednisone	Basque Health Service		Interventional	https://ClinicalTrials.gov/show/NCT02773550
	Phase 4	Lenalidomide and Dexamethasone With/Without Stem Cell Transplant in Patients With Multiple Myeloma	Multiple Myeloma	Procedure: Autologous peripheral blood stem cell transplant|Drug: Lenalidomide|Drug: Dexamethasone|Procedure: Stem Cell Mobilization	Columbia University		Interventional	https://ClinicalTrials.gov/show/NCT01731886
	Phase 4	Apixaban for Primary Prevention of Venous Thromboembolism in Patients With Multiple Myeloma	Venous Thromboembolism|Multiple Myeloma	Drug: Apixaban|Drug: Placebo Oral Tablet	Brigham and Women's Hospital|Bristol-Myers Squibb		Interventional	https://ClinicalTrials.gov/show/NCT02958969
	Phase 4	Comparison of Efficacy Different Treatment Regimens in Pulmonary Hypertension Secondary to Lung Disease and or Hypoxia	Pulmonary Hypertension Secondary to Lung Disease and/or Hypoxia	Drug: Sildenafil|Drug: Bosentan	All India Institute of Medical Sciences, New Delhi		Interventional	https://ClinicalTrials.gov/show/NCT01449253
	Phase 4	Modified Bortezomib-based Combination Therapy for Multiple Myeloma	Multiple Myeloma	Drug: Bortezomib|Drug: Dexamethasone|Drug: Doxorubicin|Drug: Cyclophosphamide|Drug: Mitoxsnteone|Drug: Thalidomide	Shanghai General Hospital, Shanghai Jiao Tong University School of Medicine		Interventional	https://ClinicalTrials.gov/show/NCT02559154
	Phase 4	Effect of Dexmedetomidine Combined With Sufentanil for Postoperative Intravenous Analgesia in Neurosurgery	Arteriovenous Malformation	Drug: Sufentanil|Drug: dexmedetomidine 1|Drug: dexmedetomidine 2|Drug: dexmedetomidine 3	First Affiliated Hospital, Sun Yat-Sen University		Interventional	https://ClinicalTrials.gov/show/NCT02552459
	Phase 4	The Comparison of RCD Versus BCD in Newly Diagnosed Waldenström Macroglobulinemia	Waldenström Macroglobulinemia	Drug: Bortezomib|Drug: Rituximab	Institute of Hematology & Blood Diseases Hospital		Interventional	https://ClinicalTrials.gov/show/NCT02844322
	Phase 4	The Efficacy of TCD Following by TP Maintenance Therapy in Newly Diagnosed WM	Waldenström Macroglobulinemia	Drug: Thalidomide	Institute of Hematology & Blood Diseases Hospital		Interventional	https://ClinicalTrials.gov/show/NCT02844309
	Phase 4	Role of Parecoxib Sodium for Postoperative Pain Management in Open Hepatectomy	Hepatic Hemangioma Located in the Right Liver|Laparotomy Surgery	Drug: Parecoxib Sodium	Peking Union Medical College Hospital		Interventional	https://ClinicalTrials.gov/show/NCT02204878
	Phase 4	Primary Prevention of Patients With Hepatocellular Carcinoma and Concomitant Esophageal Varices	Bleeding Esophageal Varices|Hepatocellular Carcinoma	Drug: Propranolol|Procedure: Esophageal variceal ligation	Taipei Veterans General Hospital, Taiwan		Interventional	https://ClinicalTrials.gov/show/NCT01970748
	Phase 4	An Observational Study of Chinese Multiple Myeloma Patients Treated With Velcade	Multiple Myeloma	Drug: No intervention	Xian-Janssen Pharmaceutical Ltd.		Observational	https://ClinicalTrials.gov/show/NCT01675245
	Phase 3	Efficacy,Safety and Quality of Life After TOOKAD Soluble VTP for Localized Prostate Cancer	Prostate Cancer	Drug: TOOKAD Soluble	Steba Biotech S.A.		Interventional	https://ClinicalTrials.gov/show/NCT01875393
	Phase 3	Application of Two Anti-angiogenesis Drugs Combined With Chemotherapy in Advanced Colorectal Cancer Under the Background of Precision Medical	Colorectal Neoplasms	Drug: Two Anti-angiogenesis Drugs (Endostar and Thalidomide)|Drug: Pure chemotherapy (Xelox)	The First People's Hospital of Hefei|Anhui Cancer Hospital|Anhui Jimin Cancer Hospital|Simcere Pharmaceutical Co., Ltd		Interventional	https://ClinicalTrials.gov/show/NCT02748772
	Phase 3	Efficacy of Apatinib in Radioactive Iodine-refractory Differentiated Thyroid Cancer	Differentiated Thyroid Cancer	Drug: Apatinib Oral Tablet|Drug: Placebo Oral Tablet	Peking Union Medical College Hospital		Interventional	https://ClinicalTrials.gov/show/NCT03048877
	Phase 3	A Trial of Endostar in Combination With Chemotherapy of DF and Sequential Intensity Modulated Radiation Therapy for Patients With Advanced Nasopharyngeal Carcinoma	Nasopharyngeal Neoplasms	Drug: endostar|Radiation: intensity modulated radiation|Drug: cisplatin	China Three Gorges University, Yichang, China		Interventional	https://ClinicalTrials.gov/show/NCT02444949
	Phase 3	Apatinib in the Treatment of Advanced Non-squamous Non-small Cell Lung Cancer	Non-small Cell Lung Cancer	Drug: apatinib|Drug: placebo	Sun Yat-sen University		Interventional	https://ClinicalTrials.gov/show/NCT01287962
	Phase 3	Phase III Study of Apatinib Tablets in the Treatment of Advanced or Metastatic Gastric Cancer	Advanced or Metastatic Gastric Cancer	Drug: apatinib|Drug: placebo	Jiangsu HengRui Medicine Co., Ltd.|Fudan University|The 81 Hospital of PLA		Interventional	https://ClinicalTrials.gov/show/NCT01512745
	Phase 3	Efficacy and Safety Study of TOOKAD Soluble for Localised Prostate Cancer Compared to Active Surveillance.	Prostate Cancer	Drug: TOOKAD Soluble	Steba Biotech S.A.		Interventional	https://ClinicalTrials.gov/show/NCT01310894
	Phase 3	Cancer Associated Thrombosis, a Pilot Treatment Study Using Rivaroxaban	Neoplasm|Venous Thromboembolism	Drug: rivaroxaban|Drug: Low-molecular-weight heparin	Assistance Publique - Hôpitaux de Paris|Bayer		Interventional	https://ClinicalTrials.gov/show/NCT02746185
	Phase 3	Olaparib or Cediranib Maleate and Olaparib Compared With Standard Platinum-Based Chemotherapy in Treating Patients With Recurrent Platinum-Sensitive Ovarian, Fallopian Tube, or Primary Peritoneal Cancer	Deleterious BRCA1 Gene Mutation|Deleterious BRCA2 Gene Mutation|Endometrial Undifferentiated Carcinoma|Fallopian Tube Clear Cell Adenocarcinoma|Fallopian Tube Transitional Cell Carcinoma|Ovarian Clear Cell Adenocarcinoma|Ovarian Endometrioid Tumor|Ovarian Seromucinous Carcinoma|Ovarian Serous Tumor|Ovarian Transitional Cell Carcinoma|Recurrent Fallopian Tube Carcinoma|Recurrent Ovarian Carcinoma|…	Drug: Carboplatin|Drug: Cediranib Maleate|Drug: Gemcitabine Hydrochloride|Other: Laboratory Biomarker Analysis|Drug: Olaparib|Drug: Paclitaxel|Drug: Pegylated Liposomal Doxorubicin Hydrochloride|Other: Pharmacological Study|Other: Quality-of-Life Assessment	National Cancer Institute (NCI)|AstraZeneca		Interventional	https://ClinicalTrials.gov/show/NCT02446600
	Phase 3	Study of Apatinib as 3rd/4th Line Treatment in Patients With Advanced Non-Squamous Non-small Cell Lung Cancer Harboring Wild-type Epidermal Growth Factor Receptor (EGFR)	Carcinoma, Non-Small-Cell Lung	Drug: Apatinib|Drug: Placebo	Jiangsu HengRui Medicine Co., Ltd.		Interventional	https://ClinicalTrials.gov/show/NCT02332512
	Phase 3	Impact of a Surgical Sealing Patch on Lymphatic Drainage After ALND for Breast Cancer	Breast Cancer	Drug: TachoSil patches	Swiss Group for Clinical Cancer Research		Interventional	https://ClinicalTrials.gov/show/NCT02311543
	Phase 3	Serum Protein Research Substudy	Breast Cancer	Drug: Cyclophosphamide|Drug: Doxorubicin hydrochloride|Drug: Epirubicin hydrochloride|Drug: Fluorouracil|Drug: Methotrexate|Procedure: Adjuvant therapy|Drug: Docetaxel|Drug: Paclitaxel	International Breast Cancer Study Group		Interventional	https://ClinicalTrials.gov/show/NCT02393833
	Phase 3	TRINOVA-1: A Study of AMG 386 or Placebo, in Combination With Weekly Paclitaxel Chemotherapy, as Treatment for Ovarian Cancer, Primary Peritoneal Cancer and Fallopian Tube Cancer	Fallopian Tube Cancer|Ovarian Cancer|Primary Peritoneal Cancer	Drug: AMG 386|Drug: AMG 386 Placebo|Drug: Paclitaxel|Drug: Paclitaxel	Amgen		Interventional	https://ClinicalTrials.gov/show/NCT01204749
	Phase 3	Study To Evaluate the Efficacy and Safety Of Bevacizumab, and Associated Biomarkers, In Combination With Paclitaxel Compared With Paclitaxel Plus Placebo as First-line Treatment Of Patients With Her2-Negative Metastatic Breast Cancer	Metastatic Breast Cancer	Drug: Bevacizumab [Avastin]|Drug: Paclitaxel|Drug: Placebo	Hoffmann-La Roche		Interventional	https://ClinicalTrials.gov/show/NCT01663727
	Phase 3	Mannitol Use During Partial Nephrectomy Prior to Renal Ischemia and Impact on Renal Function Outcomes	Renal Cancer	Drug: mannitol|Other: placebo	Memorial Sloan Kettering Cancer Center		Interventional	https://ClinicalTrials.gov/show/NCT01606787
	Phase 3	Interest of Indocyanine Green in Neoplastic Prostatic Tissue	Prostatic Neoplasms	Drug: indocyanine green infusion	Centre Hospitalier Universitaire de Saint Etienne		Interventional	https://ClinicalTrials.gov/show/NCT02260349
	Phase 3	E10A for the Treatment of Squamous Cell Carcinoma of the Head and Neck	Head and Neck Neoplasms	Drug: Endostatins|Drug: Paclitaxel injection|Drug: Cisplatin injection	Guangzhou Double Bioproducts Co., Ltd		Interventional	https://ClinicalTrials.gov/show/NCT02630264
	Phase 3	A Study of Paclitaxel With or Without Ramucirumab (LY3009806) in Participants With Gastric or Gastroesophageal Cancer	Gastroesophageal Junction Adenocarcinoma|Gastric Adenocarcinoma	Drug: Ramucirumab|Drug: Paclitaxel|Drug: Placebo	Eli Lilly and Company		Interventional	https://ClinicalTrials.gov/show/NCT02898077
	Phase 3	Simultaneous Study of Gemcitabine-Docetaxel Combination Adjuvant Treatment, as Well as Extended Bisphosphonate and Surveillance-Trial	Breast Neoplasms	Drug: FEC-DocGemzar adjuvant chemotherapy|Drug: FEC-Doc adjuvant chemotherapy|Drug: Zoledronic acid i.v. 2 years|Drug: Zoledronic acid i.v. 5 years	Ludwig-Maximilians - University of Munich|AstraZeneca|Chugai Pharma USA|Eli Lilly and Company|Novartis|Sanofi|Janssen Diagnostics, LLC		Interventional	https://ClinicalTrials.gov/show/NCT02181101
	Phase 3	Transarterial Chemoembolization Compared With Stereotactic Body Radiation Therapy or Stereotactic Ablative Radiation Therapy in Treating Patients With Residual or Recurrent Liver Cancer Undergone Initial Transarterial Chemoembolization	Child-Pugh Class A|Child-Pugh Class B|Recurrent Hepatocellular Carcinoma	Procedure: Computed Tomography|Other: Laboratory Biomarker Analysis|Procedure: Magnetic Resonance Imaging|Other: Quality-of-Life Assessment|Other: Questionnaire Administration|Radiation: Stereotactic Body Radiation Therapy|Procedure: Transarterial Chemoembolization|Drug: Chemotherapy agent|Drug: embolic agent|Drug: lipiodol	Stanford University|National Cancer Institute (NCI)		Interventional	https://ClinicalTrials.gov/show/NCT02762266
	Phase 3	Postoperative Bleeding Prevention in Massive Bone Tumour Resection	Blood Loss|Bone Tumour	Drug: Tranexamic Acid|Drug: Fibrin glue|Procedure: Electrocauterization	Fundació Institut de Recerca de l'Hospital de la Santa Creu i Sant Pau		Interventional	https://ClinicalTrials.gov/show/NCT02153593
	Phase 3	Paclitaxel and Carboplatin With or Without Bevacizumab in Treating Patients With Stage II, Stage III, or Stage IV Ovarian Epithelial Cancer, Primary Peritoneal Cancer, or Fallopian Tube Cancer	Fallopian Tube Endometrioid Adenocarcinoma|Fallopian Tube Mucinous Adenocarcinoma|Fallopian Tube Transitional Cell Carcinoma|Malignant Ovarian Mixed Epithelial Tumor|Ovarian Brenner Tumor|Ovarian Clear Cell Adenocarcinofibroma|Ovarian Endometrioid Adenocarcinoma|Ovarian Mucinous Adenocarcinoma|Ovarian Serous Adenocarcinoma|Ovarian Transitional Cell Carcinoma|Primary Peritoneal Serous Adenocarcino…	Biological: Bevacizumab|Drug: Carboplatin|Procedure: Computed Tomography|Drug: Paclitaxel|Procedure: Therapeutic Conventional Surgery	National Cancer Institute (NCI)		Interventional	https://ClinicalTrials.gov/show/NCT01167712
	Phase 3	A Study to Evaluate the Efficacy and Safety of Rivaroxaban Venous Thromboembolism (VTE) Prophylaxis in Ambulatory Cancer Participants	Neoplasms	Drug: Rivaroxaban|Drug: Placebo	Janssen Research & Development, LLC|Bayer		Interventional	https://ClinicalTrials.gov/show/NCT02555878
	Phase 3	Rivaroxaban in the Treatment of Venous Thromboembolism (VTE) in Cancer Patients	Venous Thromboembolism|Cancer	Drug: Rivaroxaban|Drug: low-molecular heparine	AIO-Studien-gGmbH|Charite University, Berlin, Germany|Bayer		Interventional	https://ClinicalTrials.gov/show/NCT02583191
	Phase 3	The Efficacy and Safety of the Postoperative Adjuvant Treatment in Patients With High-risk Stage I Endometrial Carcinoma	Endometrial Neoplasms	Drug: Paclitaxel|Drug: Paraplatin (Carboplatin Injection)|Radiation: Pelvic Radiation|Radiation: Vaginal Brachytherapy 1|Radiation: Vaginal brachytherapy 2	Ding Ma|Shandong University|Huazhong University of Science and Technology|Zhejiang University		Interventional	https://ClinicalTrials.gov/show/NCT01820858
	Phase 3	A Study of Avastin (Bevacizumab) Versus Placebo in Combination With Carboplatin/Paclitaxel) in Patients With Advanced or Recurrent Non-Squamous Non-Small Cell Lung Cancer Who Have Not Received Previous Chemotherapy	Non-Squamous Non-Small Cell Lung Cancer	Drug: bevacizumab [Avastin]|Drug: carboplatin|Drug: paclitaxel|Drug: placebo	Hoffmann-La Roche		Interventional	https://ClinicalTrials.gov/show/NCT01364012
	Phase 3	Long-Term Innohep Treatment Versus a Vitamin K Antagonist (Warfarin) for the Treatment of Venous Thromboembolism (VTE) in Cancer	Venous Thromboembolism	Drug: Warfarin|Drug: Innohep	LEO Pharma		Interventional	https://ClinicalTrials.gov/show/NCT01130025
	Phase 3	Apixaban for the Treatment of Venous Thromboembolism in Patients With Cancer	Venous Thromboembolism	Drug: Apixaban|Drug: Dalteparin	Fadoi Foundation, Italy|University of Perugia, Italy		Interventional	https://ClinicalTrials.gov/show/NCT03045406
	Phase 3	A Phase III Study of BKM120 With Fulvestrant in Patients With HR+,HER2-, AI Treated, Locally Advanced or Metastatic Breast Cancer Who Progressed on or After mTORi	Metastatic Breast Cancer	Drug: Fulvestrant|Drug: BKM120|Drug: BKM120 matching placebo	Novartis Pharmaceuticals|Novartis		Interventional	https://ClinicalTrials.gov/show/NCT01633060
	Phase 3	Effect of Megestrol Acetate on the Quality of Life of Patients With Esophageal Carcinoma	Stage III Esophageal Squamous Cell Carcinoma|Stage II Esophageal Squamous Cell Carcinoma	Drug: Megestrolï¼ˆYiningï¼‰|Radiation: radiotherapy|Other: chemotherapy	The First Affiliated Hospital of Henan University of Science and Technology		Interventional	https://ClinicalTrials.gov/show/NCT02644408
	Phase 3	Topical Timolol for Superficial Infantile Hemangioma	Hemangioma	Drug: 0.5% timolol maleate eye drop|Drug: Normal saline	Mahidol University		Interventional	https://ClinicalTrials.gov/show/NCT01685398
	Phase 3	Long-term Treatment for Cancer Patients With Deep Venous Thrombosis or Pulmonary Embolism	Venous Thromboembolism|Neoplasms	Drug: low molecular weight heparin|Drug: vitamin K antagonists	University Medical Center Groningen		Interventional	https://ClinicalTrials.gov/show/NCT01164046
	Phase 3	The Effect of Simvastatin on Uterine Leiomyoma Development and Growth in Infertile Women	Infertility	Drug: oral drug and vaginal placebo|Drug: oral drug and oral placebo|Drug: Vaginal placebo+ oral placebo	Royan Institute		Interventional	https://ClinicalTrials.gov/show/NCT03134157
	Phase 3	Prophylaxis of Venous Thromboembolism in Advanced Lung Cancer	Lung Cancer	Drug: Nadroparin, long term|Drug: Nadroparin: short-term	Shengqing Li|Fourth Military Medical University		Interventional	https://ClinicalTrials.gov/show/NCT01980849
	Phase 3	Apixaban in Preventing Secondary Cancer Related Blood Clots in Cancer Patients Who Have Completed Anticoagulation Therapy	Deep Vein Thrombosis|Malignant Neoplasm|Metastatic Malignant Neoplasm|Pulmonary Embolism	Drug: Apixaban	Academic and Community Cancer Research United|National Cancer Institute (NCI)		Interventional	https://ClinicalTrials.gov/show/NCT03080883
	Phase 3	SorAfenib Versus RADIOEMBOLIZATION in Advanced Hepatocellular Carcinoma	Liver Carcinoma	Drug: sorafenib|Drug: SIR-Sphere	Assistance Publique - Hôpitaux de Paris|Ministry of Health, France		Interventional	https://ClinicalTrials.gov/show/NCT01482442
	Phase 3	Carboplatin and Paclitaxel or Oxaliplatin and Capecitabine With or Without Bevacizumab as First-Line Therapy in Treating Patients With Newly Diagnosed Stage II-IV or Recurrent Stage I Epithelial Ovarian or Fallopian Tube Cancer	Borderline Ovarian Mucinous Tumor|Ovarian Mucinous Cystadenocarcinoma|Recurrent Fallopian Tube Carcinoma|Recurrent Ovarian Carcinoma|Stage IA Fallopian Tube Cancer|Stage IA Ovarian Cancer|Stage IB Fallopian Tube Cancer|Stage IB Ovarian Cancer|Stage IC Fallopian Tube Cancer|Stage IC Ovarian Cancer|Stage IIA Fallopian Tube Cancer|Stage IIA Ovarian Cancer|Stage IIB Fallopian Tube Cancer|Stage IIB Ov…	Biological: Bevacizumab|Drug: Capecitabine|Drug: Carboplatin|Other: Laboratory Biomarker Analysis|Drug: Oxaliplatin|Drug: Paclitaxel|Other: Quality-of-Life Assessment	National Cancer Institute (NCI)		Interventional	https://ClinicalTrials.gov/show/NCT01081262
	Phase 3	Prophylaxis of Venous Thromboembolism in Advanced Lung Cancer (PROVE)	Venous Thromboembolism|Lung Neoplasm	Drug: Tinzaparin Sodium	Assistance Publique - Hôpitaux de Paris|Ministry of Health, France|National Cancer Institute, France		Interventional	https://ClinicalTrials.gov/show/NCT03090880
	Phase 3	Apixaban or Dalteparin in Reducing Blood Clots in Patients With Cancer Related Venous Thromboembolism	Deep Vein Thrombosis|Malignant Neoplasm|Portal Vein Thrombosis|Pulmonary Embolism|Renal Vein Thrombosis|Venous Thromboembolism	Drug: Apixaban|Drug: Dalteparin|Other: Questionnaire Administration	Academic and Community Cancer Research United|National Cancer Institute (NCI)		Interventional	https://ClinicalTrials.gov/show/NCT02585713
	Phase 3	Everolimus With or Without Bevacizumab in Treating Patients With Advanced Kidney Cancer That Progressed After First-Line Therapy	Clear Cell Renal Cell Carcinoma|Recurrent Renal Cell Carcinoma|Stage III Renal Cell Cancer|Stage IV Renal Cell Cancer	Biological: Bevacizumab|Drug: Everolimus|Other: Laboratory Biomarker Analysis|Other: Pharmacological Study	National Cancer Institute (NCI)		Interventional	https://ClinicalTrials.gov/show/NCT01198158
	Phase 3	A Study to Compare Tivozanib Hydrochloride to Sorafenib in Subjects With Refractory Advanced RCC	Carcinoma, Renal Cell	Drug: tivozanib hydrochloride|Drug: Sorafenib	AVEO Pharmaceuticals, Inc.		Interventional	https://ClinicalTrials.gov/show/NCT02627963
	Phase 3	Efficacy of Tranexamic Acid in Brain Tumor Resections	Brain Tumors|Neoplasms|Gliomas|Astrocytomas|Meningiomas	Drug: Tranexamic Acid|Drug: Placebo: Saline	Colombian Foundation for Epilepsy and Neurological Disease		Interventional	https://ClinicalTrials.gov/show/NCT01655927
	Phase 3	A Study of the Effectiveness of Armodafinil to Treat Cancer-Related Fatigue in Patients With Multiple Myeloma	Fatigue|Multiple Myeloma	Drug: armodafinil|Drug: Placebo	Oncotherapeutics|Cephalon		Interventional	https://ClinicalTrials.gov/show/NCT01160380
	Phase 3	Thromboprophylaxis After Surgery for Gynecologic Malignancy in China	Gynecologic Neoplasms|Venous Thromboembolism|Low Molecular Weight Heparin|Argatroban	Drug: s-LMWH|Drug: LMWH|Drug: Argatroban	Huazhong University of Science and Technology		Interventional	https://ClinicalTrials.gov/show/NCT02935530
	Phase 3	Denosumab Compared to Zoledronic Acid in the Treatment of Bone Disease in Subjects With Multiple Myeloma	Cancer|Hematologic Malignancies|Multiple Myeloma|Oncology|Bone Metastases|Multiple Myeloma Bone Lesions	Drug: Denosumab|Drug: Zoledronic acid	Amgen|Daiichi Sankyo Inc.		Interventional	https://ClinicalTrials.gov/show/NCT01345019
	Phase 3	Rivaroxaban or Placebo for Extended Antithrombotic Prophylaxis After Laparoscopic Surgery for Colorectal Cancer.	Prevention of Venous Thromboembolism	Drug: Rivaroxaban|Drug: Placebo	Fadoi Foundation, Italy|University Of Perugia		Interventional	https://ClinicalTrials.gov/show/NCT03055026
	Phase 3	Esmolol Versus Dexmedetomidine During Intracranial Procedures	Intracranial Aneurysm|Intracranial Neoplasms	Drug: Esmolol|Drug: Dexmedetomidine	George Papanicolaou Hospital		Interventional	https://ClinicalTrials.gov/show/NCT02563288
	Phase 3	A Study of Oral Ixazomib Citrate (MLN9708) Maintenance Therapy in Participants With Multiple Myeloma Following Autologous Stem Cell Transplant	Multiple Myeloma|Autologous Stem Cell Transplant	Drug: Ixazomib Citrate|Drug: Placebo	Millennium Pharmaceuticals, Inc.|Takeda		Interventional	https://ClinicalTrials.gov/show/NCT02181413
	Phase 3	A Phase 3, Pivotal Trial of VB-111 Plus Bevacizumab vs. Bevacizumab in Patients With Recurrent Glioblastoma (GLOBE)	Glioblastoma	Drug: VB-111 + bevacizumab|Drug: Bevacizumab	Vascular Biogenics Ltd. operating as VBL Therapeutics		Interventional	https://ClinicalTrials.gov/show/NCT02511405
	Phase 3	Ultrasonic Scalpel vs. Monopolar Electrocautery for D2 Distal Gastric Carcinoma Surgery	Gastric Cancer|Surgery|Ultrasonic Scalpel|Monopolar Electrocautery|Operation Time|Blood Loss, Surgical|Quality of Life|External Causes of Morbidity and Mortality	Device: Monopolar electrocautery|Device: Ultrasonic scalpel	West China Hospital		Interventional	https://ClinicalTrials.gov/show/NCT02130752
	Phase 3	Dabigatran Etexilate for Secondary Stroke Prevention in Patients With Embolic Stroke of Undetermined Source (RE-SPECT ESUS)	Stroke|Secondary Prevention	Drug: optional ASA as comedication|Drug: placebo to ASA|Drug: placebo to optional ASA as comedication|Drug: placebo to dabigatran etexilate|Drug: ASA 100 mg|Drug: dabigatran etexilate	Boehringer Ingelheim		Interventional	https://ClinicalTrials.gov/show/NCT02239120
	Phase 3	A Phase 3 Study Comparing Oral Ixazomib Plus Lenalidomide and Dexamethasone Versus Placebo Plus Lenalidomide and Dexamethasone in Adult Patients With Relapsed and/or Refractory Multiple Myeloma	Relapsed Multiple Myeloma|Refractory Multiple Myeloma	Drug: Ixazomib|Drug: Lenalidomide|Drug: Dexamethasone|Drug: Placebo	Millennium Pharmaceuticals, Inc.|Takeda		Interventional	https://ClinicalTrials.gov/show/NCT01564537
	Phase 3	Vasopressin Versus Epinephrine in Myomectomy	Uterine Myomas	Drug: Epinephrine|Drug: Vasopressin	CHA University		Interventional	https://ClinicalTrials.gov/show/NCT01861015
	Phase 3	Endovascular Brachytherapy Combined With Stent Placement and TACE for HCC With Main Portal Vein Tumor Thrombus	Hepatocellular Carcinoma|Portal Vein Tumor Thrombus	Procedure: Stent and Iodine-125 seed strand implantation|Device: Stent|Device: Iodine-125 seed|Drug: Epirubicin|Drug: Ultra-fluid lipiodol|Other: Gelatin sponge articles	Shanghai Zhongshan Hospital|Ruijin Hospital|RenJi Hospital|Shanghai Ninth People's Hospital Affiliated to Shanghai Jiao Tong University|The First Affiliated Hospital of Soochow University|The First Affiliated Hospital with Nanjing Medical University|Second Affiliated Hospital, School of Medicine, Zhejiang University|Lishui Country People's Hospital|Zhejiang University|Changhai Hospital|Cancer Ins…		Interventional	https://ClinicalTrials.gov/show/NCT02971345
	Phase 3	A Study of Oral Ixazomib Maintenance Therapy in Patients With Newly Diagnosed Multiple Myeloma Not Treated With Stem Cell Transplantation	Multiple Myeloma	Drug: Ixazomib|Drug: Placebo	Millennium Pharmaceuticals, Inc.|Takeda		Interventional	https://ClinicalTrials.gov/show/NCT02312258
	Phase 3	Intrapleural Bevacizumab and Cisplatin Therapy for Malignant Pleural Effusion Caused by Non-small Cell Lung Cancer	Malignant Pleural Effusion	Drug: Bevacizumab|Drug: Cisplatin	Chinese PLA General Hospital|Roche Pharma AG		Interventional	https://ClinicalTrials.gov/show/NCT01661790
	Phase 3	Optimal Prophylactic Method of Venous Thromboembolism (VTE)	Venous Thromboembolism	Drug: low molecular weight heparin	The Catholic University of Korea		Interventional	https://ClinicalTrials.gov/show/NCT01448746
	Phase 3	PH III Study of Lenalidomide and Dexamethasone With or Without Elotuzumab to Treat Previously Untreated Multiple Myeloma (ELO 1 Substudy)	Newly Diagnosed, Previously Untreated Multiple Myeloma	Drug: Lenalidomide|Drug: Dexamethasone|Biological: Elotuzumab	Bristol-Myers Squibb|Abbott		Interventional	https://ClinicalTrials.gov/show/NCT01891643
	Phase 3	Study of Carfilzomib, Daratumumab and Dexamethasone for Patients With Relapsed and/or Refractory Multiple Myeloma.	Relapsed or Refractory Multiple Myeloma	Drug: Dexamethasone|Drug: Daratumumab|Drug: Carfilzomib	Amgen		Interventional	https://ClinicalTrials.gov/show/NCT03158688
	Phase 3	A Study of the Efficacy and Safety of Etrolizumab in Ulcerative Colitis Participants Who Are Refractory to or Intolerant of Tumor Necrosis Factor (TNF) Inhibitors	Ulcerative Colitis	Drug: Etrozulimab|Drug: Placebo	Hoffmann-La Roche		Interventional	https://ClinicalTrials.gov/show/NCT02100696
	Phase 3	A Study of Cabozantinib (XL184) vs Everolimus in Subjects With Metastatic Renal Cell Carcinoma	Renal Cell Carcinoma	Drug: Cabozantinib tablets|Drug: Everolimus (Afinitor) tablets	Exelixis		Interventional	https://ClinicalTrials.gov/show/NCT01865747
	Phase 3	Aplidin - Dexamethasone in Relapsed/Refractory Myeloma	Relapsed/Refractory Multiple Myeloma	Drug: plitidepsin + dexamethasone|Drug: dexamethasone	PharmaMar		Interventional	https://ClinicalTrials.gov/show/NCT01102426
	Phase 3	Secondary Prevention of Cardiovascular Disease in the Elderly Trial	Myocardial Infarction|Cardiovascular Disease	Drug: Cardiovascular Polypill|Drug: Treatment Prevention for Secondary CV	Fundación Centro Nacional de Investigaciones Cardiovasculares Carlos III|Charite University, Berlin, Germany|Centre Hospitalier Universitaire de Besancon|Wroclaw Medical University|Semmelweis University|General University Hospital, Prague|Servicio MadrileÃ±o de Salud, Madrid, Spain|London School of Hygiene and Tropical Medicine|Ferrer Internacional S.A.|Istituto Di Ricerche Farmacologiche Mario N…		Interventional	https://ClinicalTrials.gov/show/NCT02596126
	Phase 3	Lenalidomide, Adriamycin, Dexamethasone (RAD) Versus Lenalidomide, Bortezomib, Dexamethasone (VRD) for Induction in Newly Diagnosed Multiple Myeloma Followed by Response-adapted Consolidation and Lenalidomide Maintenance	Previously Untreated Symptomatic Multiple Myeloma	Drug: Lenalidomide, Bortezomib|Biological: autologous stem cell transplant|Biological: allogeneic stem cell transplant	Wuerzburg University Hospital|ClinAssess GmbH|Celgene Corporation		Interventional	https://ClinicalTrials.gov/show/NCT01685814
	Phase 3	Multinational Clinical Study Comparing Isatuximab, Pomalidomide, and Dexamethasone to Pomalidomide and Dexamethasone in Refractory or Relapsed and Refractory Multiple Myeloma Patients	Plasma Cell Myeloma	Drug: isatuximab (EFC14335)|Drug: pomalidomide|Drug: dexamethasone	Sanofi		Interventional	https://ClinicalTrials.gov/show/NCT02990338
	Phase 3	Combination Chemotherapy, Bevacizumab, and/or Atezolizumab in Treating Patients With Microsatellite Instability-High Metastatic Colorectal Cancer	Colorectal Adenocarcinoma|High-Frequency Microsatellite Instability|Stage IV Colorectal Cancer|Stage IVA Colorectal Cancer|Stage IVB Colorectal Cancer	Drug: Atezolizumab|Biological: Bevacizumab|Drug: Fluorouracil|Other: Laboratory Biomarker Analysis|Drug: Leucovorin Calcium|Drug: Oxaliplatin|Other: Quality-of-Life Assessment	National Cancer Institute (NCI)		Interventional	https://ClinicalTrials.gov/show/NCT02997228
	Phase 3	Comparison of Ibandronate - Zoledronate Regarding Nephrotoxicity in Multiple Myeloma	Multiple Myeloma	Drug: Ibandronate|Drug: Zoledronate	Hoffmann-La Roche|Roche Pharma AG		Interventional	https://ClinicalTrials.gov/show/NCT02739594
	Phase 3	Study of Cabozantinib (XL184) vs Placebo in Subjects With Hepatocellular Carcinoma Who Have Received Prior Sorafenib	Hepatocellular Carcinoma	Drug: Cabozantinib tablets|Drug: Placebo tablets	Exelixis		Interventional	https://ClinicalTrials.gov/show/NCT01908426
	Phase 3	A Study of Combination of Daratumumab and Velcade (Bortezomib) Melphalan-Prednisone (DVMP) Compared to Velcade Melphalan-Prednisone (VMP) in Participants With Previously Untreated Multiple Myeloma	Multiple Myeloma	Drug: Velcade|Drug: Melphalan|Drug: Prednisone|Drug: Daratumumab|Drug: Dexamethasone	Janssen Research & Development, LLC		Interventional	https://ClinicalTrials.gov/show/NCT02195479
	Phase 3	Continued, Long-Term Follow-Up and Lenalidomide Maintenance Therapy for Patients on BMT CTN 0702 Protocol (BMT CTN 07LT)	Multiple Myeloma	Drug: Lenalidomide	National Heart, Lung, and Blood Institute (NHLBI)|Blood and Marrow Transplant Clinical Trials Network|National Cancer Institute (NCI)|National Marrow Donor Program		Interventional	https://ClinicalTrials.gov/show/NCT02322320
	Phase 3	A Post-Approval Pharmacokinetic Study of Bortezomib in Participants With Multiple Myeloma	Multiple Myeloma	Drug: Bortezomib	Johnson & Johnson Taiwan Ltd		Interventional	https://ClinicalTrials.gov/show/NCT01801436
	Phase 3	Stem Cell Transplant With Lenalidomide Maintenance in Patients With Multiple Myeloma (BMT CTN 0702)	Multiple Myeloma	Drug: Lenalidomide|Drug: lenalidomide, bortezomib and dexamethasone|Drug: Lenalidomide	National Heart, Lung, and Blood Institute (NHLBI)|Blood and Marrow Transplant Clinical Trials Network|National Cancer Institute (NCI)		Interventional	https://ClinicalTrials.gov/show/NCT01109004
	Phase 3	IXAZOMIB Plus Lenalidomide and Dexamethasone Versus Placebo Plus Lenalidomide and Dexamethasone in Adult Patients With Newly Diagnosed Multiple Myeloma	Multiple Myeloma	Drug: IXAZOMIB + Lenalidomide + Dexamethasone|Drug: Placebo + Lenalidomide + Dexamethasone	Millennium Pharmaceuticals, Inc.|Takeda		Interventional	https://ClinicalTrials.gov/show/NCT01850524
	Phase 3	Combination of Lenalidomide and Dexamethasone in Treatment of Multiple Myeloma	Multiple Myeloma	Drug: Lenalidomide, Dexamethasone|Drug: Lenalidomide, Dexamethasone, PBSCT	Gesellschaft fur Medizinische Innovation â€“ Hamatologie und Onkologie mbH|ClinAssess GmbH		Interventional	https://ClinicalTrials.gov/show/NCT01090089
	Phase 3	Efficacy and Safety of Pomalidomide in Combination With Low-dose Dexamethasone in Chinese Patients With Relapsed and Refractory Multiple Myeloma	Multiple Myeloma	Drug: Pomalidomide|Drug: Dexamethasone	Jiangsu Simcere Pharmaceutical Co., Ltd.		Interventional	https://ClinicalTrials.gov/show/NCT02916420
	Phase 3	STUDY TO DETERMINE THE EFFICACY AND SAFETY OF STANDARD SCHEDULE VERSUS A NEW ALGORITHM OF DOSE REDUCTIONS IN ELDERLY AND UNFIT NEWLY DIAGNOSED MULTIPLE MYELOMA PATIENTS RECEIVING LENALIDOMIDE PLUS STEROIDS	Multiple Myeloma	Drug: Lenalidomide|Drug: Dexamethasone	Fondazione Neoplasie Sangue Onlus		Interventional	https://ClinicalTrials.gov/show/NCT02215980
	Phase 3	Evaluation of Safety of Pomalidomide in Combination With Dexamethasone (Low Dose) in Patients With Refractory or Relapsed and Refractory Multiple Myeloma	Multiple Myeloma	Drug: Pomalidomide|Drug: Dexamethasone	Celgene		Interventional	https://ClinicalTrials.gov/show/NCT01712789
	Phase 3	A Phase 3, Multicenter, Randomized, Open-Label Study to Compare the Efficacy and Safety of Pomalidomide in Combination With Low-Dose Dexamethasone Versus High-Dose Dexamethasone in Subjects With Refractory Multiple Myeloma or Relapsed and Refractory Multiple Myeloma and Companion Study	Multiple Myeloma	Drug: pomalidomide|Drug: dexamethasone	Celgene		Interventional	https://ClinicalTrials.gov/show/NCT01311687
	Phase 3	Thalidomide Plus Dexamethasone as Maintenance Therapy for Multiple Myeloma	Multiple Myeloma	Drug: Thalidomide plus dexamethasone|Drug: Dexamethasone	Grupo de Estudos Multicentricos em Onco-Hematologia		Interventional	https://ClinicalTrials.gov/show/NCT01296503
	Phase 3	Study Comparing Conventional Dose Combination RVD to High-Dose Treatment With ASCT in the Initial Myeloma up to 65 Years	Myeloma	Drug: Lenalidomide, Bortezomib|Drug: Lenalidomide, Bortezomib	University Hospital, Toulouse|Dana-Farber Cancer Institute|Celgene Corporation|Janssen-Cilag Ltd.		Interventional	https://ClinicalTrials.gov/show/NCT01191060
	Phase 3	Velcade, Melphalan, Prednisone And Thalidomide Versus Velcade, Melphalan, Prednisone in Multiple Myeloma Patients	Multiple Myeloma	Drug: Bortezomib, Melphalan, Prednisone, Thalidomide|Drug: Bortezomib, Melphalan, Prednisone	Fondazione Neoplasie Sangue Onlus		Interventional	https://ClinicalTrials.gov/show/NCT01063179
	Phase 3	A Study of Carfilzomib in Combination With Dexamethasone (Kd) in Chinese Subjects With Relapsed and Refractory Multiple Myeloma	Relapsed and Refractory Multiple Myeloma	Drug: Dexamethasone|Drug: Carfilzomib	Amgen|Onyx Therapeutics, Inc.		Interventional	https://ClinicalTrials.gov/show/NCT03029234
	Phase 3	Study of Subcutaneous and Intravenous Velcade in Combination With Dexamethasone in Chinese Subjects With Relapsed and Refractory Multiple Myeloma	Multiple Myeloma	Drug: Bortezomib|Drug: Dexamethasone	Janssen Research & Development, LLC		Interventional	https://ClinicalTrials.gov/show/NCT02811978
	Phase 3	A Study in Subjects With Relapsed and Refractory Multiple Myeloma Receiving Carfilzomib in Combination With Dexamethasone, Comparing Once-weekly Versus Twice-weekly Carfilzomib Dosing (ARROW)	Multiple Myeloma	Drug: Carfilzomib|Drug: Dexamethasone	Amgen		Interventional	https://ClinicalTrials.gov/show/NCT02412878
	Phase 3	A Phase 3 Study to Evaluate Efficacy and Safety of Masitinib in Patients With Relapse or Refractory Multiple Myeloma	Multiple Myeloma	Drug: masitinib 6 mg/kg/day|Drug: placebo	AB Science		Interventional	https://ClinicalTrials.gov/show/NCT01470131
	Phase 3	Randomized Trial of G-CSF Alone Versus Intermediate-dose Ara-C Plus G-CSF Mobilization in Multiple Myeloma Patients.	Multiple Myeloma	Drug: G-CSF (filgrastim)|Drug: Cytosine arabinoside + G-CSF (filgrastim)	Maria Sklodowska-Curie Memorial Cancer Center, Institute of Oncology		Interventional	https://ClinicalTrials.gov/show/NCT01908621
	Phase 3	Lenalidomide vs Placebo Maintenance Therapy Following Melphalan Prednisone VelcadeÂ® Induction Therapy in NDMM	Multiple Myeloma	Drug: Lenalidomide|Drug: Placebo	Celgene Corporation		Interventional	https://ClinicalTrials.gov/show/NCT02112175
	Phase 3	Bortezomib-Melphalan Conditioning Regimen vs Melphalan for Frontline Transplant Eligible Patients With Multiple Myeloma	Multiple Myeloma	Drug: Bortezomib-Melphalan|Drug: Melphalan	University Hospital, Toulouse|Ministry of Health, France|Janssen, LP		Interventional	https://ClinicalTrials.gov/show/NCT02197221
	Phase 3	Graft-Versus-Host Disease Prophylaxis in Treating Patients With Hematologic Malignancies Undergoing Unrelated Donor Peripheral Blood Stem Cell Transplant	Acute Lymphoblastic Leukemia|Acute Myeloid Leukemia|Aggressive Non-Hodgkin Lymphoma|Chronic Lymphocytic Leukemia|Diffuse Large B-Cell Lymphoma|Hematopoietic and Lymphoid Cell Neoplasm|Indolent Non-Hodgkin Lymphoma|Mantle Cell Lymphoma|Myelodysplastic Syndrome|Myeloproliferative Neoplasm|Prolymphocytic Leukemia|Recurrent Chronic Lymphocytic Leukemia|Recurrent Plasma Cell Myeloma|Refractory Chronic…	Procedure: Allogeneic Hematopoietic Stem Cell Transplantation|Drug: Cyclosporine|Drug: Fludarabine Phosphate|Drug: Mycophenolate Mofetil|Procedure: Peripheral Blood Stem Cell Transplantation|Drug: Sirolimus|Radiation: Total-Body Irradiation	Fred Hutchinson Cancer Research Center|National Cancer Institute (NCI)		Interventional	https://ClinicalTrials.gov/show/NCT01231412
	Phase 3	Phase III Study of Lenalidomide and Dexamethasone With or Without Elotuzumab to Treat Relapsed or Refractory Multiple Myeloma	Lymphoma (Myeloma)|Multiple Myeloma	Drug: Lenalidomide|Drug: Dexamethasone|Drug: Dexamethasone (Oral)|Drug: Dexamethasone (IV)|Biological: Elotuzumab (BMS-901608; HuLuc63)	Bristol-Myers Squibb|AbbVie		Interventional	https://ClinicalTrials.gov/show/NCT01239797
	Phase 3	Use of Thalidomide, Lenalidomide, Carfilzomib, Bortezomib and Vorinostat in the Initial Treatment of Newly Diagnosed Multiple Myeloma Patients	Multiple Myeloma	Drug: Induction (intensive pathway) - cyclophosphamide, lenalidomide, & dexamethasone (CRD) regimen|Drug: Induction (intensive pathway) - cyclophosphamide, thalidomide, & dexamethasone (CTD) regimen|Drug: Induction (intensive pathway) - carfilzomib, cyclophosphamide, lenalidomide, & dexamethasone (CCRD) regimen|Drug: Induction (non-intensive pathway) - cyclophosphamide, lenalidomide, & dexamethas…	University of Leeds|Celgene|Merck Sharp & Dohme Corp.|Amgen		Interventional	https://ClinicalTrials.gov/show/NCT01554852
	Phase 3	UARK 2009-09 Myeloma Cure Project: Prospective Trial of Indefinite Revlimid Maintenance Versus Observation for Currently Event-Free Patients With Multiple Myeloma	Multiple Myeloma	Drug: Revlimid	University of Arkansas		Interventional	https://ClinicalTrials.gov/show/NCT01621672
	Phase 3	Study to Evaluate the Safety and Efficacy of Pomalidomide Monotherapy in Subjects With Refractory or Relapsed Refractory Multiple Myeloma	Multiple Myeloma	Drug: pomalidomide	Celgene Corporation		Interventional	https://ClinicalTrials.gov/show/NCT01324947
	Phase 3	Adjuvant Chemotherapy With FOLFOX in HCC Patients After Resection	Carcinoma, Hepatocellular	Drug: Adjuvant chemotherapy|Procedure: Follow-up	Sun Yat-sen University		Interventional	https://ClinicalTrials.gov/show/NCT02738697
	Phase 3	Tandem Auto Stem Cell Transplant With Melphalan Followed by Melphalan and Bortezomib in Patients With Multiple Myeloma	Multiple Myeloma|Auto Stem Cell Transplant	Drug: Bortezomib	Hackensack University Medical Center		Interventional	https://ClinicalTrials.gov/show/NCT01241708
	Phase 3	A Study of Carfilzomib vs Best Supportive Care in Subjects With Relapsed and Refractory Multiple Myeloma	Multiple Myeloma	Drug: Carfilzomib|Drug: Best Supportive Care	Amgen		Interventional	https://ClinicalTrials.gov/show/NCT01302392
	Phase 3	A Study Comparing Ponatinib and Nilotinib in Patients With Chronic Myeloid Leukemia	Chronic Phase Chronic Myeloid Leukemia	Drug: ponatinib 30 mg QD|Drug: ponatinib 15 mg QD|Drug: nilotinib 400 mg BID	Ariad Pharmaceuticals		Interventional	https://ClinicalTrials.gov/show/NCT02627677
	Phase 3	Intralesional Candidal Antigen Versus Intralesional Zinc Sulphate in Treatment of Cutaneous Warts	Warts	Drug: Candida Antigen|Drug: Zinc Sulfate	Assiut University		Interventional	https://ClinicalTrials.gov/show/NCT03158168
	Phase 3	Trial of Three Stem Cell Mobilization Regimens for Multiple Myeloma	Multiple Myeloma	Drug: bortezomib (Velcade)|Drug: cyclophosphamide|Drug: G-CSF	Weill Medical College of Cornell University|Millennium Pharmaceuticals, Inc.		Interventional	https://ClinicalTrials.gov/show/NCT01146834
	Phase 3	Trial Studying Maintenance Treatment With Lenalidomide and Dexamethasone Versus Lenalidomide, Dexamethasone and MLN9708 After Autologous Hematopoietic Stem Cell Transplantation in Patients With Newly-diagnosed Symptomatic Multiple Myeloma	Multiple Myeloma	Drug: MLN9708|Drug: Lenalidomide|Drug: Dexamethasone	PETHEMA Foundation|Celgene|Millennium Pharmaceuticals, Inc.		Interventional	https://ClinicalTrials.gov/show/NCT02406144
	Phase 3	Iberoamerican Protocol With Thalidomide in Patients With Symptomatic Newly Diagnosed Multiple Myeloma Over 65 Years	Multiple Myeloma	Drug: Thalidomide, Cyclophosphamide, Dexamethasone|Drug: Thalidomide, Dexamethasone|Drug: Thalidomide, Melphalan, Prednisone	Grupo de Estudos Multicentricos em Onco-Hematologia		Interventional	https://ClinicalTrials.gov/show/NCT01532856
	Phase 3	Lenalidomide and Dexamethasone Versus Melphalan Prednisone and Lenalidomide Versus Cyclophosphamide, Prednisone and Lenalidomide in Elderly Multiple Myeloma Patients	Multiple Myeloma	Drug: Melphalan, Prednisone, Lenalidomide|Drug: Cyclophosphamide, Prednisone, Lenalidomide|Drug: Lenalidomide, dexamethasone	Fondazione Neoplasie Sangue Onlus		Interventional	https://ClinicalTrials.gov/show/NCT01093196
	Phase 3	Study to Compare VMP With HDM Followed by VRD Consolidation and Lenalidomide Maintenance in Patients With Newly Diagnosed Multiple Myeloma	Multiple Myeloma	Drug: Bortezomib, Melphalan, Prednisone (VMP)|Drug: 1 or 2 cycle(s) HDM (High Dose Melphalan)|Drug: 2 cycles of Bortezomib, Lenalidomide, Dexamethasone (VRD)	Stichting Hemato-Oncologie voor Volwassenen Nederland|European Myeloma Network|GIMEMA (Italian Group for Adult Hematologic Diseases)|DSMM (Deutsche Studiengruppe Multiples Myelom)|NMSG (Nordic Myeloma Study Group)|Central European Myeloma Study Group		Interventional	https://ClinicalTrials.gov/show/NCT01208766
	Phase 3	A Study of Melflufen-dex or Pomalidomide-dex for RRMM Patients Refractory to Lenalidomide	Multiple Myeloma	Drug: Melflufen|Drug: Pomalidomide|Drug: Dexamethasone	Oncopeptides AB		Interventional	https://ClinicalTrials.gov/show/NCT03151811
	Phase 3	Trial of Carfilzomib, Lenalidomide, Dexamethasone Versus Lenalidomide Alone After Stem-cell Transplant for Multiple Myeloma	Multiple Myeloma	Drug: Lenalidomide|Drug: Carfilzomib|Drug: Dexamethasone	University of Chicago		Interventional	https://ClinicalTrials.gov/show/NCT02659293
	Phase 3	GEM-CLARIDEX: Ld vs BiRd	Multiple Myeloma	Drug: Clarithromycin|Drug: Lenalidomide|Drug: Dexamethasone	PETHEMA Foundation|Cabyc, S.L.		Interventional	https://ClinicalTrials.gov/show/NCT02575144
	Phase 3	A Study to Evaluate Daratumumab in Transplant Eligible Participants With Previously Untreated Multiple Myeloma	Multiple Myeloma	Drug: Bortezomib (VELCADE), Thalidomide, and Dexamethasone (VTD)|Drug: Bortezomib, Thalidomide, Dexamethasone (VTD) + daratumumab|Drug: Daratumumab	Intergroupe Francophone du Myelome|HOVON - Dutch Haemato-Oncology Association|Janssen Research & Development, LLC		Interventional	https://ClinicalTrials.gov/show/NCT02541383
	Phase 3	BiRd vs. Rd as Initial Therapy in Multiple Myeloma	Multiple Myeloma	Drug: Clarithromycin|Drug: Lenalidomide|Drug: Dexamethasone	Weill Medical College of Cornell University|Celgene Corporation		Interventional	https://ClinicalTrials.gov/show/NCT02516696
	Phase 3	Study Comparing Daratumumab, Lenalidomide, and Dexamethasone With Lenalidomide and Dexamethasone in Participants With Previously Untreated Multiple Myeloma	Multiple Myeloma	Drug: Daratumumab|Drug: Lenalidomide|Drug: Dexamethasone	Janssen Research & Development, LLC		Interventional	https://ClinicalTrials.gov/show/NCT02252172
	Phase 3	A Study Comparing Daratumumab, Lenalidomide, and Dexamethasone With Lenalidomide and Dexamethasone in Relapsed or Refractory Multiple Myeloma	Multiple Myeloma	Drug: Daratumumab|Drug: Lenalidomide|Drug: Dexamethasone	Janssen Research & Development, LLC		Interventional	https://ClinicalTrials.gov/show/NCT02076009
	Phase 3	Safety and Efficacy of Pomalidomide, Bortezomib and Low-dose Dexamethasone in Subjects With Relapsed or Refractory Multiple Myeloma	Multiple Myeloma	Drug: Pomalidomide|Drug: Bortezomib|Drug: Dexamethasone	Celgene		Interventional	https://ClinicalTrials.gov/show/NCT01734928
	Phase 3	Lenalidomide and Low Dose Dexamethasone Versus Bortezomib, Lenalidomide and Low Dose Dexamethasone for Induction, in Patients With Previously Untreated Multiple Myeloma	Multiple Myeloma	Drug: Lenalidomide/Low dose Dex|Drug: Bortezomib/Lenalidomide/ Low dose Dex|Drug: Lenalidomide	King Faisal Specialist Hospital & Research Center		Interventional	https://ClinicalTrials.gov/show/NCT01530594
	Phase 3	Phase 3 Study Comparing Carfilzomib, Lenalidomide, and Dexamethasone (CRd) vs Lenalidomide and Dexamethasone (Rd) in Subjects With Relapsed Multiple Myeloma	Relapsed Multiple Myeloma	Drug: Dexamethasone|Drug: Lenalidomide|Drug: Carfilzomib	Amgen		Interventional	https://ClinicalTrials.gov/show/NCT01080391
	Phase 3	Bortezomib, Selinexor, and Dexamethasone in Patients With Multiple Myeloma	Multiple Myeloma	Drug: Selinexor|Drug: Bortezomib|Drug: Dexamethasone	Karyopharm Therapeutics Inc		Interventional	https://ClinicalTrials.gov/show/NCT03110562
	Phase 3	Addition of Daratumumab to Combination of Bortezomib and Dexamethasone in Participants With Relapsed or Refractory Multiple Myeloma	Multiple Myeloma	Drug: Daratumumab|Drug: VELCADE (Bortezomib)|Drug: Dexamethasone	Janssen Research & Development, LLC		Interventional	https://ClinicalTrials.gov/show/NCT02136134
	Phase 3	Phase 3 Study With Carfilzomib and Dexamethasone Versus Bortezomib and Dexamethasone for Relapsed Multiple Myeloma Patients	Multiple Myeloma	Drug: Carfilzomib|Drug: Bortezomib|Drug: Dexamethasone	Amgen		Interventional	https://ClinicalTrials.gov/show/NCT01568866
	Phase 3	Continuous Lenalidomide Therapy Versus Observation Following Induction Without Lenalidomide, Pomalidomide or Thalidomide in Myeloma	Multiple Myeloma|Neoplasms|Plasma Cells|Paraproteinemias|Blood Protein Disorders|Hematologic Diseases|Therapeutic Uses	Drug: Lenalidomide	Celgene Corporation|Celgene		Interventional	https://ClinicalTrials.gov/show/NCT02155634
	Phase 3	Safety of Dabigatran Etexilate in Blood Clot Prevention in Children	Venous Thromboembolism|Secondary Prevention	Drug: dabigatran etexilate	Boehringer Ingelheim		Interventional	https://ClinicalTrials.gov/show/NCT02197416
	Phase 3	Pomalidomide-Cyclophosphamide-Dexamethasone (PCD) Versus Pomalidomide-Dexamethasone (PD) in Relapse or Refractory Myeloma	Relapse Multiple Myeloma	Drug: PCD|Drug: PD	National University Hospital, Singapore|Celgene|International Myeloma Foundation (IMF)		Interventional	https://ClinicalTrials.gov/show/NCT03143049
	Phase 3	Study of Lenalidomide and Dexamethasone With or Without Pembrolizumab (MK-3475) in Participants With Newly Diagnosed Treatment Naive Multiple Myeloma (MK-3475-185/KEYNOTE-185)	Multiple Myeloma	Drug: lenalidomide|Drug: dexamethasone|Biological: pembrolizumab	Merck Sharp & Dohme Corp.		Interventional	https://ClinicalTrials.gov/show/NCT02579863
	Phase 3	Study of Pomalidomide and Low Dose Dexamethasone With or Without Pembrolizumab (MK-3475) in Refractory or Relapsed and Refractory Multiple Myeloma (rrMM) (MK-3475-183/KEYNOTE-183)	Multiple Myeloma	Biological: Pembrolizumab|Drug: Pomalidomide|Drug: Dexamethasone	Merck Sharp & Dohme Corp.		Interventional	https://ClinicalTrials.gov/show/NCT02576977
	Phase 3	Filgrastim With or Without Plerixafor in Treating Patients With Multiple Myeloma Previously Treated With Lenalidomide	Refractory Multiple Myeloma	Drug: plerixafor|Biological: filgrastim	Case Comprehensive Cancer Center|National Cancer Institute (NCI)		Interventional	https://ClinicalTrials.gov/show/NCT01301963
	Phase 3	A Phase 3 Study of Siltuximab or Placebo in Combination With Velcade and Dexamethasone in Patients With Relapsed or Refractory Multiple Myeloma	Multiple Myeloma	Drug: Placebo, Velcade and dexamethasone|Biological: Siltuximab, Velcade and dexamethasone	Centocor, Inc.		Interventional	https://ClinicalTrials.gov/show/NCT01266811
	Phase 3	Prevention of Left Ventricular Dysfunction During Chemotherapy	Acute Myeloid Leukemia|Precursor-cell Lymphoblastic Leukemia-Lymphoma|Lymphoid Neoplasm|Multiple Myeloma|Lymphoma|Autologous Hematopoietic Stem Cell Transplantation	Drug: Enalapril and carvedilol	Hospital Clinic of Barcelona|Instituto de Salud Carlos III|European Union		Interventional	https://ClinicalTrials.gov/show/NCT01110824
	Phase 3	Clarithromycin Plus CTd Regimen for Patients With Newly Diagnosed Multiple Myeloma	Multiple Myeloma	Drug: Clarithromycin|Drug: Thalidomide|Drug: Cyclophosphamide|Drug: Dexamethasone	Jinling Hospital, China		Interventional	https://ClinicalTrials.gov/show/NCT02248428
	Phase 3	Efficacy Study Comparing Velcade Dexamethasone Thalidomide Versus Velcade Cyclophosphamide Dexamethasone as Induction Treatment in the Initial Management of Multiple Myeloma (IFM2013-04)	Multiple Myeloma	Drug: ThalidomideÂ®|Drug: Cyclophosphamide|Drug: VelcadeÂ®|Drug: DexamÃ©thasone	Nantes University Hospital		Interventional	https://ClinicalTrials.gov/show/NCT01971658
	Phase 3	Cyclophosphamide, Lenalidomide and Dexamethasone (CRD) Versus Melphalan (200 mg/m2) Followed By Autologous Stem Cell Transplant (ASCT) In Newly Diagnosed Multiple Myeloma Subjects	Multiple Myeloma	Drug: Cyclophosphamide|Drug: Lenalidomide|Drug: Dexamethasone|Drug: Melphalan	Fondazione Neoplasie Sangue Onlus		Interventional	https://ClinicalTrials.gov/show/NCT01091831
	Phase 3	CyBorD vs. PAD in the Treatment of Newly Diagnosed Multiple Myeloma	Multiple Myeloma	Drug: Cyclophosphamide|Drug: Bortezomib|Drug: Dexamethasone|Drug: Doxorubicin	Sun Yat-sen University		Interventional	https://ClinicalTrials.gov/show/NCT02362165
	Phase 3	A Phase III Trial on the Effect of Elotuzumab in VRD Induction /Consolidation and Lenalidomide Maintenance in Patients With Newly Diagnosed Myeloma	Multiple Myeloma	Drug: elotuzumab|Drug: Lenalidomide|Drug: Bortezomib|Drug: Dexamethasone	University of Heidelberg Medical Center		Interventional	https://ClinicalTrials.gov/show/NCT02495922
	Phase 3	A Study Evaluating Venetoclax (ABT-199) in Multiple Myeloma Subjects Who Are Receiving Bortezomib and Dexamethasone as Standard Therapy	Relapsed/Refractory Multiple Myeloma	Drug: Venetoclax|Drug: Placebo|Drug: Bortezomib|Drug: Dexamethasone	AbbVie|Genentech, Inc.		Interventional	https://ClinicalTrials.gov/show/NCT02755597
	Phase 3	Study to Evaluate Optimized Retreatment and Prolonged Therapy With Bortezomib	Multiple Myeloma	Drug: bortezomib (optimized retreatment)|Drug: dexamethasone (optimized retreatment)|Drug: bortezomib (standard retreatment)|Drug: dexamethasone (standard retreatment)	Janssen-Cilag International NV		Interventional	https://ClinicalTrials.gov/show/NCT01910987
	Phase 3	Phase 3 Study of Carfilzomib, Melphalan, Prednisone vs Bortezomib, Melphalan, Prednisone in Newly Diagnosed Multiple Myeloma (CLARION)	Multiple Myeloma	Drug: Carfilzomib|Drug: Bortezomib|Drug: Melphalan|Drug: Prednisone	Amgen		Interventional	https://ClinicalTrials.gov/show/NCT01818752
	Phase 3	Randomized Trial of Lenalidomide, Bortezomib, Dexamethasone vs High-Dose Treatment With SCT in MM Patients up to Age 65	Multiple Myeloma	Drug: Lenalidomide|Drug: Bortezomib|Drug: Dexamethasone|Procedure: Autologous Stem Cell Transplant	Paul G. Richardson, MD|Celgene Corporation|Millennium Pharmaceuticals, Inc.|Massachusetts General Hospital|Cape Cod Healthcare|Beth Israel Deaconess Medical Center|Emory University|University of Michigan|Fox Chase Cancer Center|Memorial Sloan Kettering Cancer Center|Fred Hutchinson Cancer Research Center|Barbara Ann Karmanos Cancer Institute|Duke University|University of California, San Francisco…		Interventional	https://ClinicalTrials.gov/show/NCT01208662
	Phase 3	Phase III Study of Lenalidomide and Dexamethasone With or Without Elotuzumab to Treat Newly Diagnosed, Previously Untreated Multiple Myeloma	Multiple Myeloma	Drug: Lenalidomide|Drug: Dexamethasone|Drug: Dexamethasone|Drug: Dexamethasone|Drug: Dexamethasone|Biological: Elotuzumab (BMS-901608; HuLuc63)|Biological: Elotuzumab (BMS-901608; HuLuc63)	Bristol-Myers Squibb|AbbVie		Interventional	https://ClinicalTrials.gov/show/NCT01335399
	Phase 3	A Randomized Trial to Compare Busulfan + Melphalan 140 mg/m2 With Melphalan 200 mg/m2 as Preparative Regimen for Autologous Hematopoietic Stem Cell Transplantation for Multiple Myeloma	Myeloma	Drug: Busulfan|Drug: Melphalan|Other: Questionnaire|Drug: G-CSF|Drug: High Dose Melphalan|Procedure: Stem cell transplant	M.D. Anderson Cancer Center|Otsuka Pharmaceutical Development & Commercialization, Inc.		Interventional	https://ClinicalTrials.gov/show/NCT01413178
	Phase 3	An Investigational Immuno-therapy Study of Nivolumab, Elotuzumab, Pomalidomide and Dexamethasone Combinations in Patients With Multiple Myeloma	Multiple Myeloma	Biological: Nivolumab|Biological: Elotuzumab|Drug: Pomalidomide|Drug: Dexamethasone	Bristol-Myers Squibb|AbbVie		Interventional	https://ClinicalTrials.gov/show/NCT02726581
	Phase 3	Evaluation of the Use of Apixaban in Prevnetion of Thromboembolic Disease in Patients With Myeloma Trated With iMiDs	Myeloma|Venous Thromboembolism	Drug: Apixaban	University Hospital, Grenoble|Celgene Corporation		Interventional	https://ClinicalTrials.gov/show/NCT02066454
	Phase 3	Velcade (Bortezomib) Consolidation After Transplant	Multiple Myeloma	Drug: Thalidomide|Drug: Bortezomib|Drug: Cyclophosphamide|Drug: Dexamethasone|Drug: Prednisolone	Janssen Scientific Affairs, LLC		Interventional	https://ClinicalTrials.gov/show/NCT01539083
	Phase 3	Multiple Myeloma Treated With Thalidomide Before Autotransplant or With Conventional Chemotherapy and as Consolidation/Maintenance Treatment in Young and Elderly Patients : 3 Randomized Studies.	Multiple Myeloma de Novo Treatment	Drug: Thalidomide, Dexamethasone|Drug: Vincristin , Adriamycin, Dexamethasone = VAD|Drug: Thalidomide, melphalan, endoxan, dexamethasone (MCDex-Thal)|Drug: melphalan, endoxan, dexamethasone (MCDex)|Drug: Thalidomide, Dexamethasone	University Hospital, Caen|Laphal		Interventional	https://ClinicalTrials.gov/show/NCT01070862
	Phase 3	Bortezomib (Velcade), Lenalidomide (Revlimid) and IV Busulfan (Busilvex) in Patients Under 65 Years Old	Multiple Myeloma	Drug: bortezomib (Velcade)|Drug: lenalidomide (Revlimid)|Drug: busulfan (Busilvex)|Drug: Dexamethasone acetate|Drug: Melphalan	PETHEMA Foundation|Janssen, LP|Celgene|Pierre Fabre Medicament		Interventional	https://ClinicalTrials.gov/show/NCT01916252
	Phase 3	Tac, Mini-MTX, MMF Versus Tac, MTX for GVHD Prevention	Chronic Myelogenous Leukemia|Acute Lymphoblastic Leukemia|Acute Myeloid Leukemia|Acute Biphenotypic Leukemia|Myelodysplastic Syndrome|Myeloproliferative Neoplasm|Non-Hodgkin Lymphoma|Hodgkins Disease|Chronic Lymphocytic Leukemia|Multiple Myeloma	Drug: tacrolimus|Drug: methotrexate|Drug: Mycophenolate mofetil|Drug: Methotrexate (low dose)	Case Comprehensive Cancer Center|National Cancer Institute (NCI)		Interventional	https://ClinicalTrials.gov/show/NCT01951885
	Phase 3	Ranibizumab Intravitreal Injections Versus Sham Control in Patients With Branch Retinal Vein Occlusion (BRVO)	Macular Edema Secondary to Branch Retinal Vein Occlusion	Drug: Ranibizumab 0.5 mg|Other: Sham injection	Novartis Pharmaceuticals|Novartis		Interventional	https://ClinicalTrials.gov/show/NCT01976338
	Phase 3	Lenalidomide or Observation in Treating Patients With Asymptomatic High-Risk Smoldering Multiple Myeloma	Light Chain Deposition Disease|Smoldering Plasma Cell Myeloma	Other: Clinical Observation|Other: Laboratory Biomarker Analysis|Drug: Lenalidomide|Other: Quality-of-Life Assessment	National Cancer Institute (NCI)		Interventional	https://ClinicalTrials.gov/show/NCT01169337
	Phase 3	A RANDOMIZED PHASE 3 TRIAL OF TRC105 AND PAZOPANIB VERSUS PAZOPANIB ALONE IN PATIENTS WITH ADVANCED ANGIOSARCOMA	Advanced Angiosarcoma	Biological: TRC105|Drug: Votrient	Tracon Pharmaceuticals Inc.		Interventional	https://ClinicalTrials.gov/show/NCT02979899
	Phase 3	Nadolol Versus Propranolol in Children With Infantile Hemangiomas	Infantile Hemangioma	Drug: Nadolol|Drug: Propranolol	The Hospital for Sick Children		Interventional	https://ClinicalTrials.gov/show/NCT02505971
	Phase 3	Bortezomib or Carfilzomib With Lenalidomide and Dexamethasone in Treating Patients With Newly Diagnosed Multiple Myeloma	Stage I Multiple Myeloma|Stage II Multiple Myeloma|Stage III Multiple Myeloma	Drug: bortezomib|Drug: lenalidomide|Drug: dexamethasone|Drug: carfilzomib|Procedure: quality-of-life assessment|Other: laboratory biomarker analysis	ECOG-ACRIN Cancer Research Group|National Cancer Institute (NCI)|Eastern Cooperative Oncology Group		Interventional	https://ClinicalTrials.gov/show/NCT01863550
	Phase 3	Tandem Melphalan and Autolog. SCT in MM Patients 60 to 70 Years of Age With and Without Induction Chemotherapy	Multiple Myeloma	Drug: Anthracycline/dexamethasone-based induction chemotherapy|Drug: Dexamethasone for control of symptoms|Drug: Tumor-reduction chemotherapy and stem cell mobilization|Procedure: Stem cell apheresis|Drug: Tandem high-dose chemotherapy (melphalan)|Procedure: Autologous peripheral blood stem cell transplantation	WiSP Wissenschaftlicher Service Pharma GmbH		Interventional	https://ClinicalTrials.gov/show/NCT02288741
	Phase 3	VELCADE-Thalidomide-Dexamethasone (VTD) vs Thalidomide-Dexamethasone (TD) Incorporated Into Double Autotransplantation for Untreated Multiple Myeloma (MM)	Multiple Myeloma	Drug: Velcade|Drug: Thalidomide|Drug: Dexamethasone|Procedure: Peripheral Blood Stem Cell (PBSC) collection|Procedure: First Autologous Transplantation|Procedure: Second Autologous Transplantation	Michele Cavo|Janssen-Cilag S.p.A.|Azienda Ospedaliera Universitaria di Bologna Policlinico S. Orsola Malpighi		Interventional	https://ClinicalTrials.gov/show/NCT01134484
	Phase 3	Mifepristone in Meningioma	Meningioma	Drug: Mifepristone|Other: Placebo	Southwest Oncology Group|National Cancer Institute (NCI)		Interventional	https://ClinicalTrials.gov/show/NCT03015701
	Phase 3	Pre-Operative Intravitreal Bevacizumab for Tractional Retinal Detachment Secondary to Proliferative Diabetic Retinopathy	Tractional Retinal Detachment Secondary to Proliferative Diabetic Retinopathy	Drug: Intravitreal bevacizumab|Procedure: Small-gauge pars plana vitrectomy	J. Fernando Arevalo, MD FACS|Pan American Collaborative Retina Study Group|King Khaled Eye Specialist Hospital		Interventional	https://ClinicalTrials.gov/show/NCT01976923
	Phase 3	Ibrutinib With Rituximab in Adults With WaldenstrÃ¶m's Macroglobulinemia	Waldenström's Macroglobulinemia	Drug: Ibrutinib|Drug: Placebo|Drug: Rituximab	Pharmacyclics LLC.|Janssen Research & Development, LLC		Interventional	https://ClinicalTrials.gov/show/NCT02165397
	Phase 3	Efficacy and Safety of Propranolol Versus Atenolol on the Proliferative Phase of Infantile Hemangioma	Hemangioma	Drug: Propranolol|Drug: Atenolol	West China Hospital		Interventional	https://ClinicalTrials.gov/show/NCT02342275
	Phase 3	Efficacy and Safety of Propranolol Versus Acebutolol on the Proliferative Phase of Infantile Hemangioma	Hemangioma	Drug: Acebutolol|Drug: Propanolol	University Hospital, Montpellier		Interventional	https://ClinicalTrials.gov/show/NCT01743885
	Phase 3	Topical Rapamycin and Calcitriol for Angiofibroma of Tuberous Sclerosis	Facial Angiofibroma	Drug: Rapamycin|Drug: Calcitriol|Drug: Rapamycin-calcitriol combination	National Taiwan University Hospital		Interventional	https://ClinicalTrials.gov/show/NCT03140449
	Phase 3	Antiretroviral Therapy (ART) Alone or With Delayed Chemo Versus ART With Immediate Chemo for Limited AIDS-related Kaposi's Sarcoma	HIV-1 Infection|Kaposi's Sarcoma	Drug: efavirenz/emtricitabine/tenofovir disoproxil fumarate|Drug: etoposide	AIDS Clinical Trials Group|National Institute of Allergy and Infectious Diseases (NIAID)		Interventional	https://ClinicalTrials.gov/show/NCT01352117
	Phase 3	CDD Plus Bortezomib or CDDin Relapsed or Refractory Multiple Myeloma With Extramedullary Plasmacytoma	Extramedullary Plasmacytoma	Drug: CDD|Drug: CDD Plus Bortezomib	Beijing Chao Yang Hospital|Peking University People's Hospital		Interventional	https://ClinicalTrials.gov/show/NCT02336386
	Phase 3	Efficacy of First Line DRC +/- Bortezomib for Patients With Waldenström's Macroglobulinemia	Waldenström's Macroglobulinemia	Drug: Dexamethasone, Rituximab, Cyclophosphamide|Drug: Dexamethasone, Rituximab, Cyclophosphamide, Bortezomib	University of Ulm		Interventional	https://ClinicalTrials.gov/show/NCT01788020
	Phase 3	Phase III Trial of Topical Formulation of Sirolimus to Skin Lesions in Patients With Tuberous Sclerosis Complex (TSC)	Tuberous Sclerosis|Angiofibroma|Hypomelanotic Macule|Plaque	Drug: NPC-12G gel|Drug: Placebo gel	Nobelpharma		Interventional	https://ClinicalTrials.gov/show/NCT02635789
	Phase 3	A Study Comparing BGB-3111 and Ibrutinib in Subjects With Waldenström's Macroglobulinemia (WM)	Waldenström's Macroglobulinemia	Drug: BGB-3111|Drug: Ibrutinib	BeiGene		Interventional	https://ClinicalTrials.gov/show/NCT03053440
	Phase 3	Long-term Trial of Topical Sirolimus to Angiofibroma in Patient With Tuberous Sclerosis Complex	Tuberous Sclerosis|Angiofibroma|Hypomelanotic Macule|Plaque	Drug: NPC-12G gel	Nobelpharma		Interventional	https://ClinicalTrials.gov/show/NCT02634931
	Phase 3	Efficacy and Safety of Ibrutinib in Patients With CLL and Other Indolent B-cell Lymphomas Who Are Chronic Hepatitis B Virus Carriers or Occult Hepatitis B Virus Carriers	Chronic Lymphocytic Leukemia|Indolent B-cell Lymphomas|Chronic Hepatitis B|Lymphoma, Small Lymphocytic|Mantle-Cell Lymphoma|Waldenstrom's Macroglobulinaemia|Follicular Lymphoma	Drug: Ibrutinib	The University of Hong Kong|Janssen, LP		Interventional	https://ClinicalTrials.gov/show/NCT02991638
	Phase 3	Melphalan and Dexamethasone With or Without Bortezomib in Treating Patients With Previously Untreated Systemic Light-Chain Amyloidosis	Light Chain Deposition Disease|Primary Systemic Amyloidosis	Drug: melphalan|Drug: dexamethasone|Drug: bortezomib	National Cancer Institute (NCI)		Interventional	https://ClinicalTrials.gov/show/NCT01078454
	Phase 3	Treatment of Port Wine Stains in Children With Pulsed Dye Laser and Timolol Gel	Melanoma	Drug: Timolol + LCP|Device: LCP	Centre Hospitalier Universitaire de Nice		Interventional	https://ClinicalTrials.gov/show/NCT01272609
	Phase 3	Multicenter Interventional Lymphangioleiomyomatosis (LAM) Early Disease Trial	Dyspnea	Drug: Sirolimus	University of Cincinnati|National Heart, Lung, and Blood Institute (NHLBI)|National Center for Advancing Translational Science (NCATS)|The LAM Foundation		Interventional	https://ClinicalTrials.gov/show/NCT03150914
	Phase 3	Concentrated Citrate Locking to Reduce the Incidence of CVC-related Complications in Hematological Patients	Hematological Malignancies|Bacteremia|Thrombosis	Procedure: heparin|Procedure: concentrated citrate	Maastricht University Medical Center|Dirinco B.V.		Interventional	https://ClinicalTrials.gov/show/NCT01820962
	Phase 3	Metronomic Chemotherapy of Capecitabine After Standard Adjuvant Chemotherapy in Operable Triple Negative Breast Cancer	Breast Cancer|Capecitabine|Triple Negative Breast Cancer		Xijing Hospital|Roche Pharma AG		Observational	https://ClinicalTrials.gov/show/NCT02012634
	Phase 2|Phase 3	Recombine Endostatin With Neoadjuvant Chemotherapy Followed by Concurrent Chemoradiation in Advanced Nasopharynx Cancer	1ã€Enough Cases|2ã€Elekta Precise 1343 Digital Control Electron Linear Accelerator|Can Undertake Nasopharyngeal Carcinoma Specimens in the Materiaï¼Œ|Image Department of Nose Pharynx Ministry MRI Dynamic Testing,	Drug: Recombine Endostatin	Jin Feng|Cancer Hospital of Guizhou Province		Interventional	https://ClinicalTrials.gov/show/NCT01689558
	Phase 2|Phase 3	Neoadjuvant GTX With Chemoradiation for Pancreatic Cancer (Stage II/III)	Pancreatic Cancer Stage II|Pancreatic Cancer Stage III	Drug: Neoadjuvant gemcitabine, capecitabine, and docetaxel|Drug: Gemcitabine, capecitabine, docetaxel followed by radiotherapy	Columbia University		Interventional	https://ClinicalTrials.gov/show/NCT01065870
	Phase 2|Phase 3	TACE vs TACE+SBRT for Unresectable Hepatocellular Cancer	Carcinoma, Hepatocellular	Radiation: SBRT|Procedure: TACE|Drug: Sorafenib	Tata Memorial Hospital		Interventional	https://ClinicalTrials.gov/show/NCT02794337
	Phase 2|Phase 3	Complete Mesocolic Excision With Central Vessel Ligation Compared With Conventional Surgery for Colon Cancer	Colon Cancer	Procedure: Conventional Surgery|Procedure: Complete mesocolic excision with central vascular ligation	Mansoura University		Interventional	https://ClinicalTrials.gov/show/NCT02526836
	Phase 2|Phase 3	Post-operative Adjuvant Treatment for HPV-positive Tumours (PATHOS)	Human Papillomavirus (HPV)-Positive Oropharyngeal Cancer	Drug: Cisplatin|Radiation: Postoperative radiotherapy	Lisette Nixon|Velindre NHS Trust		Interventional	https://ClinicalTrials.gov/show/NCT02215265
	Phase 2|Phase 3	Evaluation of Effects of Silymarin on Cisplatin Induced Nephrotoxicity in Upper Gastrointestinal Adenocarcinoma	Upper GI Cancer|Cisplatin Adverse Reaction	Drug: Silymarin|Drug: Placebo|Drug: chemotherapy	Tehran University of Medical Sciences		Interventional	https://ClinicalTrials.gov/show/NCT01829178
	Phase 2|Phase 3	EUS-guided CGN for Inoperable Cancer	Intractable Abdominal Pain Secondary to Inoperable Malignancy	Procedure: EUS-guided celiac ganglion neurolysis|Procedure: Percutaneous celiac plexus neurolysis|Device: Olympus UM 2000|Device: B-D Quincke Type Point|Drug: Levobupivacaine	Chinese University of Hong Kong		Interventional	https://ClinicalTrials.gov/show/NCT02356640
	Phase 2|Phase 3	Cancer Associated Thrombosis and Isoquercetin (CAT IQ)	Thromboembolism of Vein VTE in Colorectal Cancer|Thromboembolism of Vein in Pancreatic Cancer|Thromboembolism of Vein in Non-small Cell Lung Cancer	Drug: Isoquercetin	Dana-Farber Cancer Institute|Quercegen Pharmaceuticals|National Heart, Lung, and Blood Institute (NHLBI)		Interventional	https://ClinicalTrials.gov/show/NCT02195232
	Phase 2|Phase 3	Transarterial Chemotherapy Compared With Oral Chemotherapy in the Treatment of Advanced Hepatocellular Carcinoma	Hepatocellular Carcinoma	Procedure: Transarterial chemotherapy|Drug: Oral chemotherapy	All India Institute of Medical Sciences, New Delhi|Indian Council of Medical Research		Interventional	https://ClinicalTrials.gov/show/NCT02240771
	Phase 2|Phase 3	Vorinostat, Temozolomide, or Bevacizumab in Combination With Radiation Therapy Followed by Bevacizumab and Temozolomide in Young Patients With Newly Diagnosed High-Grade Glioma	Childhood Cerebellar Anaplastic Astrocytoma|Childhood Cerebral Anaplastic Astrocytoma|Childhood Spinal Cord Neoplasm|Untreated Childhood Brain Stem Glioma|Untreated Childhood Cerebral Astrocytoma	Biological: Bevacizumab|Drug: Temozolomide|Drug: Vorinostat	National Cancer Institute (NCI)		Interventional	https://ClinicalTrials.gov/show/NCT01236560
	Phase 2|Phase 3	Pegylated Liposomal Doxorubicin Hydrochloride With Atezolizumab and/or Bevacizumab in Treating Patients With Recurrent Ovarian, Fallopian Tube, or Primary Peritoneal Cancer	Fallopian Tube Clear Cell Adenocarcinoma|Fallopian Tube Endometrioid Adenocarcinoma|High Grade Fallopian Tube Serous Adenocarcinoma|High Grade Ovarian Serous Adenocarcinoma|Ovarian Clear Cell Adenocarcinoma|Ovarian Endometrioid Adenocarcinoma|Ovarian Seromucinous Carcinoma|Primary Peritoneal High Grade Serous Adenocarcinoma|Recurrent Fallopian Tube Carcinoma|Recurrent Ovarian Carcinoma|Recurrent …	Drug: Atezolizumab|Biological: Bevacizumab|Other: Laboratory Biomarker Analysis|Drug: Pegylated Liposomal Doxorubicin Hydrochloride|Other: Quality-of-Life Assessment	National Cancer Institute (NCI)		Interventional	https://ClinicalTrials.gov/show/NCT02839707
	Phase 2|Phase 3	Sorafenib Chemoembolization Evaluation Controlled Trial	Hepatocellular Carcinoma	Drug: Sorafenib|Procedure: TACE	Fourth Military Medical University		Interventional	https://ClinicalTrials.gov/show/NCT01906216
	Phase 2|Phase 3	Oral Chemotherapy Versus Supportive Therapy In The Treatment Of Unresectable Hepatocellular Carcinoma	Hepatocellular Carcinoma	Drug: Oral|Other: Supportive	All India Institute of Medical Sciences, New Delhi		Interventional	https://ClinicalTrials.gov/show/NCT01438450
	Phase 2|Phase 3	Treatment Optimization in Patients With Untreated Multiple Myeloma	Multiple Myeloma	Drug: Lenalidomide|Drug: Placebo	Lars-Olof Muegge|University of Jena		Interventional	https://ClinicalTrials.gov/show/NCT02145598
	Phase 2|Phase 3	MSC and Cyclophosphamide for Acute Graft-Versus-Host Disease (aGVHD) Prophylaxis	Leukemia|Multiple Myeloma	Drug: Cyclophosphamide|Biological: Mesenchymal stromal cells	National Research Center for Hematology, Russia		Interventional	https://ClinicalTrials.gov/show/NCT02270307
	Phase 2|Phase 3	"Monoclonal Antibodies for Treatment of Multiple Myeloma. Emphasis on the CD38 Antibody Daratumumab "	Multiple Myeloma	Drug: Daratumumab|Drug: Lenalidomide|Drug: Dexamethasone	Vejle Hospital		Interventional	https://ClinicalTrials.gov/show/NCT02419118
	Phase 2|Phase 3	Hypovitaminosis D in Neurocritical Patients	Craniocerebral Trauma|Intracranial Aneurysm|Brain Neoplasms|Spinal Cord Injuries|Seizures|Meningitis|Stroke|Intracranial Hemorrhages|Critical Illness|Vitamin d Deficiency	Drug: Cholecalciferol|Other: Placebo	University of Utah		Interventional	https://ClinicalTrials.gov/show/NCT02881957
	Phase 2|Phase 3	Predictive Value of the "Cytocapacity Test" Patients With Lymphoproliferative Diseases and High-dose Therapy	Hodgkin's Disease|Non-Hodgkin Lymphomas|Multiple Myelomas	Drug: lenograstim	WiSP Wissenschaftlicher Service Pharma GmbH|Ludwig-Maximilians - University of Munich|Chugai Pharma GmbH		Interventional	https://ClinicalTrials.gov/show/NCT01085058
	Phase 2|Phase 3	Trial Comparing Two Protocols of re Irradiation in an Irradiated Area for Carcinoma of the Upper Aerodigestive Tract	Squamous Cell Carcinoma	Radiation: single-fraction radiotherapy with concomitant 5FU and Hydrea|Radiation: hyperfractionated radiotherapy with concomitant Cetuximab	Gustave Roussy, Cancer Campus, Grand Paris|Ministry of Health, France		Interventional	https://ClinicalTrials.gov/show/NCT01211938
	Phase 2|Phase 3	Trial of Sirolimus for Cognitive Impairment in Sturge-Weber Syndrome	Sturge-Weber Syndrome	Drug: Sirolimus	Anne Comi, MD|Children's Hospital Medical Center, Cincinnati|Pfizer|National Institutes of Health (NIH)|Faneca 66 Foundation|National Institute of Neurological Disorders and Stroke (NINDS)|Hugo W. Moser Research Institute at Kennedy Krieger, Inc.		Interventional	https://ClinicalTrials.gov/show/NCT03047980
	Phase 2|Phase 3	Radiation Therapy With or Without Combination Chemotherapy or Pazopanib Hydrochloride Before Surgery in Treating Patients With Newly Diagnosed Non-Rhabdomyosarcoma Soft Tissue Sarcomas That Can Be Removed by Surgery	Adult Fibrosarcoma|Alveolar Soft Part Sarcoma|Angiomatoid Fibrous Histiocytoma|Atypical Fibroxanthoma|Clear Cell Sarcoma of Soft Tissue|Epithelioid Malignant Peripheral Nerve Sheath Tumor|Epithelioid Sarcoma|Extraskeletal Myxoid Chondrosarcoma|Extraskeletal Osteosarcoma|Fibrohistiocytic Neoplasm|Glomus Tumor of the Skin|Inflammatory Myofibroblastic Tumor|Intimal Sarcoma|Leiomyosarcoma|Liposarcoma…	Drug: Doxorubicin Hydrochloride|Drug: Ifosfamide|Other: Laboratory Biomarker Analysis|Drug: Pazopanib Hydrochloride|Other: Pharmacological Study|Radiation: Radiation Therapy|Procedure: Therapeutic Conventional Surgery	National Cancer Institute (NCI)		Interventional	https://ClinicalTrials.gov/show/NCT02180867
	Phase 2|Phase 3	Study to Demonstrate the Efficacy and Safety of Propranolol Oral Solution in Infants With Proliferating Infantile Hemangiomas Requiring Systemic Therapy	Infantile Hemangioma	Drug: Propranolol|Drug: Placebo	Pierre Fabre Dermatology		Interventional	https://ClinicalTrials.gov/show/NCT01056341
	Phase 2|Phase 3	Topical Everolimus in Patients With Tuberous Sclerosis Complex	Facial Angiofibromas	Drug: Everolimus|Drug: Placebo	Hospices Civils de Lyon		Interventional	https://ClinicalTrials.gov/show/NCT02860494
	Phase 2	The Efficacy and Safety of Apatinib in Heavily Pretreated Advanced Non-squamous Non-small Cell Lung Cancer	Non-Small Cell Lung Cancer	Drug: apatinib single agent	Tongji University		Interventional	https://ClinicalTrials.gov/show/NCT02515435
	Phase 2	PRednisone Plus EVerolimus in Patients With Metastatic Renal Cell Cancer After Failure of VEGFR -TKI	Metastatic Renal Cancer	Drug: Prednisone + Everolimus	Istituto Scientifico Romagnolo per lo Studio e la cura dei Tumori		Interventional	https://ClinicalTrials.gov/show/NCT02479490
	Phase 2	Study of Dovitinib and Biomarkers in Advanced Non-Small Cell Lung Cancer or Advanced Colorectal Cancer	Non-Small Cell Lung Cancer|Colorectal Cancer	Drug: Dovitinib	University of California, Davis|Novartis		Interventional	https://ClinicalTrials.gov/show/NCT01676714
	Phase 2	Safety and Efficacy of Sorafenib in Patients With Advanced Thyroid Cancer: a Phase II Clinical Study	Thyroid Cancer	Drug: Sorafenib	Instituto Nacional de Cancerologia, Columbia		Interventional	https://ClinicalTrials.gov/show/NCT02084732
	Phase 2	Safety and Efficacy of VB-111 in Subjects With Advanced Differentiated Thyroid Cancer	Differential Thyroid Cancer	Drug: VB-111	Vascular Biogenics Ltd. operating as VBL Therapeutics		Interventional	https://ClinicalTrials.gov/show/NCT01229865
	Phase 2	Lucitanib (E3810) in Patients With Advanced Cancer and FGFR, VEGFR, or PDGFR Pathway Aberrations	Advanced Cancer	Drug: Lucitanib	Teresa Helsten, MD|Clovis Oncology, Inc.|University of California, San Diego		Interventional	https://ClinicalTrials.gov/show/NCT02747797
	Phase 2	Dual Targeting of Vascular Endothelial Growth Factor-A Together With Angiopoietins in Chemotherapy-naÃ¯ve Metastatic Colorectal Cancer	Metastatic Colorectal Cancer	Drug: AMG386 and bevacizumab	Austin Health		Interventional	https://ClinicalTrials.gov/show/NCT01249521
	Phase 2	TRC105 for Liver Cancer That Has Not Responded to Sorafenib	Hepatocellular Carcinoma|Hepatocellular Cancer|Carcinoma, Hepatocellular	Drug: TRC105	National Cancer Institute (NCI)|National Institutes of Health Clinical Center (CC)		Interventional	https://ClinicalTrials.gov/show/NCT01375569
	Phase 2	A Study to Assess the Efficacy and Safety of the VEGFR-FGFR Inhibitor, Lucitanib, Given to Patients With Advanced/Metastatic Lung Cancer and FGF, VEGF, or PDGF Related Genetic Alterations	Non-Small Cell Lung Cancer|Squamous Non-Small Cell Lung Cancer|NSCLC|Small Cell Lung Cancer|SCLC|Lung Cancer|Advanced Lung Cancer|Metastatic Lung Cancer|Stage IV Lung Cancer	Drug: Lucitanib	Clovis Oncology, Inc.		Interventional	https://ClinicalTrials.gov/show/NCT02109016
	Phase 2	Cabozantinib in Patients With RET Fusion-Positive Advanced Non-Small Cell Lung Cancer and Those With Other Genotypes: ROS1 or NTRK Fusions or Increased MET or AXL Activity	Non-Small Cell Lung Cancer	Drug: Cabozantinib	Memorial Sloan Kettering Cancer Center|Exelixis		Interventional	https://ClinicalTrials.gov/show/NCT01639508
	Phase 2	Preoperative Trial of Sorafenib in Combination With Cisplatin Followed by Paclitaxel for Early Stage Breast Cancer	Breast Cancer	Drug: Sorafenib|Drug: Cisplatin|Drug: Paclitaxel	Emory University|Amgen|Bayer		Interventional	https://ClinicalTrials.gov/show/NCT01194869
	Phase 2	Bevacizumab Plus Somatostatin Analogue and Metronomic Capecitabine in Patients With Advanced Neuroendocrine Tumors	Neuroendocrine Carcinomas	Drug: bevacizumab + octreotide LAR + capecitabine	University of Turin, Italy		Interventional	https://ClinicalTrials.gov/show/NCT01203306
	Phase 2	Predictive Biomarkers of Response to Sunitinib in the Treatment of Poorly-differentiated NEURO-Endocrine Tumors	Neuroendocrine Tumors|Pancreatic Neoplasms|Advanced Disease|Sunitinib	Drug: Sutent	Assistance Publique - Hôpitaux de Paris		Interventional	https://ClinicalTrials.gov/show/NCT01215578
	Phase 2	FLO +/- Pazopanib as First-line Treatment in Advanced Gastric Cancer	Advanced Gastric Cancer	Drug: Pazopanib|Drug: 5-FU, Oxaliplatin, Leukovorin (FLO)	Charite University, Berlin, Germany		Interventional	https://ClinicalTrials.gov/show/NCT01503372
	Phase 2	Phase II Trial of Tivozanib in Advanced Hepatocellular Cancer	Hepatocellular Cancer	Drug: Tivozanib	Emory University|AVEO Pharmaceuticals, Inc.		Interventional	https://ClinicalTrials.gov/show/NCT01807156
	Phase 2	Rh-Endostatin in Combination With Icotinib for Advanced NSCLC With EGFR Mutations	Lung Cancer	Drug: Endostar and icotinib	Zhejiang University|Jiangsu Simcere Pharmaceutical Co., Ltd.|Beta Pharma, Inc.		Interventional	https://ClinicalTrials.gov/show/NCT02375022
	Phase 2	The Impact of Intravenous Anaesthesia on Angiogenesis in Patients With Breast Cancer (TIVA/TCI-BC)	Breast Cancer	Drug: Lidocaine|Drug: Sevoflurane|Drug: TIVA-TCI|Drug: Acetaminophen|Drug: Tramadol|Drug: Neostigmine|Drug: Atropine|Device: BIS	Iuliu Hatieganu University of Medicine and Pharmacy|Prof. Dr. I. Chiricuta Institute of Oncology		Interventional	https://ClinicalTrials.gov/show/NCT02839668
	Phase 2	Nintedanib(BIBF1120) in Thyroid Cancer	Medullary Thyroid Cancer (MTC)|Differentiated Thyroid Cancer (DTC)	Drug: Nintedanib|Drug: Placebo	European Organisation for Research and Treatment of Cancer - EORTC		Interventional	https://ClinicalTrials.gov/show/NCT01788982
	Phase 2	Randomized Study of Doxorubicin and Cyclophosphamide With or Without Intermittent Sunitinib in the First-line Treatment of Locally Advanced or Metastatic Breast Cancer Patients With Measurable Primary Breast Tumor	Breast Cancer	Drug: Arm A|Drug: Arm B	National University Hospital, Singapore		Interventional	https://ClinicalTrials.gov/show/NCT01176799
	Phase 2	Exemestane-RAD001-Metformin	Breast Cancer	Drug: Everolimus|Drug: Exemestane|Drug: Metformin	M.D. Anderson Cancer Center|Susan G. Komen Breast Cancer Foundation		Interventional	https://ClinicalTrials.gov/show/NCT01627067
	Phase 2	Study to Identify Biomarkers of Clinical Response to Aflibercept in Patients With Metastatic Colorectal Cancer	Metastatic Colorectal Cancer	Drug: aflibercept + FOLFIRI	CR-CSSS Champlain-Charles-Le Moyne|Sanofi|Regeneron Pharmaceuticals|Quebec Clinical Research Organization in Cancer		Interventional	https://ClinicalTrials.gov/show/NCT02045030
	Phase 2	Dose Finding and Pharmacokinetics/Pharmacodynamics Study of Apatinib in the Treatment of Advanced Colorectal Cancer	Colorectal Cancer	Drug: Apatinib|Drug: apatinib	Jiangsu HengRui Medicine Co., Ltd.|Fudan University		Interventional	https://ClinicalTrials.gov/show/NCT01531777
	Phase 2	Bevacizumab-containing Regimen for Metastatic Colorectal Cancer Failed to Cytotoxic Treatment	Neoplasm|Colorectal Cancer|Metastatic Neoplasm	Drug: Bevacizumab	Sixth Affiliated Hospital, Sun Yat-sen University		Interventional	https://ClinicalTrials.gov/show/NCT02226289
	Phase 2	The Efficacy and Safety of Apatinib Combined With Etoposide in Heavily Pretreated Advanced Non-small Cell Lung Cancer	Non-small Cell Lung Cancer	Drug: Apatinib|Drug: Etoposide	Third Military Medical University		Interventional	https://ClinicalTrials.gov/show/NCT02733107
	Phase 2	Fulvestrant +/- Vandetanib in Advanced Aromatase Inhibitor Resistant Breast Cancer	Neoplasms	Drug: Fulvestrant|Drug: Vandetanib	Velindre NHS Trust|Cancer Research UK|AstraZeneca		Interventional	https://ClinicalTrials.gov/show/NCT02530411
	Phase 2	A Study of Dovitinib With Androgen Deprivation Therapy (ADT) in Patients With Metastatic Prostate Cancer Receiving Primary ADT	Prostate Cancer	Drug: Standard ADT|Drug: Dovitinib	Oscar Goodman, Jr.|Comprehensive Cancer Centers of Nevada		Interventional	https://ClinicalTrials.gov/show/NCT02065323
	Phase 2	A Study of Apatinib in Patients With Advanced Non-squamous and Non-small Cell Lung Cancer	Non-Small-Cell Lung Cancer	Drug: apatinib|Drug: placebo	Jiangsu HengRui Medicine Co., Ltd.|Sun Yat-sen University		Interventional	https://ClinicalTrials.gov/show/NCT01270386
	Phase 2	A Study of Cediranib and Olaparib at the Time Ovarian Cancer Worsens on Olaparib	Ovarian Cancer	Drug: Olaparib|Drug: Cediranib	University Health Network, Toronto|AstraZeneca		Interventional	https://ClinicalTrials.gov/show/NCT02340611
	Phase 2	Endostatin in Combination With Oxaliplatin and Radiotherapy in Esophageal Cancer Patients.	Esophageal Cancer|Endostatin	Drug: Endostatins|Drug: Oxaliplatin|Radiation: Radiotherapy	Hangzhou Cancer Hospital		Interventional	https://ClinicalTrials.gov/show/NCT02745561
	Phase 2	Vandetanib to Treat Advanced Kidney Cancer	Advanced Clear Cell Renal Carcinoma	Drug: vandetanib	National Cancer Institute (NCI)|National Institutes of Health Clinical Center (CC)		Interventional	https://ClinicalTrials.gov/show/NCT01372813
	Phase 2	Study to Compare Cardiovascular Side Effects of Teysuno Versus Capecitabine	Gastrointestinal Cancer	Drug: Teysuno|Drug: Capecitabine	University of Edinburgh|NHS Lothian		Interventional	https://ClinicalTrials.gov/show/NCT01845337
	Phase 2	Apatinib for Metastatic Esophageal Cancer.	Esophageal Cancer|Metastatic Esophageal Cancer|Apatinib	Drug: Apatinib	Hangzhou Cancer Hospital		Interventional	https://ClinicalTrials.gov/show/NCT02544737
	Phase 2	Clinical Study in Treatment of Malignant Ascites of Ovarian Cancer With Intraperitoneal Injection Bevacizumab Combined With Intraperitoneal Hyperthermic Perfusion Chemotherapy	Ovarian Cancer With Malignant Ascites	Drug: Bevacizumab|Drug: TC:paclitaxel + carboplatin	Chinese PLA General Hospital		Interventional	https://ClinicalTrials.gov/show/NCT01838538
	Phase 2	Perioperative vs Postoperative Chemotherapy + Bevacizumab in Colorectal Cancer, Liver Mets	Colorectal Cancer|Liver Metastasis	Drug: Bevacizumab, mFOLFOX, FOLFIRI|Drug: Bevacizumab, mFOLFOX, FOLFIRI	Yonsei University		Interventional	https://ClinicalTrials.gov/show/NCT01632722
	Phase 2	Bevacizumab, Etoposide and Cisplatin Followed by Whole Brain Radiotherapy in Breast Cancer With Brain Metastases	Breast Cancer|Brain Metastases	Drug: BEEP regimen	National Taiwan University Hospital		Interventional	https://ClinicalTrials.gov/show/NCT02185352
	Phase 2	A Study to Compare Vincristine to Sirolimus for Treatment of High Risk Vascular Tumors	Kaposiform Hemangioendothelioma (KHE)|Kasabach-Merritt Syndrome|Tufted Angioma	Drug: Vincristine|Drug: Sirolimus	Boston Children's Hospital|Pfizer|Food and Drug Administration (FDA)		Interventional	https://ClinicalTrials.gov/show/NCT02110069
	Phase 2	Apatinib as Second-line Treatment of Advanced Pancreatic Cancer	Pancreatic Neoplasms	Drug: Apatinib	First Affiliated Hospital Xi'an Jiaotong University		Interventional	https://ClinicalTrials.gov/show/NCT02726854
	Phase 2	Intrapleural Administration of Bevacizumab Versus Endostar for Pleural Effusions in NSCLC	Non Small Cell Lung Cancer	Drug: Bevacizumab|Drug: recombinant human endostatin	Zhejiang University		Interventional	https://ClinicalTrials.gov/show/NCT02005120
	Phase 2	Ziv-Aflibercept for Advanced Progressive Carcinoid Tumors	Carcinoid Tumor	Drug: Ziv-aflibercept	Dana-Farber Cancer Institute		Interventional	https://ClinicalTrials.gov/show/NCT01782443
	Phase 2	Cabozantinib in Women With Metastatic Hormone-Receptor-Positive Breast Cancer	Breast Cancer	Drug: Cabozantinib|Drug: Fulvestrant	Massachusetts General Hospital|Exelixis		Interventional	https://ClinicalTrials.gov/show/NCT01441947
	Phase 2	Use of Regorafenib in Recurrent Epithelial Ovarian Cancer	Ovarian Neoplasms	Drug: Regorafenib	National Cancer Centre, Singapore		Interventional	https://ClinicalTrials.gov/show/NCT02736305
	Phase 2	A Study to Assess the Safety and Efficacy of the VEGFR-FGFR-PDGFR Inhibitor, Lucitanib, Given to Patients With Metastatic Breast Cancer	Breast Cancer|Metastatic Breast Cancer|MBC|HER2 Positive|HER2|Estrogen Receptor Positive|ER|Triple Negative	Drug: Lucitanib	Clovis Oncology, Inc.		Interventional	https://ClinicalTrials.gov/show/NCT02202746
	Phase 2	ADjuVant Apatinib in Nasopharyngeal Carcinoma Patients With Residual Epstein-Barr Virus (EBV) DNA Following Radiotherapy	Nasopharyngeal Neoplasms	Drug: Apatinib|Drug: Placebo	Sun Yat-sen University|First People's Hospital of Foshan|Guilin Medical University, China		Interventional	https://ClinicalTrials.gov/show/NCT02874651
	Phase 2	Magnetic Resonance Imaging in Measuring the Effect of Cabozantinib on Bone Metastases in Patients With Castrate Resistant Prostate Cancer	Bone Metastases|Castrate-resistant Prostate Cancer|Recurrent Prostate Cancer|Stage IV Prostate Cancer	Drug: cabozantinib|Other: laboratory biomarker analysis|Procedure: magnetic resonance imaging	University of Chicago|NorthShore University HealthSystem		Interventional	https://ClinicalTrials.gov/show/NCT01599793
	Phase 2	Cisplatin and Gemcitabine With or Without Bevacizumab in EGFR Wild-type Non-Small Cell Lung Cancer	Lung Cancer	Drug: cisplatin and gemcitabine combination with Bevacizumab|Drug: Gemcitabine combined with cisplatin chemotherapy	Sichuan Cancer Hospital and Research Institute		Interventional	https://ClinicalTrials.gov/show/NCT01623102
	Phase 2	A Study of Vemurafenib (RO5185426) in Participants With Metastatic or Unresectable Papillary Thyroid Cancer Positive for the BRAF V600 Mutation	Neoplasms	Drug: Vemurafenib	Hoffmann-La Roche		Interventional	https://ClinicalTrials.gov/show/NCT01286753
	Phase 2	A Phase II Study of 250-mg ZD1839 Monotherapy in Recurrent or Metastatic or Both Recurrent and Metastatic Squamous Cell Carcinoma	Head and Neck Cancer	Drug: ZD1839 (IRESSA)	University of Chicago		Interventional	https://ClinicalTrials.gov/show/NCT01185158
	Phase 2	Study of Atezolizumab + Bevacizumab in Patients With Advanced Non-Clear Cell Renal Cell Carcinoma	Advanced Non-Clear Cell Kidney Cancer	Drug: Bevacizumab|Drug: Atezolizumab	Dana-Farber Cancer Institute|Genentech, Inc.		Interventional	https://ClinicalTrials.gov/show/NCT02724878
	Phase 2	AMG 386 and Abiraterone for Advanced Prostate Cancer	Prostatic Neoplams|Prostate Cancer|Neoplasm, Prostate|Neoplasm,Prostatic	Drug: AMG 386|Drug: Abiraterone|Drug: Prednisone	National Cancer Institute (NCI)|National Institutes of Health Clinical Center (CC)		Interventional	https://ClinicalTrials.gov/show/NCT01553188
	Phase 2	Phase II Study of Clinical Activity of Pegaspargase in Women With Relapsed or Refractory Epithelial Ovarian Cancer, Fallopian Tube Cancer, and/or Primary Peritoneal Cancer	Ovarian Neoplasms|Fallopian Tube Neoplasms|Primary Peritoneal Neoplasms	Drug: Pegylated L-Asparaginase	National Cancer Institute (NCI)|National Institutes of Health Clinical Center (CC)		Interventional	https://ClinicalTrials.gov/show/NCT01313078
	Phase 2	Phase II Trial Evaluating OS With TherasphereÂ® + 2nd-Line FOLFOX in Pancreatic Liver Mets	Liver Cancer|Pancreatic Cancer	Drug: FOLFOX7 (Folinic acid, 5-Fluorouracil, and Oxaliplatin)|Device: TheraSpheres	H. Lee Moffitt Cancer Center and Research Institute|BTG International Inc.		Interventional	https://ClinicalTrials.gov/show/NCT01581307
	Phase 2	Radiation Therapy (XRT) and ZD6474 in Non-Small Cell Lung Cancer (NSCLC): Phase II	Non-Small Cell Lung Cancer	Drug: ZD6474 (ZACTIMA)|Radiation: Radiation Therapy	M.D. Anderson Cancer Center|AstraZeneca		Interventional	https://ClinicalTrials.gov/show/NCT02087839
	Phase 2	Tivozanib As Maintenance Therapy In GYN	Ovarian Cancer|Fallopian Tube Cancer|Primary Peritoneal Carcinoma	Drug: Tivozanib	Dana-Farber Cancer Institute|National Comprehensive Cancer Network|AVEO Pharmaceuticals, Inc.		Interventional	https://ClinicalTrials.gov/show/NCT01972516
	Phase 2	Pazopanib in Patients With Relapsed or Refractory Small Cell Lung Cancer	Small Cell Lung Cancer|Lung Cancer|SCLC	Drug: Pazopanib	Dana-Farber Cancer Institute|Massachusetts General Hospital|Brigham and Women's Hospital|Beth Israel Deaconess Medical Center|GlaxoSmithKline		Interventional	https://ClinicalTrials.gov/show/NCT01253369
	Phase 2	Efficacy and Safety of Bevacizumab (AvastinÂ®) Combined to Weekly Paclitaxel Followed by Bevacizumab (AvastinÂ®) Alone in Patients With Relapsed Ovarian Sex-cord Stromal Tumours (ALIENOR)	Ovarian Sex-cord Stromal Tumor	Drug: Paclitaxel|Drug: Bevacizumab	ARCAGY/ GINECO GROUP|Roche Pharma AG		Interventional	https://ClinicalTrials.gov/show/NCT01770301
	Phase 2	A Phase II Study of Cabozantinib (XL184) Therapy in Castrate Resistant Prostate Cancer (CRPC) With Visceral Metastases	Prostate Cancer	Drug: Cabozantinib	Edwin Posadas, MD|Cedars-Sinai Medical Center		Interventional	https://ClinicalTrials.gov/show/NCT01834651
	Phase 2	Statin Therapy in Young Adult Survivors of Childhood Cancer	Cardiovascular Disease|Childhood ALL|Childhood NHL	Drug: Atorvastatin|Drug: Sugar Pill (Placebo)	University of Minnesota - Clinical and Translational Science Institute		Interventional	https://ClinicalTrials.gov/show/NCT01733953
	Phase 2	Neoadjuvant Pemetrexed, Carboplatin and Bevacizumab in Unresectable, Locally Advanced Lung Adenocarcinoma	Lung Cancer	Drug: Neoadjuvant Bevacizumab	Si-Yu Wang|Sun Yat-sen University		Interventional	https://ClinicalTrials.gov/show/NCT01588704
	Phase 2	Nintedanib in Patients With Advanced Esophagogastric Cancer	Esophagogastric Adenocarcinoma	Drug: Nintedanib	Memorial Sloan Kettering Cancer Center		Interventional	https://ClinicalTrials.gov/show/NCT02234596
	Phase 2	FOLFOX +/- Ziv-Aflibercept for Esophageal and Gastric Cancer	Esophageal Cancer|Gastric Cancer	Drug: Oxaliplatin|Drug: Folinic Acid|Drug: 5-Fluorouracil|Drug: Ziv-aflibercept|Drug: Ziv-aflibercept Placebo	Dana-Farber Cancer Institute		Interventional	https://ClinicalTrials.gov/show/NCT01747551
	Phase 2	Nintedanib in Treating Patients With Locally Advanced or Metastatic Neuroendocrine Tumors	Carcinoid Tumor|Metastatic Carcinoid Tumor|Neuroendocrine Neoplasm	Other: Laboratory Biomarker Analysis|Drug: Nintedanib|Other: Pharmacological Study|Other: Quality-of-Life Assessment	Roswell Park Cancer Institute|National Cancer Institute (NCI)		Interventional	https://ClinicalTrials.gov/show/NCT02399215
	Phase 2	Phase 2 Study of G-202 in Patients With Chemotherapy-NaÃ¯ve Metastatic Castrate-Resistant Prostate Cancer	Prostate Cancer.	Drug: G-202	GenSpera, Inc.		Interventional	https://ClinicalTrials.gov/show/NCT01734681
	Phase 2	A Phase 2 Trial of Regorafenib as A Single Agent in Advanced and Metastatic Biliary Tract Carcinoma/Cholangiocarcinoma Patients Who Have Failed First-line Chemotherapy	Metastatic Biliary Tract Carcinoma	Drug: Regorafenib	University of Pittsburgh|Bayer		Interventional	https://ClinicalTrials.gov/show/NCT02053376
	Phase 2	A Study of RO4929097 in Patients With Advanced Renal Cell Carcinoma That Have Failed Vascular Endothelial Growth Factor (VEGF)/Vascular Endothelial Growth Factor Receptor (VEGFR) Therapy	Clear Cell Renal Cell Carcinoma|Recurrent Renal Cell Carcinoma|Stage IV Renal Cell Cancer	Drug: Gamma-Secretase Inhibitor RO4929097|Other: Laboratory Biomarker Analysis	National Cancer Institute (NCI)		Interventional	https://ClinicalTrials.gov/show/NCT01141569
	Phase 2	Study of Propranolol in Newly Diagnosed Breast Cancer Patients Undergoing Neoadjuvant Chemotherapy	Locally Advanced Malignant Neoplasm|Breast Cancer	Drug: Propranolol|Other: DOT imaging|Drug: Paclitaxel|Drug: Nab-paclitaxel|Drug: Trastuzumab|Drug: Pertuzumab|Drug: Doxorubicin|Drug: Cyclophosphamide|Procedure: Surgery|Drug: Premedication|Drug: Anti-nausea therapy|Drug: Pegfilgrastim	Columbia University		Interventional	https://ClinicalTrials.gov/show/NCT01847001
	Phase 2	Levocetirizine + Capecitabine + Bevacizumab for Patients With Refractory Colorectal Cancer	Colorectal Neoplasms	Drug: Bevacizumab|Drug: Capecitabine|Drug: Levocetirizine	Washington University School of Medicine		Interventional	https://ClinicalTrials.gov/show/NCT01722162
	Phase 2	Docetaxel With or Without Low-dose, Short Course Sunitinib in Refractory Solid Tumors	Solid Tumors|Breast Cancer|Non-small Cell Lung Cancer|Prostate Cancer|Gastric Cancer	Drug: Docetaxel|Drug: Sunitinib	National University Hospital, Singapore		Interventional	https://ClinicalTrials.gov/show/NCT01803503
	Phase 2	Cabozantinib in Advanced Pancreatic Neuroendocrine and Carcinoid Tumors	Carcinoid Tumor|Pancreatic Neuroendocrine Tumor	Drug: Cabozantinib	Massachusetts General Hospital		Interventional	https://ClinicalTrials.gov/show/NCT01466036
	Phase 2	Ziv-Aflibercept Followed by Ziv-Aflibercept, Fluorouracil, and Leucovorin Calcium in Treating Patients With Stage IV Colorectal Cancer	Mucinous Adenocarcinoma of the Colon|Mucinous Adenocarcinoma of the Rectum|Recurrent Colon Cancer|Recurrent Rectal Cancer|Signet Ring Adenocarcinoma of the Colon|Signet Ring Adenocarcinoma of the Rectum|Stage IVA Colon Cancer|Stage IVA Rectal Cancer|Stage IVB Colon Cancer|Stage IVB Rectal Cancer	Biological: ziv-aflibercept|Drug: leucovorin calcium|Drug: fluorouracil|Other: laboratory biomarker analysis	University of Southern California|National Cancer Institute (NCI)		Interventional	https://ClinicalTrials.gov/show/NCT02235324
	Phase 2	Erlotinib Hydrochloride With or Without Bevacizumab in Treating Patients With Stage IV Non-small Cell Lung Cancer With Epidermal Growth Factor Receptor Mutations	EGFR Activating Mutation|Stage IV Non-Small Cell Lung Cancer	Biological: Bevacizumab|Drug: Erlotinib Hydrochloride|Other: Laboratory Biomarker Analysis	Academic and Community Cancer Research United|National Cancer Institute (NCI)		Interventional	https://ClinicalTrials.gov/show/NCT01532089
	Phase 2	Methylprednisolone N Acetylcysteine in Hepatic Resections	Ischemic Reperfusion Injury|Insufficiency; Hepatic, Postoperative|Liver Tumour	Drug: Methylprednisolone|Drug: N-acetylcysteine	Istituto Clinico Humanitas		Interventional	https://ClinicalTrials.gov/show/NCT01726465
	Phase 2	Efficacy And Safety Of Xeliri + Avastin Followed By Xelox + Avastin Or Reverse Sequence In Metastatic Colorectal Cancer	Metastatic Colorectal Cancer	Drug: Capecitabine|Drug: Capecitabine|Drug: Bevacizumab|Drug: Oxaliplatin|Drug: Irinotecan	Prof. Dr. Werner Scheithauer|Medical University of Vienna		Interventional	https://ClinicalTrials.gov/show/NCT02119026
	Phase 2	Modulation of Autophagy in Patients With Advanced/Recurrent Non-small Cell Lung Cancer - Phase II	Non-small Cell Lung Cancer|Advanced Non-small Cell Lung Cancer|Recurrent Non-small Cell Lung Cancer	Drug: Paclitaxel|Drug: Carboplatin|Drug: Hydroxychloroquine|Drug: Bevacizumab	Rutgers, The State University of New Jersey|National Cancer Institute (NCI)|Rutgers Cancer Institute of New Jersey		Interventional	https://ClinicalTrials.gov/show/NCT01649947
	Phase 2	Dendritic Cell Vaccines + Dasatinib for Metastatic Melanoma	Metastatic Melanoma	Biological: DC vaccine|Drug: Dasatinib	Walter J. Storkus|National Cancer Institute (NCI)|University of Pittsburgh		Interventional	https://ClinicalTrials.gov/show/NCT01876212
	Phase 2	Perioperative Chemotherapy With Bevacizumab for Colorectal Carcinomatosis	Colorectal Neoplasms	Drug: perioperative chemotherapy plus bevacizumab|Procedure: cytoreductive surgery|Drug: Intraperitoneal Oxaliplatin	University Hospital, Ghent		Interventional	https://ClinicalTrials.gov/show/NCT02399410
	Phase 2	Multi-Arm Study to Test the Efficacy of Immunotherapeutic Agents in Multiple Sarcoma Subtypes	Advanced and/or Metastatic Sarcoma	Drug: Durvalumab|Drug: Tremelimumab	M.D. Anderson Cancer Center|MedImmune LLC		Interventional	https://ClinicalTrials.gov/show/NCT02815995
	Phase 2	Cabozantinib in Advanced Solid Malignancies	Lung Cancer|Solid Tumor (Not Breast or Prostate Cancers)	Drug: Cabozantinib	Massachusetts General Hospital		Interventional	https://ClinicalTrials.gov/show/NCT01588821
	Phase 2	Apatinib for Advanced Soft Tissue Sarcoma Patients: a Phase 2, Multicenter Trial	Soft Tissue Sarcoma Adult|Advanced Cancer	Drug: Apatinib	Peking University People's Hospital|Peking University Shougang Hospital|Peking University International Hospital		Interventional	https://ClinicalTrials.gov/show/NCT03104335
	Phase 2	Sipuleucel-T With or Without Tasquinimod in Treating Patients With Metastatic Hormone-Resistant Prostate Cancer	Hormone-Resistant Prostate Cancer|Metastatic Prostate Carcinoma|Recurrent Prostate Carcinoma|Stage IV Prostate Cancer	Other: Laboratory Biomarker Analysis|Biological: Sipuleucel-T|Drug: Tasquinimod	Roswell Park Cancer Institute|National Cancer Institute (NCI)|Active Biotech AB		Interventional	https://ClinicalTrials.gov/show/NCT02159950
	Phase 2	Changes in Tumor Tissue and Serum Biomarkers Before and After Cetuximab Combined With Preoperative Radiotherapy in Locally Advanced Thoracic Esophageal Squamous Cell Carcinoma	Locally Advanced Thoracic Middle-lower Segment Esophageal Squamous Cell Carcinoma	Radiation: preoperative radiotherapy|Drug: cetuximab	Sichuan Cancer Hospital and Research Institute|Daping Hospital and the Research Institute of Surgery of the Third Military Medical University|Affiliated Tumor Hospital of Guangzhou Medical University|Southwest Hospital, China|Xinqiao Hospital of Chongqing		Interventional	https://ClinicalTrials.gov/show/NCT02123381
	Phase 2	Efficacy and Safety Study of Bevacizumab Plus Chemotherapy in EGFR-TKI Resistant Non-Squamous Non-Small Cell Lung Cancer	Lung, Carcinoma	Drug: Bevacizumab	Sun Yat-sen University|First Affiliated Hospital, Sun Yat-Sen University|Second Affiliated Hospital, Sun Yat-Sen University		Interventional	https://ClinicalTrials.gov/show/NCT02139579
	Phase 2	Trebananib With or Without Bevacizumab, Pazopanib Hydrochloride, Sorafenib Tosylate, or Sunitinib Malate in Treating Patients With Advanced Kidney Cancer	Recurrent Renal Cell Carcinoma|Stage III Renal Cell Cancer|Stage IV Renal Cell Cancer	Biological: Bevacizumab|Other: Laboratory Biomarker Analysis|Drug: Pazopanib Hydrochloride|Other: Pharmacological Study|Drug: Sorafenib Tosylate|Drug: Sunitinib Malate|Biological: Trebananib	National Cancer Institute (NCI)		Interventional	https://ClinicalTrials.gov/show/NCT01664182
	Phase 2	Irinotecan -Eluting LC Bead-M1 (DEBIRI-M1) for Patients With Liver Metastases From Colorectal Cancer	Colorectal Cancer	Drug: DEBIRI|Device: LC Bead M1|Procedure: TACE	Yale University		Interventional	https://ClinicalTrials.gov/show/NCT02015754
	Phase 2	The Study of CIK Plus S-1 and Bevacizumab as Maintenance Treatment for Patients With Advanced Colorectal Cancer	Colorectal Neoplasms	Biological: Cytokine-Induced Killer Cells	The First People's Hospital of Changzhou		Interventional	https://ClinicalTrials.gov/show/NCT02487992
	Phase 2	Consolidation Therapy With Hu3S193 for Women With Ovarian, Primary Peritoneal or Fallopian Tube Cancer	Fallopian Tube Cancer|Ovarian Cancer|Peritoneal Cavity Cancer	Biological: Monoclonal antibody Hu3S193	Recepta Biopharma		Interventional	https://ClinicalTrials.gov/show/NCT01137071
	Phase 2	Cabozantinib for Advanced Urothelial Cancer	Urothelial Carcinoma|Urethral Neoplasms|Ureteral Neoplasms|Urinary Bladder Neoplasms|Kidney Neoplasms	Drug: Cabozantinib	National Cancer Institute (NCI)|National Institutes of Health Clinical Center (CC)		Interventional	https://ClinicalTrials.gov/show/NCT01688999
	Phase 2	SF1126 in Recurrent or Progressive SCCHN and Mutations in PIK3CA Gene and/or PI-3 Kinase Pathway Genes	Metastatic Squamous Neck Cancer With Occult Primary Squamous Cell Carcinoma	Drug: SF1126	Ezra Cohen|SignalRX Pharmaceuticals, Inc.|University of California, San Diego		Interventional	https://ClinicalTrials.gov/show/NCT02644122
	Phase 2	Sorafenib + mFOLFOX for Hepatocellular Carcinoma	Hepatocellular Cancer	Drug: Leucovorin|Drug: Fluorouracil|Drug: Oxaliplatin|Drug: Sorafenib	Massachusetts General Hospital		Interventional	https://ClinicalTrials.gov/show/NCT01775501
	Phase 2	A Study Combining mFOLFOX6 With Tivozanib or Bevacizumab in Patients With Metastatic Colorectal Cancer as First Line Therapy	Colorectal Cancer	Drug: Tivozanib|Drug: Bevacizumab|Drug: mFOLFOX6	AVEO Pharmaceuticals, Inc.		Interventional	https://ClinicalTrials.gov/show/NCT01478594
	Phase 2	MLN0128 and MLN0128 + MLN1117 Compared With Everolimus in the Treatment of Adults With Advanced or Metastatic Clear-Cell Renal Cell Carcinoma	Clear-cell Metastatic Renal Cell Carcinoma	Drug: Everolimus|Drug: MLN0128|Drug: MLN1117	Millennium Pharmaceuticals, Inc.|Takeda		Interventional	https://ClinicalTrials.gov/show/NCT02724020
	Phase 2	Lower or Standard Dose Regorafenib in Treating Patients With Refractory Metastatic Colorectal Cancer	Colon Adenocarcinoma|Rectal Adenocarcinoma|Stage III Colorectal Cancer|Stage IIIA Colorectal Cancer|Stage IIIB Colorectal Cancer|Stage IIIC Colorectal Cancer|Stage IV Colorectal Cancer|Stage IVA Colorectal Cancer|Stage IVB Colorectal Cancer	Drug: Clobetasol Propionate|Other: Pharmacological Study|Other: Quality-of-Life Assessment|Drug: Regorafenib	Academic and Community Cancer Research United|National Cancer Institute (NCI)		Interventional	https://ClinicalTrials.gov/show/NCT02368886
	Phase 2	Pomalidomide for Lenalidomide for Failures	Multiple Myeloma	Drug: POM|Drug: Steroids|Drug: PLD|Drug: CFZ|Drug: BTZ|Drug: CLA|Drug: Other drugs	Oncotherapeutics|Celgene Corporation		Interventional	https://ClinicalTrials.gov/show/NCT02188368
	Phase 2	A Safety and Effectiveness Study of Pre-operative Artesunate in Stage II/III Colorectal Cancer	Colorectal Cancer|Bowel Cancer	Drug: Artesunate 200mg|Drug: Placebo	St George's, University of London		Interventional	https://ClinicalTrials.gov/show/NCT02633098
	Phase 2	TRC105 in Adults With Advanced/Metastatic Urothelial Carcinoma	Urothelial Carcinoma|Ureteral Neoplasms|Ureter Cancer|Neoplasm, Ureteral|Cancer of the Ureter	Drug: TRC105	National Cancer Institute (NCI)|National Institutes of Health Clinical Center (CC)		Interventional	https://ClinicalTrials.gov/show/NCT01328574
	Phase 2	Effect of Colchicine for the Palliative Management of Hepatocellular Carcinoma	Hepatocellular Carcinoma|Metastasis|Invasion	Drug: Colchicine	Kaohsiung Medical University Chung-Ho Memorial Hospital		Interventional	https://ClinicalTrials.gov/show/NCT01935700
	Phase 2	Pazopanib Versus Temsirolimus in Poor-Risk Clear-Cell Renal Cell Carcinoma (RCC)	Kidney Cancer	Drug: Pazopanib|Drug: Temsirolimus|Behavioral: Quality of Life Assessment|Drug: Benadryl	M.D. Anderson Cancer Center|Novartis		Interventional	https://ClinicalTrials.gov/show/NCT01392183
	Phase 2	Lenalidomide With or Without Ixazomib Citrate and Dexamethasone in Treating Patients With Residual Multiple Myeloma After Donor Stem Cell Transplant	Plasma Cell Myeloma|Residual Disease	Drug: Ixazomib Citrate|Drug: Lenalidomide|Drug: Dexamethasone	University of Chicago|National Cancer Institute (NCI)|Multiple Myeloma Research Foundation		Interventional	https://ClinicalTrials.gov/show/NCT02389517
	Phase 2	Irinotecan Plus Brivanib in Metastatic Colorectal Cancer (CRC) Enriched for Elevated Levels of Plasma FGF	Colorectal Cancer|Colorectal Adenocarcinoma	Drug: Brivanib|Drug: Irinotecan	M.D. Anderson Cancer Center|Bristol-Myers Squibb		Interventional	https://ClinicalTrials.gov/show/NCT01367275
	Phase 2	A Study of ENMD-2076 in Ovarian Clear Cell Cancers	Ovarian Clear Cell Carcinoma	Drug: ENMD-2076	University Health Network, Toronto		Interventional	https://ClinicalTrials.gov/show/NCT01914510
	Phase 2	A Study of Aflibercept in Combination With FOLFIRI in Patients With Second-Line Metastatic Colorectal Cancer in Japan	Colorectal Cancer Metastatic	Drug: Aflibercept|Drug: Levofolinate|Drug: Irinotecan|Drug: 5-FU	Sanofi|Regeneron Pharmaceuticals		Interventional	https://ClinicalTrials.gov/show/NCT01882868
	Phase 2	HIPEC as Neoadjuvant Treatment for Resectable Pancreatic Adenocarcinoma	Pancreatic Neoplasms|Pancreatic Adenocarcinoma	Procedure: Hyperthermic intraperitoneal chemotherapy|Procedure: Open pancreaticoduodenectomy|Drug: Gemcitabine	Carolinas Medical Center		Interventional	https://ClinicalTrials.gov/show/NCT02850874
	Phase 2	Study of Acute Peripheral Vascular Effects, Safety and Tolerability in Subjects With Raynaud's Phenomenon Secondary to Systemic Sclerosis	Raynaud's Phenomenon Secondary to Systemic Sclerosis	Drug: Alprostadil|Other: Placebo	NexMed (U.S.A.), Inc. (subsidiary of Apricus Biosciences, Inc.)		Interventional	https://ClinicalTrials.gov/show/NCT02228850
	Phase 2	Aflibercept and FOLFOX6 Treatment for Previously Untreated Stage IV Colorectal Cancer	Mucinous Adenocarcinoma of the Colon|Mucinous Adenocarcinoma of the Rectum|Signet Ring Adenocarcinoma of the Colon|Signet Ring Adenocarcinoma of the Rectum|Stage IV Colon Cancer|Stage IV Rectal Cancer	Biological: aflibercept|Drug: oxaliplatin|Drug: leucovorin|Drug: fluorouracil|Other: Correlative Studies|Procedure: DCE MRI|Radiation: f18FDG-PET|Procedure: PET (positron emission tomography)	Kristen Ciombor|Sanofi|Ohio State University Comprehensive Cancer Center		Interventional	https://ClinicalTrials.gov/show/NCT01652196
	Phase 2	The Effect of Non-Steroidal Anti-Inflammatory Drug Naproxen on Pleural Effusion Formation After Lung Resection	Pleural Effusion|Pleural Effusion Malignant	Drug: Naproxen|Drug: Placebo	McMaster University|McMaster Surgical Associates		Interventional	https://ClinicalTrials.gov/show/NCT01612975
	Phase 2	Oral Steroids for Regorafenib-induced Fatigue/Malaise in Unresectable mCRC (KSCC1402/HGCSG1402)	Rectal Cancer	Other: General condition|Other: Blood pressure|Other: Patient Reported Outcome|Other: Clinical findings|Other: Hematology/blood chemistry|Other: Coagulation and fibrinolysis system|Other: Urinalysis|Other: Medication check|Other: Adverse event|Other: Thyroid function test|Other: Contrast-enhanced torso CT|Other: Brain MRI|Drug: Dexamethasone|Drug: Regorafenib|Drug: Placebo|Drug: Proton pump inhib…	Clinical Research Support Center Kyush		Interventional	https://ClinicalTrials.gov/show/NCT02288078
	Phase 2	Vessel Sparing Prostate Radiation Therapy	Cancer of the PROSTATE	Radiation: Radiation Therapy	University of Michigan Cancer Center		Interventional	https://ClinicalTrials.gov/show/NCT02958787
	Phase 2	Pembrolizumab, Bevacizumab, and Cyclophosphamide in Treating Patients With Recurrent Ovarian, Fallopian Tube, or Primary Peritoneal Cancer	Fallopian Tube Clear Cell Adenocarcinoma|Fallopian Tube Endometrioid Adenocarcinoma|Fallopian Tube Mucinous Adenocarcinoma|Fallopian Tube Serous Adenocarcinoma|Ovarian Clear Cell Adenocarcinoma|Ovarian Endometrioid Adenocarcinoma|Ovarian Mucinous Adenocarcinoma|Ovarian Serous Adenocarcinoma|Primary Peritoneal Serous Adenocarcinoma|Recurrent Fallopian Tube Carcinoma|Recurrent Ovarian Carcinoma|Rec…	Biological: Bevacizumab|Drug: Cyclophosphamide|Other: Laboratory Biomarker Analysis|Biological: Pembrolizumab	Roswell Park Cancer Institute|National Cancer Institute (NCI)		Interventional	https://ClinicalTrials.gov/show/NCT02853318
	Phase 2	Ramucirumab/Paclitaxel as Second-line Treatment in Metastatic Gastric or Gastroesophageal Junction Adenocarcinoma With Integrative Genomic Analysis	Gastric Adenocarcinoma|Gastroesophageal Junction Adenocarcinoma	Drug: Ramucirumab|Drug: Paclitaxel	Samsung Medical Center		Interventional	https://ClinicalTrials.gov/show/NCT02628951
	Phase 2	Neoadjuvant CCRT With/Without Bevacizumab for Locally Advanced ESCC	Stage III Esophageal Squamous Cell Carcinoma	Drug: BPF-CCRT (run-in)|Drug: BPF-CCRT (randomized)|Drug: PF-CCRT (randomized)	National Taiwan University Hospital		Interventional	https://ClinicalTrials.gov/show/NCT02812641
	Phase 2	Study for the Evaluation of Efficacy of Pembrolizumab (MK-3475) in Patients With Rare Tumors	Advanced Cancers	Drug: Pembrolizumab|Behavioral: Phone Call Follow-Up	M.D. Anderson Cancer Center|Merck Sharp & Dohme Corp.		Interventional	https://ClinicalTrials.gov/show/NCT02721732
	Phase 2	A Phase 2 Study of ASONEPâ„¢ to Treat Unresectable and Refractory Renal Cell Carcinoma	Renal Cell Carcinoma	Drug: ASONEP	Lpath, Inc.		Interventional	https://ClinicalTrials.gov/show/NCT01762033
	Phase 2	Standard Care Alone or With Acupuncture for CIPN in Breast Cancer and Multiple Myeloma	Breast Cancer|Multiple Myeloma|Gastrointestinal Cancer	Procedure: Acupuncture|Other: Medication taken to manage the symptom burden of CIPN	The Christie NHS Foundation Trust		Interventional	https://ClinicalTrials.gov/show/NCT02275403
	Phase 2	Bevacizumab With or Without Fosbretabulin Tromethamine in Treating Patients With Recurrent or Persistent Ovarian Epithelial, Fallopian Tube, or Peritoneal Cavity Cancer	Recurrent Fallopian Tube Carcinoma|Recurrent Ovarian Carcinoma|Recurrent Primary Peritoneal Carcinoma	Biological: Bevacizumab|Drug: Fosbretabulin Tromethamine|Other: Laboratory Biomarker Analysis	National Cancer Institute (NCI)		Interventional	https://ClinicalTrials.gov/show/NCT01305213
	Phase 2	FMISO PET Study of Glioblastoma	Recurrent Glioblastoma	Device: FMISO PET|Device: MRI|Drug: Bevacizumab|Drug: CCNU	Massachusetts General Hospital|National Cancer Institute (NCI)		Interventional	https://ClinicalTrials.gov/show/NCT02076152
	Phase 2	Oral Apixaban (Eliquis) Versus Enoxaparin (Lovenox) for Thromboprophylaxis in Women With Suspected Pelvic Malignancy	Gynecologic Cancer|Venous Thromboembolism	Drug: Oral apixaban|Drug: Subcutaneous enoxaparin	University of Colorado, Denver|Bristol-Myers Squibb		Interventional	https://ClinicalTrials.gov/show/NCT02366871
	Phase 2	Cediranib Maleate in Treating Patients With Recurrent or Persistent Endometrial Cancer	Endometrial Adenocarcinoma|Endometrial Adenosquamous Carcinoma|Endometrial Clear Cell Adenocarcinoma|Endometrial Serous Adenocarcinoma|Recurrent Uterine Corpus Carcinoma	Drug: Cediranib Maleate|Other: Laboratory Biomarker Analysis	National Cancer Institute (NCI)		Interventional	https://ClinicalTrials.gov/show/NCT01132820
	Phase 2	Cabozantinib for Plexiform Neurofibromas (PN) in Subjects With NF1 (16 Years +)	NF1|Neurofibromatosis|Plexiform Neurofibromas	Drug: Cabozantinib	University of Alabama at Birmingham		Interventional	https://ClinicalTrials.gov/show/NCT02101736
	Phase 2	Cabozantinib-S-Malate in Treating Younger Patients With Recurrent, Refractory, or Newly Diagnosed Sarcomas, Wilms Tumor, or Other Rare Tumors	Adrenal Cortex Carcinoma|Adult Alveolar Soft Part Sarcoma|Adult Clear Cell Sarcoma of Soft Parts|Adult Hepatocellular Carcinoma|Adult Rhabdomyosarcoma|Adult Soft Tissue Sarcoma|Childhood Alveolar Soft Part Sarcoma|Childhood Central Nervous System Neoplasm|Childhood Clear Cell Sarcoma of Soft Parts|Childhood Hepatocellular Carcinoma|Childhood Rhabdomyosarcoma|Childhood Soft Tissue Sarcoma|Childhoo…	Drug: Cabozantinib S-malate|Other: Laboratory Biomarker Analysis|Other: Pharmacological Study	National Cancer Institute (NCI)		Interventional	https://ClinicalTrials.gov/show/NCT02867592
	Phase 2	Cabozantinib-S-Malate in Treating Patients With Recurrent or Progressive Ovarian, Fallopian Tube, or Primary Peritoneal Cancer	Fallopian Tube Clear Cell Adenocarcinoma|Ovarian Clear Cell Adenocarcinoma|Recurrent Fallopian Tube Carcinoma|Recurrent Ovarian Carcinoma|Recurrent Primary Peritoneal Carcinoma	Drug: Cabozantinib S-malate|Other: Laboratory Biomarker Analysis	National Cancer Institute (NCI)		Interventional	https://ClinicalTrials.gov/show/NCT02315430
	Phase 2	Study of Bevacizumab + mFOLFOX6 Versus Bevacizumab + FOLFIRI With Biomarker Stratification in Participants With Previously Untreated Metastatic Colorectal Cancer (mCRC)	Colorectal Cancer	Drug: 5-Fluorouracil|Drug: Bevacizumab|Drug: Irinotecan|Drug: Leucovorin|Drug: Oxaliplatin|Drug: Capecitabine	Genentech, Inc.		Interventional	https://ClinicalTrials.gov/show/NCT01374425
	Phase 2	Anticoagulation Length in Cancer Associated Thrombosis	Cancer|Thrombosis|Venous Thromboembolism|Deep Vein Thrombosis|Pulmonary Embolus	Drug: Low Molecular Weight Heparin (LMWH)	Cardiff University|National Institute for Health Research, United Kingdom|Wales Cancer Trials Unit		Interventional	https://ClinicalTrials.gov/show/NCT01817257
	Phase 2	Cabozantinib +/- Trastuzumab In Breast Cancer Patients w/ Brain Metastases	Breast Cancer|Brain Tumor - Metastatic	Drug: Cabozantinib|Drug: Trastuzumab	Dana-Farber Cancer Institute|Exelixis|Genentech, Inc.		Interventional	https://ClinicalTrials.gov/show/NCT02260531
	Phase 2	TAPUR: Testing the Use of Food and Drug Administration (FDA) Approved Drugs That Target a Specific Abnormality in a Tumor Gene in People With Advanced Stage Cancer	Lymphoma, Non-Hodgkin|Multiple Myeloma|Advanced Solid Tumors	Drug: Erlotinib|Drug: Axitinib|Drug: Bosutinib|Drug: Crizotinib|Drug: Palbociclib|Drug: Sunitinib|Drug: Temsirolimus|Drug: Trastuzumab and Pertuzumab|Drug: Vemurafenib and Cobimetinib|Drug: Vismodegib|Drug: Cetuximab|Drug: Dasatinib|Drug: Regorafenib|Drug: Olaparib|Drug: Pembrolizumab	American Society of Clinical Oncology|AstraZeneca|Bayer|Bristol-Myers Squibb|Eli Lilly and Company|Genentech, Inc.|Merck Sharp & Dohme Corp.|Pfizer		Interventional	https://ClinicalTrials.gov/show/NCT02693535
	Phase 2	Nintedanib Compared With Placebo in Treating Against Radiation-Induced Pneumonitis in Patients With Non-small Cell Lung Cancer That Cannot Be Removed by Surgery and Are Undergoing Chemoradiation Therapy	Radiation-Induced Pneumonitis|Stage IIA Non-Small Cell Lung Carcinoma|Stage IIB Non-Small Cell Lung Carcinoma|Stage IIIA Non-Small Cell Lung Cancer|Stage IIIB Non-Small Cell Lung Cancer|Stage IV Non-Small Cell Lung Cancer	Other: Laboratory Biomarker Analysis|Drug: Nintedanib|Other: Placebo|Procedure: Quality-of-Life Assessment	Roswell Park Cancer Institute|National Cancer Institute (NCI)|National Comprehensive Cancer Network		Interventional	https://ClinicalTrials.gov/show/NCT02452463
	Phase 2	Bevacizumab With Etoposide and Cisplatin in Breast Cancer Patients With Brain and/or Leptomeningeal Metastasis	Breast Neoplasms|Leptomeningeal Metastasis|Brain Metastases	Drug: Bevacizumab, etoposide, cisplatin|Drug: Intrathecal methotrexate	National Taiwan University Hospital|Taipei Veterans General Hospital, Taiwan|Taichung Veterans General Hospital|Chang Gung Memorial Hospital		Interventional	https://ClinicalTrials.gov/show/NCT01281696
	Phase 2	The Use of CT Perfusion to Determine the Normalization Window Period in the Treatment of Advanced Primary Lung Adenocarcinoma With Endostar	Advanced Primary Lung Adenocarcinoma	Drug: endostar	Simcere Pharmaceutical Co., Ltd		Interventional	https://ClinicalTrials.gov/show/NCT01564329
	Phase 2	HYPAZ: Hypertension Induced by Pazopanib	Renal Cell Carcinoma|Soft Tissue Sarcoma|Glioblastoma|Ovarian Cancer|Cervical Cancer|Breast Cancer|Non-small Cell Lung Cancer|Small Cell Lung Cancer|Pancreatic Cancer|Melanoma|Gastrointestinal Cancer	Drug: Pazopanib	Cambridge University Hospitals NHS Foundation Trust|University of Cambridge|GlaxoSmithKline		Interventional	https://ClinicalTrials.gov/show/NCT01392352
	Phase 2	Efficacy and Safety Study of Topical Rapamycin Associated With Pulsed Dye Laser in Patients With Sturge-Weber Syndrome	Sturge- Weber Syndrome	Drug: Drug: Topical Rapamycin	Clinica Universidad de Navarra, Universidad de Navarra		Interventional	https://ClinicalTrials.gov/show/NCT02080624
	Phase 2	A Phase 2 Study of Eribulin Followed by AC as Preoperative Therapy for HER2-negative Inflammatory Breast Cancer	Inflammatory Breast Cancer|Human Epidermal Growth Factor 2 Negative Carcinoma of Breast	Drug: Eribulin|Drug: Adriamycin|Drug: Cyclophosphamide	Dana-Farber Cancer Institute|Eisai Inc.		Interventional	https://ClinicalTrials.gov/show/NCT02623972
	Phase 2	A Study of Sorafenib in Patients With Chemonaive Metastatic Uveal Melanoma	Uveal Melanoma	Drug: Placebo|Drug: Sorafenib|Drug: Sorafenib	Prof. Dr. med. Max. E. Scheulen|ClinAssess GmbH|University Hospital, Essen		Interventional	https://ClinicalTrials.gov/show/NCT01377025
	Phase 2	Cyclophosphamide, Topotecan, and Bevacizumab (CTB) in Patients With Relapsed/Refractory Ewing's Sarcoma and Neuroblastoma	Neuroblastoma|Sarcoma	Drug: Cyclophosphamide, Topotecan, and Bevacizumab	Memorial Sloan Kettering Cancer Center|Genentech, Inc.|Children's Mercy Hospital Kansas City|Penn State University|University of Colorado, Denver|Sidney Kimmel Comprehensive Cancer Center|Phoenix Children's Hospital Center for Cancer & Blood Disorders|Alberta Children's Hospital|MD Anderson Cancer Center Orlando|M.D. Anderson Cancer Center		Interventional	https://ClinicalTrials.gov/show/NCT01492673
	Phase 2	Benazepril Hydrochloride, Lisinopril, Ramipril, or Losartan Potassium in Treating Hypertension in Patients With Solid Tumors	Hypertension|Unspecified Adult Solid Tumor, Protocol Specific	Drug: lisinopril|Drug: losartan potassium|Other: laboratory biomarker analysis|Drug: benazepril hydrochloride|Drug: ramipril	Wake Forest University Health Sciences		Interventional	https://ClinicalTrials.gov/show/NCT01234922
	Phase 2	Detecting the Impact of Statin Therapy On Lowering Risk of Venous Thrombo-Embolic Events (DISOLVE)	Venous Thromboembolism|Deep Vein Thrombosis|Neoplasms	Drug: Rosuvastatin|Drug: Placebo	University of Vermont		Interventional	https://ClinicalTrials.gov/show/NCT01524653
	Phase 2	A Randomized Placebo-controlled Phase 2 Study of Decitabine With or Without Eltrombopag in AML Patients	Acute Myeloid Leukemia	Drug: Eltrombopag|Drug: Placebo	Technische UniversitÃ¤t Dresden|Novartis		Interventional	https://ClinicalTrials.gov/show/NCT02446145
	Phase 2	Olaparib and Cediranib Maleate in Treating Patients With Recurrent Ovarian, Primary Peritoneal, or Fallopian Tube Cancer	Deleterious BRCA1 Gene Mutation|Deleterious BRCA2 Gene Mutation|Fallopian Tube Endometrioid Adenocarcinoma|Fallopian Tube Serous Adenocarcinoma|High Grade Ovarian Serous Adenocarcinoma|Ovarian Endometrioid Tumor|Primary Peritoneal Serous Adenocarcinoma|Recurrent Fallopian Tube Carcinoma|Recurrent Ovarian Carcinoma|Recurrent Primary Peritoneal Carcinoma	Drug: Cediranib Maleate|Other: Laboratory Biomarker Analysis|Drug: Olaparib|Other: Pharmacological Study	National Cancer Institute (NCI)		Interventional	https://ClinicalTrials.gov/show/NCT02345265
	Phase 2	Maintenance Treatment for Ovarian Carcinoma in Remission by an Antiangiogenic Treatment Strategy	Ovarian Carcinoma	Drug: Cytophosphan, Celecoxib, Methotrexate	HaEmek Medical Center, Israel		Interventional	https://ClinicalTrials.gov/show/NCT01175772
	Phase 2	Pazopanib Paediatric Phase II Trial Children's Oncology Group (COG) in Solid Tumors	Solid Tumours	Drug: Pazopanib GW786034	Novartis Pharmaceuticals|Children's Oncology Group|Novartis		Interventional	https://ClinicalTrials.gov/show/NCT01956669
	Phase 2	Pomalidomide or Lenalidomide and Dexamethasone in Treating Patients With Relapsed or Refractory Multiple Myeloma Previously Treated With Lenalidomide	Recurrent Plasma Cell Myeloma|Refractory Plasma Cell Myeloma	Drug: Dexamethasone|Drug: Lenalidomide|Drug: Pomalidomide	Mayo Clinic|National Cancer Institute (NCI)		Interventional	https://ClinicalTrials.gov/show/NCT01794039
	Phase 2	Ixazomib and Dexamethasone Versus Ixazomib, Dexamethasone and Lenalidomide, Randomized With NFKB2 Rearrangement	Recurrent Plasma Cell Myeloma|Refractory Plasma Cell Myeloma	Drug: Dexamethasone|Drug: Ixazomib|Drug: Lenalidomide	Emory University|Millennium Pharmaceuticals, Inc.|Multiple Myeloma Research Consortium		Interventional	https://ClinicalTrials.gov/show/NCT02765854
	Phase 2	A Toll-like Receptor Agonist as an Adjuvant to Tumor Associated Antigens (TAA) Mixed With Montanide ISA-51 VG With Bevacizumab for Patients With Recurrent Glioblastoma	Glioblastoma|Glioma	Drug: Bevacizumab|Biological: Peptide Vaccine|Drug: Poly-ICLC as immune adjuvant|Drug: Keyhole limpet hemocyanin (KLH)	New York University School of Medicine|Mount Sinai Hospital, New York		Interventional	https://ClinicalTrials.gov/show/NCT02754362
	Phase 2	MLN 9708 With Lenalidomide as Maintenance Post Autologous Stem Cell Transplant for Multiple Myeloma Patients	Myeloma	Drug: Lenalidomide|Drug: MLN9708|Radiation: Questionnaires	M.D. Anderson Cancer Center|Millennium Pharmaceuticals, Inc.		Interventional	https://ClinicalTrials.gov/show/NCT01718743
	Phase 2	Atezolizumab and Bevacizumab in Treating Patients With Recurrent, Persistent, or Metastatic Cervical Cancer	Cervical Adenocarcinoma|Cervical Adenosquamous Carcinoma|Cervical Squamous Cell Carcinoma, Not Otherwise Specified|Recurrent Cervical Carcinoma|Stage IV Cervical Cancer|Stage IVA Cervical Cancer|Stage IVB Cervical Cancer	Drug: Atezolizumab|Biological: Bevacizumab|Other: Laboratory Biomarker Analysis	National Cancer Institute (NCI)		Interventional	https://ClinicalTrials.gov/show/NCT02921269
	Phase 2	Phase II Study of Axitinib (AG-013736) With Evaluation of the VEGF-pathway in Metastatic, Recurrent or Primary Unresectable Pheochromocytoma/Paraganglioma	Pheochromocytoma|Paraganglioma	Drug: Axitinib (AG-013736)	National Cancer Institute (NCI)|National Institutes of Health Clinical Center (CC)		Interventional	https://ClinicalTrials.gov/show/NCT01967576
	Phase 2	Study of Preoperative Therapy With Pazopanib (VotrientÂ®) to Treat High-risk Soft Tissue Sarcoma	Sarcoma, Soft-tissue	Drug: pazopanib	Heidelberg University|UniversitÃ¤tsmedizin Mannheim|Klinikum Frankfurt HÃ¶chst|German Cancer Research Center|GlaxoSmithKline|University Hospital Heidelberg		Interventional	https://ClinicalTrials.gov/show/NCT01543802
	Phase 2	Transarterial Chemoembolization Plus Radiotherapy or Sorafenib in Hepatocellular Carcinoma With Major Vascular Invasion	Hepatocellular Carcinoma	Radiation: TACE+EBRT|Drug: Sorafenib	Asan Medical Center		Interventional	https://ClinicalTrials.gov/show/NCT01901692
	Phase 2	Getting Physical on Cigarettes - Smoking Cessation & Relapse Prevention	Cancer	Behavioral: Exercise Behaviour Maintenance|Behavioral: Smoking Relapse prevention booklets|Behavioral: Contact control	University of Western Ontario, Canada|Canadian Cancer Society Research Institute (CCSRI)		Interventional	https://ClinicalTrials.gov/show/NCT01305447
	Phase 2	Study of Pembrolizumab (MK-3475) as Monotherapy in Participants With Previously-Treated Locally Advanced Unresectable or Metastatic Colorectal Cancer (MK-3475-164/KEYNOTE-164)	Colorectal Carcinoma	Biological: Pembrolizumab	Merck Sharp & Dohme Corp.		Interventional	https://ClinicalTrials.gov/show/NCT02460198
	Phase 2	BIBF 1120 for Recurrent High-Grade Gliomas	Glioblastoma|Gliosarcoma|Anaplastic Astrocytoma|Anaplastic Oligodendroglioma|Anaplastic Oligoastrocytoma	Drug: BIBF 1120	Patrick Y. Wen, MD|Boehringer Ingelheim|Wake Forest University Health Sciences|University of Virginia|Massachusetts General Hospital|The Cleveland Clinic|Dana-Farber Cancer Institute		Interventional	https://ClinicalTrials.gov/show/NCT01380782
	Phase 2	Everolimus and Octreotide Acetate With or Without Bevacizumab in Treating Patients With Locally Advanced or Metastatic Pancreatic Neuroendocrine Tumors That Cannot Be Removed by Surgery	Pancreatic Gastrinoma|Pancreatic Neuroendocrine Tumor G1|Pancreatic Neuroendocrine Tumor G2|Pancreatic Vipoma|Recurrent Pancreatic Neuroendocrine Carcinoma	Biological: Bevacizumab|Drug: Everolimus|Drug: Octreotide Acetate	National Cancer Institute (NCI)		Interventional	https://ClinicalTrials.gov/show/NCT01229943
	Phase 2	Atorvastatin in Preventing Nasopharyngeal Carcinoma Patients Receiving Radiotherapy From Carotid Stenosis	Nasopharyngeal Carcinoma|Radiation Therapy Complication	Drug: Atorvastatin|Other: Placebo	Sun Yat-Sen Memorial Hospital of Sun Yat-Sen University		Interventional	https://ClinicalTrials.gov/show/NCT02022293
	Phase 2	Axitinib (AG-013736) in Patients With Progressive, Recurrent/Metastatic Adenoid Cystic Carcinoma	Adenoid Cystic Carcinoma	Drug: AG-013736 (AXITINIB)	Memorial Sloan Kettering Cancer Center|National Comprehensive Cancer Network|Pfizer		Interventional	https://ClinicalTrials.gov/show/NCT01558661
	Phase 2	Imaging Studies and the Development of Multiple Myeloma	Multiple Myeloma|Smoldering Multiple Myeloma|Monoclonal Gammopathy of Undetermined Significance	Drug: Fluciclatide	National Cancer Institute (NCI)|National Institutes of Health Clinical Center (CC)		Interventional	https://ClinicalTrials.gov/show/NCT01571726
	Phase 2	Phase II NKTR-102 In Bevacizumab-Resistant High Grade Glioma	Anaplastic Astrocytomas|Anaplastic Oligodendrogliomas|Glioblastomas (GBM)	Drug: Etirinotecan pegol	Lawrence Recht|Nektar Therapeutics|Stanford University		Interventional	https://ClinicalTrials.gov/show/NCT01663012
	Phase 2	HYPONCO - Hypoxia in Brain Tumors	Anaplastic Glioma	Other: 18F-FMISO PET-scanning	University Hospital, Caen		Interventional	https://ClinicalTrials.gov/show/NCT01200134
	Phase 2	Cabozantinib for Adults With Advanced Soft Tissue Sarcoma	Refractory Soft Tissue Sarcomas	Drug: Cabozantinib	National Cancer Institute (NCI)|National Institutes of Health Clinical Center (CC)		Interventional	https://ClinicalTrials.gov/show/NCT01755195
	Phase 2	Temozolomide and Irinotecan Hydrochloride With or Without Bevacizumab in Treating Young Patients With Recurrent or Refractory Medulloblastoma or CNS Primitive Neuroectodermal Tumors	Recurrent Childhood Medulloblastoma|Recurrent Childhood Pineoblastoma|Recurrent Childhood Supratentorial Embryonal Tumor, Not Otherwise Specified	Biological: Bevacizumab|Drug: Irinotecan Hydrochloride|Drug: Temozolomide	National Cancer Institute (NCI)		Interventional	https://ClinicalTrials.gov/show/NCT01217437
	Phase 2	Multicenter Clinical Trial to Investigate the Efficacy and Safety of Bendamustine, Dexamethasone and Thalidomide in Relapsed or Refractory Multiple Myeloma Patients After Treatment With Lenalidomide and Bortezomib or Which Are Ineligible to One of These Drugs	Multiple Myeloma	Drug: Bendamustine + Dexamethasone + Thalidomide	Azienda Ospedaliera di Bolzano|Mundipharma Pte Ltd.		Interventional	https://ClinicalTrials.gov/show/NCT01526694
	Phase 2	Study of GDC-0980 Versus Everolimus in Participants With Metastatic Renal Cell Carcinoma Who Have Progressed on or Following Vascular Endothelial Growth Factor- (VEGF) Targeted Therapy	Renal Cell Carcinoma	Drug: Everolimus|Drug: GDC-0980	Genentech, Inc.		Interventional	https://ClinicalTrials.gov/show/NCT01442090
	Phase 2	A Study of Zelboraf (Vemurafenib) in Patients With BRAF V600 Mutation-Positive Cancers	Multiple Myeloma, Neoplasms	Drug: cetuximab|Drug: vemurafenib [Zelboraf]|Drug: vemurafenib [Zelboraf]	Hoffmann-La Roche		Interventional	https://ClinicalTrials.gov/show/NCT01524978
	Phase 2	Osimertinib With or Without Bevacizumab in Treating Patients With EGFR Positive Non-small Cell Lung Cancer and Brain Metastases	EGFR Activating Mutation|EGFR NP_005219.2:p.T790M|Metastatic Malignant Neoplasm in the Brain|Non-Small Cell Lung Carcinoma|Recurrent Non-Small Cell Lung Carcinoma	Biological: Bevacizumab|Other: Laboratory Biomarker Analysis|Drug: Osimertinib	National Cancer Institute (NCI)		Interventional	https://ClinicalTrials.gov/show/NCT02971501
	Phase 2	A Study of Bevacizumab (Avastin) in Combination With Dacarbazine in Participants With Unresectable/Metastatic Melanoma	Malignant Melanoma	Drug: Bevacizumab|Drug: Dacarbazine	Hoffmann-La Roche		Interventional	https://ClinicalTrials.gov/show/NCT01164007
	Phase 2	Topical Timolol for Infantile Hemangioma in Early Proliferative Phase	Hemangioma	Drug: Timolol|Drug: Placebo	FundaciÃ³ Institut de Recerca de l'Hospital de la Santa Creu i Sant Pau		Interventional	https://ClinicalTrials.gov/show/NCT02731287
	Phase 2	Sunitinib or Cediranib for Alveolar Soft Part Sarcoma	Sarcoma, Alveolar Soft Part	Drug: Cediranib|Drug: Sunitinib	National Cancer Institute (NCI)|National Institutes of Health Clinical Center (CC)		Interventional	https://ClinicalTrials.gov/show/NCT01391962
	Phase 2	Exploratory Trial to Estimate Proportion of Patients With Tumor Cell Contaminated Leukapheresis Products With and Without Bortezomib With In-vivo Purging - Multiple Myeloma (MM)	Multiple Myeloma	Drug: Bortezomib|Drug: Granulocyte colony-stimulating factor (G-CSF)|Drug: Mozobil	University of Kansas Medical Center		Interventional	https://ClinicalTrials.gov/show/NCT02703779
	Phase 2	Study of Ramucirumab or IMC-18F1 With Docetaxel or Docetaxel Alone as Second-Line Therapy in Participants With Bladder,Urethra, Ureter, or Renal Pelvis Carcinoma	Carcinoma of Urinary Tract|Urethral Carcinoma|Carcinoma of Ureter|Carcinoma of Renal Pelvis	Drug: Docetaxel|Biological: Ramucirumab DP|Biological: IMC-18F1	Eli Lilly and Company		Interventional	https://ClinicalTrials.gov/show/NCT01282463
	Phase 2	Avastin / Irinotecan in Patients With Recurrent or Progressive Malignant Glioma	Recurrent Malignant Glioma	Drug: Bevacizumab / Irinotecan	Medical University Innsbruck|Roche, Austria		Interventional	https://ClinicalTrials.gov/show/NCT01144988
	Phase 2	Ziv-Aflibercept in Treating and Computed Tomography Perfusion Imaging in Predicting Response in Patients With Pancreatic Neuroendocrine Tumors That Are Metastatic or Cannot Be Removed by Surgery	Multiple Endocrine Neoplasia Type 1|Pancreatic Neuroendocrine Carcinoma	Radiation: Computed Tomography Perfusion Imaging|Other: Laboratory Biomarker Analysis|Biological: Ziv-Aflibercept	National Cancer Institute (NCI)		Interventional	https://ClinicalTrials.gov/show/NCT02101918
	Phase 2	A Randomized Phase II Study to Compare the Safety and Efficacy of Dalteparin vs. Rivaroxaban for Cancer-associated Venous Thromboembolism	Cancer-associated Thrombosis|Esophageal Cancer|Gastric Cancer|Hepatobiliary Cancer|Pancreatic Cancer|Duodenal Cancer	Drug: Rivaroxaban|Drug: Dalteparin	Asan Medical Center		Interventional	https://ClinicalTrials.gov/show/NCT03139487
	Phase 2	Nelfinavir as Bortezomib-sensitizing Drug in Patients With Proteasome Inhibitor-nonresponsive Myeloma	Myeloma	Drug: Nelfinavir|Drug: bortezomib|Drug: Dexamethasone	Swiss Group for Clinical Cancer Research		Interventional	https://ClinicalTrials.gov/show/NCT02188537
	Phase 2	Study of Apatinib in Advanced Hepatocellular Carcinoma(HCC)	Hepatocellular Carcinoma	Drug: Apatinib	Tianjin Medical University Cancer Institute and Hospital		Interventional	https://ClinicalTrials.gov/show/NCT03046979
	Phase 2	Bevacizumab With or Without Trebananib in Treating Patients With Recurrent Brain Tumors	Adult Anaplastic Oligodendroglioma|Adult Giant Cell Glioblastoma|Adult Glioblastoma|Adult Gliosarcoma|Adult Oligodendroglioma|Recurrent Adult Brain Neoplasm	Drug: Bevacizumab|Other: Placebo|Drug: AMG 386	National Cancer Institute (NCI)		Interventional	https://ClinicalTrials.gov/show/NCT01609790
	Phase 2	Front-line Therapy With Carfilzomib, Lenalidomide, and Dexamethasone Induction	Multiple Myeloma	Drug: Carfilzomib/Lenalidomide/Dexamethasone	University Hospital, Toulouse|Onyx Therapeutics, Inc.|Celgene		Interventional	https://ClinicalTrials.gov/show/NCT02405364
	Phase 2	Sirolimus/Tacrolimus Combination After HLA Matched Related Peripheral Blood Stem Cell Transplants	Acute Leukemia in Remission|Myelodysplastic Syndromes|Leukemia, Myeloid, Chronic-Phase|Leukemia, Myeloid, Accelerated-Phase	Drug: Sirolimus|Drug: Tacrolimus	The Korean Society of Blood and Marrow Transplantation|Asan Medical Center|Chonbuk National University Hospital|Chonnam National University Hospital|Chung-Ang University Hosptial, Chung-Ang University College of Medicine|Daegu Catholic University Medical Center|Ewha Womans University Mokdong Hospital|Gachon University Gil Medical Center|Inha University Hospital|Inje University|Keimyung University…		Interventional	https://ClinicalTrials.gov/show/NCT01488253
	Phase 2	Daily Oral Regorafenib for Chemotherapy-Refractory, Metastatic and Locally Advanced Angiosarcoma	Adult Angiosarcoma|Recurrent Adult Soft Tissue Sarcoma|Stage III Adult Soft Tissue Sarcoma|Stage IV Adult Soft Tissue Sarcoma	Drug: regorafenib	Northwestern University|Bayer|National Cancer Institute (NCI)		Interventional	https://ClinicalTrials.gov/show/NCT02048722
	Phase 2	Capecitabine and Bevacizumab With or Without Atezolizumab in Treating Patients With Refractory Metastatic Colorectal Cancer	Recurrent Colorectal Carcinoma|Stage IV Colorectal Cancer|Stage IVA Colorectal Cancer|Stage IVB Colorectal Cancer	Drug: Atezolizumab|Biological: Bevacizumab|Drug: Capecitabine|Other: Laboratory Biomarker Analysis|Other: Placebo	Academic and Community Cancer Research United|National Cancer Institute (NCI)		Interventional	https://ClinicalTrials.gov/show/NCT02873195
	Phase 2	Combination Chemotherapy, Gemcitabine Hydrochloride, and Radiation Therapy Before Surgery in Treating Patients With Borderline Resectable Pancreatic Cancer	Pancreatic Adenocarcinoma|Stage IIA Pancreatic Cancer|Stage IIB Pancreatic Cancer|Stage III Pancreatic Cancer	Drug: Fluorouracil|Drug: Gemcitabine Hydrochloride|Radiation: Intensity-Modulated Radiation Therapy|Drug: Irinotecan Hydrochloride|Drug: Leucovorin Calcium|Drug: Oxaliplatin	Albert Einstein College of Medicine, Inc.|National Cancer Institute (NCI)		Interventional	https://ClinicalTrials.gov/show/NCT01897454
	Phase 2	Study of G-202 (Mipsagargin) as Second-Line Therapy Following Sorafenib in Hepatocellular Carcinoma	Advanced Adult Hepatocellular Carcinoma	Drug: G-202	GenSpera, Inc.		Interventional	https://ClinicalTrials.gov/show/NCT01777594
	Phase 2	An Exploratory Safety Study to Investigate the Extent of Tumor Cell Mobilization (TCM) After Use of G-CSF Alone or G-CSF Plus Plerixafor in Multiple Myeloma (MM) Patients Who May be Poor Mobilizers of Stem Cells	Multiple Myeloma	Drug: Plerixafor|Drug: Granulocyte-colony stimulating factor (G-CSF)	Sanofi|Genzyme, a Sanofi Company		Interventional	https://ClinicalTrials.gov/show/NCT01753453
	Phase 2	Bevacizumab Versus Cidofovir for the Treatment of Recurrent Respiratory Papillomatosis	Recurrent Respiratory Papillomatosis	Drug: Bevacizumab|Drug: Cidofovir|Other: Placebo	Centro de InvestigaciÃ³n en. Enfermedades Infecciosas, Mexico		Interventional	https://ClinicalTrials.gov/show/NCT02555800
	Phase 2	Trial of Selumetinib in Patients With Neurofibromatosis Type II Related Tumors	Neurofibromatosis 2|Vestibular Schwannoma|Meningioma|Ependymoma|Glioma	Drug: Selumetinib	Children's Hospital Medical Center, Cincinnati|AstraZeneca		Interventional	https://ClinicalTrials.gov/show/NCT03095248
	Phase 2	Study on the Anti-tumor Activity, Safety and Pharmacology of IPH2101 in Patients With Smoldering Multiple Myeloma	Smoldering Multiple Myeloma	Drug: IPH2101	Innate Pharma		Interventional	https://ClinicalTrials.gov/show/NCT01222286
	Phase 2	Irinotecan and Cetuximab With or Without Bevacizumab in Treating Patients With RAS Wild-Type Locally Advanced or Metastatic Colorectal Cancer That Cannot Be Removed by Surgery	Colorectal Adenocarcinoma|KRAS wt Allele|NRAS wt Allele|Stage IV Colorectal Cancer|Stage IVA Colorectal Cancer|Stage IVB Colorectal Cancer	Biological: Bevacizumab|Biological: Cetuximab|Drug: Irinotecan|Other: Laboratory Biomarker Analysis|Other: Placebo	Academic and Community Cancer Research United|National Cancer Institute (NCI)		Interventional	https://ClinicalTrials.gov/show/NCT02292758
	Phase 2	Corticosteroids With Placebo Versus Corticosteroids With Propranolol Treatment of Infantile Hemangiomas (IH)	Hemangioma	Drug: Prednisolone (Corticosteroid)|Drug: Propranolol|Drug: Placebo	Seattle Children's Hospital		Interventional	https://ClinicalTrials.gov/show/NCT01074437
	Phase 2	Clinical Study of Anti-tumor Necrosis Factor Therapy in Patients With Takayasu Arteritis	Takayasu's Arteritis	Drug: remicade (anti tumor necrosis factor inhibitor)	Seoul National University Hospital		Interventional	https://ClinicalTrials.gov/show/NCT02457585
	Phase 2	UARK 2014-08 A Phase II Open-Label, Multiple-Dose, Single Agent Study to Evaluate the Overall Response Rate of Orally Administered Trametinib	Multiple Myeloma	Drug: Trametinib	University of Arkansas		Interventional	https://ClinicalTrials.gov/show/NCT02140840
	Phase 2	Study of Single Agent Lenalidomide in Older Adults With Newly Diagnosed Multiple Myeloma	Multiple Myeloma	Drug: Lenalidomide|Drug: Prednisone|Drug: Dexamethasone	H. Lee Moffitt Cancer Center and Research Institute|Celgene		Interventional	https://ClinicalTrials.gov/show/NCT01054144
	Phase 2	PEGPH20, Gemicitabine and Nab-Paclitaxel for Pancreatic Ductal Adenocarcinoma	Adenocarcinoma	Drug: PEGPH20|Drug: Gemcitabine|Drug: Nab-paclitaxel	Andrew Ko|University of California, San Francisco		Interventional	https://ClinicalTrials.gov/show/NCT02487277
	Phase 2	Testing Lenvatinib in Patients With Adenoid Cystic Carcinoma	Adenoid Cystic Carcinoma	Drug: Lenvatinib	Memorial Sloan Kettering Cancer Center|Eisai Inc.		Interventional	https://ClinicalTrials.gov/show/NCT02780310
	Phase 2	Study of High Dose Intravenous (IV) Ascorbic Acid in Measurable Solid Tumor Disease	Sarcoma|Adenocarcinoma|Carcinoma|Multiple Myeloma|Desmoplastic Small Round Cell Tumor	Drug: Ascorbic acid (vitamin C)	Situs Cancer Research Center		Interventional	https://ClinicalTrials.gov/show/NCT01125449
	Phase 2	Nonmyeloablative Allogeneic Stem Cell Transplant Followed by Bortezomib in High-risk Multiple Myeloma Patients	Multiple Myeloma|High-Risk Cancer	Drug: Bortezomib following nonmyeloablative allogeneic transplant	Maisonneuve-Rosemont Hospital		Interventional	https://ClinicalTrials.gov/show/NCT02308280
	Phase 2	Bevacizumab in Pats w/ Recurrent ST Brain Metas Who Have Failed Whole Brain Radiation Therapy	Metastatic Cancer|Unspecified Adult Solid Tumor, Protocol Specific	Biological: bevacizumab|Procedure: quality-of-life assessment	Northwestern University|Genentech, Inc.		Interventional	https://ClinicalTrials.gov/show/NCT01898130
	Phase 2	Study in Infants With Infantile Hemangioma to Compare Propranolol Gel to Placebo	Infantile Hemangioma	Drug: propranolol gel|Drug: Placebo	Pierre Fabre Dermatology		Interventional	https://ClinicalTrials.gov/show/NCT01512173
	Phase 2	An Efficacy and Safety Study of Daratumumab in Patients With Multiple Myeloma Who Have Received at Least 3 Prior Lines of Therapy (Including a Proteasome Inhibitor [PI] and Immunomodulatory Drug [IMiD]) or Are Double Refractory to a PI and an IMiD	Multiple Myeloma	Drug: Daratumumab 16 mg/kg (Part 1)|Drug: Daratumumab 8 mg/kg (Part 1)|Drug: Methylprednisolone|Drug: Acetaminophen|Drug: Diphenhydramine|Drug: Daratumumab (Part 2)	Janssen Research & Development, LLC		Interventional	https://ClinicalTrials.gov/show/NCT01985126
	Phase 2	Regorafenib in Patients With Progressive, Recurrent/Metastatic Adenoid Cystic Carcinoma	Adenoid Cystic Carcinoma	Drug: Regorafenib	Memorial Sloan Kettering Cancer Center|Bayer		Interventional	https://ClinicalTrials.gov/show/NCT02098538
	Phase 2	Phase II Pediatric Study With Dabrafenib in HGG Patients	Anaplastic Astrocytoma|Glioblastoma|Giant Cell Glioblastoma|Gliosarcoma|Anaplastic Oligodendroglioma|Anaplastic Oligoastrocytoma|Anaplastic Ependymoma|Choroid Plexus Carcinoma|Anaplastic Ganglioglioma|Pineal Parenchymal Tumor|Pineoblastoma|Medulloblastoma|PNET|Rhabdoid Tumor|Perineurioma|MPNST|Malignant Meningloma|Anaplastic Hemangiopericytoma	Drug: dabrafenib	Novartis Pharmaceuticals|Novartis		Interventional	https://ClinicalTrials.gov/show/NCT02684058
	Phase 2	IFM2009-02-Pomalidomide and Dexamethasone Phase 2 Myeloma	Multiple Myeloma	Drug: Pomalidomide|Drug: Pomalidomide	University Hospital, Lille|Celgene Corporation		Interventional	https://ClinicalTrials.gov/show/NCT01053949
	Phase 2	A Study of GSK2110183 in Subjects With Proteasome Inhibitor Refractory Multiple Myeloma	Cancer	Drug: Part 1; Cohort 1|Drug: Part 1; Cohort 2|Drug: Part 2; Stage 1|Drug: Part 2, Stage 2	GlaxoSmithKline		Interventional	https://ClinicalTrials.gov/show/NCT01445587
	Phase 2	Evaluation of 68Gallium-DOTATATE PET/CT for Detecting Neuroendocrine Tumors	Neuroendocrine Tumors|Von Hippel-Lindau Syndrome|Hippel-Lindau Disease	Drug: 68Gallium DOTATATE|Procedure: Radio-guided surgery	National Cancer Institute (NCI)|National Institutes of Health Clinical Center (CC)		Interventional	https://ClinicalTrials.gov/show/NCT01967537
	Phase 2	A Phase 2, Open-Label, Multicenter Study of Ixazomib Plus Lenalidomide and Dexamethasone in Adult Japanese Patients With Relapsed and/or Refractory Multiple Myeloma	Relapsed and/or Refractory Multiple Myeloma	Drug: Ixazomib 4.0 mg, lenalidomide 25 mg, dexamethasone 40 mg	Takeda		Interventional	https://ClinicalTrials.gov/show/NCT02917941
	Phase 2	A Study of PAD Followed by Autologous Stem Cell Transplantation (ASCT) to Treat Newly Diagnosed Multiple Myeloma	Multiple Myeloma.	Drug: PAD Followed by ASCT	Shanghai Changzheng Hospital		Interventional	https://ClinicalTrials.gov/show/NCT01852799
	Phase 2	A Study of Rindopepimut/GM-CSF in Patients With Relapsed EGFRvIII-Positive Glioblastoma	Glioblastoma|Small Cell Glioblastoma|Giant Cell Glioblastoma|Gliosarcoma|Glioblastoma With Oligodendroglial Component|Recurrent Glioblastoma|Relapsed Glioblastoma	Drug: Bevacizumab|Drug: Rindopepimut (CDX-110) with GM-CSF|Drug: KLH	Celldex Therapeutics		Interventional	https://ClinicalTrials.gov/show/NCT01498328
	Phase 2	Comparative Study of the Use of Beta Blocker and Oral Corticosteroid in the Treatment of Infantile Hemangioma	Hemangioma	Drug: Propranolol|Drug: Prednisone	University of Sao Paulo|University of Sao Paulo General Hospital		Interventional	https://ClinicalTrials.gov/show/NCT01072045
	Phase 2	Efficacy and Safety of VascanaÂ® in Subjects With Secondary Raynaud's Phenomenon	Raynaud's Phenomenon Secondary to Connective Tissue Disease	Drug: Vascana (0.9% nitroglycerin cream)|Drug: Vehicle (placebo)	Covis Pharma S.Ã .r.l.		Interventional	https://ClinicalTrials.gov/show/NCT02688270
	Phase 2	Phase II Study of Alternating Sunitinib and Temsirolimus	Metastatic Renal Cell Carcinoma	Drug: Sunitinib|Drug: Temsirolimus	Dartmouth-Hitchcock Medical Center		Interventional	https://ClinicalTrials.gov/show/NCT01517243
	Phase 2	First Line Treatment Trial in Multiple Myeloma, Finnish Myeloma Group- Multiple Myeloma 02	Multiple Myeloma	Drug: Cyclophosphamide|Drug: Filgrastim	Kuopio University Hospital|Helsinki University Central Hospital|Tampere University Hospital|Turku University Hospital|Oulu University Hospital|Mikkeli Central Hospital|Kymenlaakso Central Hospital Kotka Finland|JyvÃ¤skylÃ¤ Central Hospital|Central Hospital of Kanta-Hame|Satakunta Central Hospital|Kainuu and LÃ¤nsi-Pohja Central Hospital|Celgene Corporation		Interventional	https://ClinicalTrials.gov/show/NCT01790737
	Phase 2	BrUOG 299 :Ixazomib, Oral Metronomic Cyclophosphamide and Dexamethasone for First-Line Treatment of Multiple Myeloma: A Phase II Brown University Oncology Group Study.	Multiple Myeloma	Drug: Ixazomib|Drug: Cyclophosphamide|Drug: Dexamethasone	Ryan Stevenson|Rhode Island Hospital|The Miriam Hospital|Memorial Hospital of Rhode Island|Brown University		Interventional	https://ClinicalTrials.gov/show/NCT02412228
	Phase 2	Prospective Evaluation of the Efficacy of Sirolimus (RapamuneÂ®) in the Treatment of Severe Arteriovenous Malformations	Arteriovenous Malformations	Drug: Sirolimus	Centre Hospitalier Universitaire, Amiens		Interventional	https://ClinicalTrials.gov/show/NCT02042326
	Phase 2	Sildenafil for the Treatment of Lymphatic Malformations	Lymphatic Malformations|Lymphatic Diseases	Drug: Sildenafil 20 mg tablets|Other: Placebo tablets (resembling Revatio)	Stanford University|Ann & Robert H Lurie Children's Hospital of Chicago		Interventional	https://ClinicalTrials.gov/show/NCT02335242
	Phase 2	Dosimetry Guided PRRT With 90Y-DOTATOC	Neuroendrocrine Tumors|Meningioma|Neuroblastoma|Medulloblastoma	Radiation: 90Y-DOTA-3-tyr-Octreotide|Procedure: Positron Emission Tomography (PET) whole body scan|Drug: Amino Acids	O'Dorisio, M S|National Institutes of Health (NIH)|National Cancer Institute (NCI)|University of Iowa		Interventional	https://ClinicalTrials.gov/show/NCT03013387
	Phase 2	Sporadic Angiomyolipomas (AMLs) Growth Kinetics While on Everolimus	Sporadic Angiomyolipomas (AMLs)	Drug: Everolimus	Fox Chase Cancer Center|Novartis Pharmaceuticals		Interventional	https://ClinicalTrials.gov/show/NCT02539459
	Phase 2	Safety and Efficacy of Activated Recombinant Human Factor VII in Cirrhotic Patients Undergoing Partial Hepatectomy	Acquired Bleeding Disorder|Cirrhosis	Drug: activated recombinant human factor VII|Drug: activated recombinant human factor VII|Drug: placebo	Novo Nordisk A/S		Interventional	https://ClinicalTrials.gov/show/NCT01562821
	Phase 2	Doxorubicin-eluting LC Bead M1 for Patients With Hepatocellular Carcinoma	Hepatocellular Carcinoma	Device: DEBDOX	Yale University		Interventional	https://ClinicalTrials.gov/show/NCT02007954
	Phase 2	Ponatinib in Patients With Resistant Chronic Phase Chronic Myeloid Leukemia (CML) to Characterize the Efficacy and Safety of a Range of Doses	Myeloid Leukemia, Chronic, Chronic Phase	Drug: ponatinib 45 mg|Drug: ponatinib 30 mg|Drug: ponatinib 15 mg	Ariad Pharmaceuticals		Interventional	https://ClinicalTrials.gov/show/NCT02467270
	Phase 2	Thiotepa-based Conditioning for Allogeneic Stem-cell Transplantation (SCT) in Lymphoid Malignancies	Non Hodgkin Lymphoma|Hodgkin Lymphoma|Chronic Lymphocytic Leukemia|Multiple Myeloma	Drug: Thiotepa	Sheba Medical Center		Interventional	https://ClinicalTrials.gov/show/NCT02507479
	Phase 2	SARC024: A Blanket Protocol to Study Oral Regorafenib in Patients With Refractory Liposarcoma, Osteogenic Sarcoma, and Ewing Sarcomas	Liposarcoma|Osteogenic Sarcoma|Ewing/Ewing-like Sarcoma	Drug: Regorafenib|Drug: Placebo	Sarcoma Alliance for Research through Collaboration		Interventional	https://ClinicalTrials.gov/show/NCT02048371
	Phase 2	Lenalidomide in HTLV-1 Adult T-Cell Leukemia	Adult T Cell Leukemia/Lymphoma	Drug: Lenalidomide	Columbia University|Celgene Corporation		Interventional	https://ClinicalTrials.gov/show/NCT01274533
	Phase 2	Selinexor, Carfilzomib, and Dexamethasone Versus Placebo, Carfilzomib, and Dexamethasone in Multiple Myeloma	Multiple Myeloma	Drug: Selinexor|Drug: Placebo (for selinexor)|Drug: carfilzomib|Drug: Dexamethasone	Karyopharm Therapeutics Inc		Interventional	https://ClinicalTrials.gov/show/NCT02628704
	Phase 2	Bone Effect of Bortezomib in Patients With Relapsed/Refractory Multiple Myeloma	Multiple Myeloma	Drug: Bortezomib (Velcade)	University of Arkansas|Millennium Pharmaceuticals, Inc.		Interventional	https://ClinicalTrials.gov/show/NCT01062230
	Phase 2	Mitoxantrone, Etoposide, and Cytarabine (MEC) Plus Lenalidomide for Relapsed or Refractory Acute Myeloid Leukemia	AML	Drug: Etoposide|Drug: Cytarabine|Drug: Lenalidomide|Drug: Mitoxantrone	Massachusetts General Hospital|Celgene		Interventional	https://ClinicalTrials.gov/show/NCT03118466
	Phase 2	Avatar-Directed Chemotherapy in Treating Patients With Ovarian, Primary Peritoneal, or Fallopian Tube Cancer	Recurrent Fallopian Tube Carcinoma|Recurrent Ovarian Carcinoma|Recurrent Primary Peritoneal Carcinoma	Biological: Bevacizumab|Drug: Gemcitabine Hydrochloride|Drug: Paclitaxel|Drug: Pegylated Liposomal Doxorubicin Hydrochloride|Drug: Topotecan Hydrochloride	Mayo Clinic|National Cancer Institute (NCI)		Interventional	https://ClinicalTrials.gov/show/NCT02312245
	Phase 2	Safety/Efficacy Study of LDE225 (Sonidegib) Plus Bortezomib in Patients With Relapsed or Relapsed/Refractory Multiple Myeloma	Multiple Myeloma	Drug: LDE225|Drug: Bortezomib	SCRI Development Innovations, LLC|Novartis		Interventional	https://ClinicalTrials.gov/show/NCT02254551
	Phase 2	Selinexor Treatment of Refractory Myeloma	Multiple Myeloma	Drug: Selinexor|Drug: Dexamethasone	Karyopharm Therapeutics Inc		Interventional	https://ClinicalTrials.gov/show/NCT02336815
	Phase 2	Oral Thalidomide and Tegafur-uracil to Decrease Hepatocellular Carcinoma Recurrence	Adult Hepatocellular Carcinoma|Recurrent Hepatocellular Carcinoma|Adverse Reaction to Drug|Vascular Endothelial Growth Factor Overexpression	Drug: thalidomine|Drug: tegafur-uracil	Chang Gung Memorial Hospital		Interventional	https://ClinicalTrials.gov/show/NCT02447679
	Phase 2	Randomized Phase II Trial of Chemoembolization and Sorafenib	Hepatocellular Carcinoma	Drug: conventional TACE in combination with sorafenib, administered on a continuous schedule|Drug: conventional TACE in combination with sorafenib, administered on a sequential schedule	Yale University		Interventional	https://ClinicalTrials.gov/show/NCT02908165
	Phase 2	Panobinostat/Bortezomib/Dexamethasone in Relapsed or Relapsed-and-refractory Multiple Myeloma	Multiple Myeloma	Drug: panobinostat capsules|Drug: bortezomib injection|Drug: dexamethasone tablets	Novartis Pharmaceuticals|Novartis		Interventional	https://ClinicalTrials.gov/show/NCT02654990
	Phase 2	Study of Dalantercept in Patients With Squamous Cell Carcinoma of the Head and Neck	Squamous Cell Carcinoma of the Head and Neck	Biological: Dalantercept	Acceleron Pharma, Inc.		Interventional	https://ClinicalTrials.gov/show/NCT01458392
	Phase 2	A Phase II Study With Tumor Molecular Pharmacodynamic (MPD) Evaluation of Oral mTOR-inhibitor Everolimus (RAD001) 10 mg Daily in Patients Suffering From Classic or Endemic Kaposi's Sarcoma	Kaposi Sarcoma	Drug: everolimus	Institut National de la SantÃ© Et de la Recherche MÃ©dicale, France		Interventional	https://ClinicalTrials.gov/show/NCT01412515
	Phase 2	Ph II Cilengitide Plus Bevacizumab for Recurrent Glioblastoma (GBM)	Glioblastoma	Drug: Cilengitide|Drug: Bevacizumab|Behavioral: Questionnaire	M.D. Anderson Cancer Center|Brain Tumor Trials Collaborative|EMD Serono		Interventional	https://ClinicalTrials.gov/show/NCT01782976
	Phase 2	Study of CLR 131 in Relapsed or Refractory Select B-Cell Malignancies	Multiple Myeloma|Chronic Lymphocytic Leukemia|Small Lymphocytic Lymphoma|Lymphoplasmacytic Lymphoma|Marginal Zone Lymphoma|Mantle-Cell Lymphoma|Diffuse Large B Cell Lymphoma	Drug: CLR 131	Cellectar Biosciences, Inc.		Interventional	https://ClinicalTrials.gov/show/NCT02952508
	Phase 2	Subcutaneous (SC) Bortezomib-Regimens for Patients With RR MM Failing Prior IV Bortezomib-Containing Regimens	Multiple Myeloma	Drug: Subcutaneous bortezomib	Oncotherapeutics|Millennium Pharmaceuticals, Inc.		Interventional	https://ClinicalTrials.gov/show/NCT01695330
	Phase 2	Study of Ibrutinib in Patients With Symptomatic, Previously Untreated Waldenstrom's Macroglobulinemia, and Impact on Tumor Genomic Evolution Using Whole Genome Sequencing	Waldenstrom's Macroglobulinemia	Drug: Ibrutinib	Dana-Farber Cancer Institute|Pharmacyclics LLC.		Interventional	https://ClinicalTrials.gov/show/NCT02604511
	Phase 2	Continuous Versus Intermittent Dosing Regimens for Pomalidomide in Relapsed/Refractory Multiple Myeloma	Multiple Myeloma	Drug: Pomalidomide	Yale University|Celgene Corporation		Interventional	https://ClinicalTrials.gov/show/NCT01319422
	Phase 2	Study of Efficacy and Safety INC280 in Patients With Advanced Hepatocellular Carcinoma	Advanced Hepatocellular Carcinoma	Drug: INC280|Drug: Placebo	Novartis Pharmaceuticals|Novartis		Interventional	https://ClinicalTrials.gov/show/NCT01964235
	Phase 2	Phase II Study of Lenalidomide/Dexamethasone With or Without Elotuzumab for Newly Diagnosed MM Patients in Japan	Multiple Myeloma	Drug: Lenalidomide|Drug: Dexamethasone|Biological: Elotuzumab (BMS-901608)	Bristol-Myers Squibb|AbbVie		Interventional	https://ClinicalTrials.gov/show/NCT02272803
	Phase 2	Phase II Study of Efficacy and Safety of Lenalidomide, Subcutaneous Bortezomib and Dexamethasone Therapy for Newly Diagnosed Multiple Myeloma	Multiple Myeloma	Drug: Bortezomib|Drug: Lenalidomide|Drug: Dexamethasone	Dana-Farber Cancer Institute|Millennium Pharmaceuticals, Inc.|Celgene		Interventional	https://ClinicalTrials.gov/show/NCT02441686
	Phase 2	An Investigational Immuno-therapy Trial of Pomalidomide and Low-dose Dexamethasone With or Without Elotuzumab to Treat Refractory and Relapsed and Refractory Multiple Myeloma (ELOQUENT-3)	Multiple Myeloma	Drug: Elotuzumab|Drug: Pomalidomide|Drug: Dexamethasone	Bristol-Myers Squibb|Celgene|AbbVie		Interventional	https://ClinicalTrials.gov/show/NCT02654132
	Phase 2	Sorafenib VS TACE in HCC Patients With Portal Vein Invasion	Hepatocellular Carcinoma	Drug: Sorafenib|Procedure: TACE for HCC with portal vein invasion	Seoul National University Hospital		Interventional	https://ClinicalTrials.gov/show/NCT01480817
	Phase 2	Bevacizumab, Irinotecan and Temozolomide for Relapsed or Refractory Neuroblastoma	Neuroblastoma	Drug: Bevacizumab, Irinotecan and Temozolomide	Memorial Sloan Kettering Cancer Center|Genentech, Inc.		Interventional	https://ClinicalTrials.gov/show/NCT01114555
	Phase 2	Cabozantinib-s-malate in Treating Patients With Relapsed Osteosarcoma or Ewing Sarcoma	Metastatic Ewing Sarcoma|Metastatic Osteosarcoma|Recurrent Ewing Sarcoma|Recurrent Osteosarcoma|Stage III Osteosarcoma|Stage IV Osteosarcoma|Stage IVA Osteosarcoma|Stage IVB Osteosarcoma|Unresectable Ewing Sarcoma|Unresectable Osteosarcoma	Drug: Cabozantinib S-malate|Other: Laboratory Biomarker Analysis	National Cancer Institute (NCI)		Interventional	https://ClinicalTrials.gov/show/NCT02243605
	Phase 2	Plerixafor Plus Granulocyte Colony-stimulating Factor (G-CSF) For Mobilization And Collection Of Peripheral Hematopoietic Stem Cells In Japanese Participants With Multiple Myeloma	Multiple Myeloma	Drug: plerixafor GZ316455|Drug: Filgrastim	Genzyme, a Sanofi Company|Sanofi		Interventional	https://ClinicalTrials.gov/show/NCT02221479
	Phase 2	Study of Pomalidomide, Cyclophosphamide, Dexamethasone in Relapsed/Refractory Multiple Myeloma	Multiple Myeloma in Relapse|Multiple Myeloma, Refractory	Drug: Pomalidomide|Drug: Cyclophosphamide|Drug: Dexamethasone	Ajai Chari|Celgene Corporation|Icahn School of Medicine at Mount Sinai		Interventional	https://ClinicalTrials.gov/show/NCT02176213
	Phase 2	Zevalin for Patients With Incomplete Response to Chemo Prior to Autologous Stem Cell Transplant for Multiple Myeloma	Multiple Myeloma	Drug: indium-111-ibritumomab tiuxetan|Drug: 90Y Zevalin	Tufts Medical Center|Spectrum Pharmaceuticals, Inc		Interventional	https://ClinicalTrials.gov/show/NCT01207765
	Phase 2	Effects of Anticoagulant Preventive Injection in Patients With Blood Cancer	Lymphoma|Multiple Myeloma	Drug: Tinzaparin|Other: Blood sample	Centre Hospitalier Universitaire de Saint Etienne|LEO Pharma		Interventional	https://ClinicalTrials.gov/show/NCT02260414
	Phase 2	Nonmyeloablative Haploidentical Transplant Followed by MLN9708	Acute Leukemia|Chronic Leukemia|Myelodysplastic Syndrome|Lymphomas|Multiple Myeloma	Drug: MLN9708	Northside Hospital, Inc.|Millennium Pharmaceuticals, Inc.		Interventional	https://ClinicalTrials.gov/show/NCT02169791
	Phase 2	Autologous Stem Cell Transplantation and Maintenance Therapy for Multiple Myeloma	Multiple Myeloma	Drug: Melphalan|Drug: Lenalidomide	University of Virginia		Interventional	https://ClinicalTrials.gov/show/NCT01617213
	Phase 2	Paclitaxel + Bevacizumab (AvastinÂ®) for the Treatment of Metastatic or Unresectable Angiosarcoma	Angiosarcomas|Soft Tissue Sarcoma	Drug: Paclitaxel in combination with Bevacizumab	Stanford University|Genentech, Inc.		Interventional	https://ClinicalTrials.gov/show/NCT01055028
	Phase 2	pazopanib_NCRCC,Ph2 STUDY	Locally Advanced or Metastatic Non-clear Cell Type Renal Cell Carcinoma	Drug: pazopanib	Samsung Medical Center		Interventional	https://ClinicalTrials.gov/show/NCT01538238
	Phase 2	UARK 2012-02 Trial For High-Risk Myeloma Evaluating Accelerating and Sustaining Complete Remission	Multiple Myeloma	Drug: MEL-CFZ-TD-PACE	University of Arkansas|Amgen		Interventional	https://ClinicalTrials.gov/show/NCT02128230
	Phase 2	Trial of Isatuximab (SAR650984) in Patients With High Risk Smoldering Multiple Myeloma	Myeloma	Drug: Isatuximab|Behavioral: Phone Calls|Drug: Diphenhydramine|Drug: Ranitidine|Drug: Methylprednisolone	M.D. Anderson Cancer Center|Sanofi		Interventional	https://ClinicalTrials.gov/show/NCT02960555
	Phase 2	Safety And Efficacy Of Lenalidomide As Maintenance Therapy In Patients With Newly Diagnosed Multiple Myeloma Following A Tandem Autologous-Allogeneic Transplant	Multiple Myeloma	Drug: Lenalidomide	Fondazione Neoplasie Sangue Onlus		Interventional	https://ClinicalTrials.gov/show/NCT01264315
	Phase 2	Phase II Study of Subcutaneous (SC) Bortezomib, Lenalidomide and Dexamethasone for Relapsed and/or Refractory Multiple Myeloma; Followed by SC Bortezomib Maintenance	Multiple Myeloma	Drug: Bortezomib|Drug: Lenalidomide|Drug: Dexamethasone	National Cancer Institute (NCI)|Millennium Pharmaceuticals, Inc.|National Institutes of Health Clinical Center (CC)		Interventional	https://ClinicalTrials.gov/show/NCT01647165
	Phase 2	Study on the Effect of Ibrutinib on High Risk Smoldering Multiple Myeloma Patients	High Risk Smoldering Multiple Myeloma	Drug: Ibrutinib	Icahn School of Medicine at Mount Sinai|Pharmacyclics LLC.		Interventional	https://ClinicalTrials.gov/show/NCT02943473
	Phase 2	NOX-A12 in Combination With Bortezomib and Dexamethasone in Relapsed Multiple Myeloma	Multiple Myeloma	Drug: NOX-A12	NOXXON Pharma AG		Interventional	https://ClinicalTrials.gov/show/NCT01521533
	Phase 2	Carfilzomib + Elotuzumab + Dexamethasone for Relapsed Multiple Myeloma After 1-3 Prior Treatment Lines	Multiple Myeloma in Relapse	Drug: Carfilzomib for Inj 60 milligram (MG)|Drug: Elotuzumab 400 MG|Drug: Dexamethasone	Raija Silvennoinen|Amgen|Bristol-Myers Squibb|Hospital District of Helsinki and Uusimaa|Helsinki University Central Hospital		Interventional	https://ClinicalTrials.gov/show/NCT03155100
	Phase 2	Tolerability and Efficacy of Modified VCD Regimens in Previously Untreated Multiple Myeloma.	Multiple Myeloma	Drug: Bortezomib|Drug: cyclophosphamide|Drug: Dexamethasone	Yongping Zhai|Jinling Hospital, China		Interventional	https://ClinicalTrials.gov/show/NCT02086942
	Phase 2	Timolol Option for Ulcerated Hemangiomas (TOUCH Trial)	Infantile Hemangiomas	Drug: Timolol 0.5% Gel Forming Solution (GFS)|Drug: Mupirocin 2% Ointment	Children's Hospital of Philadelphia|Society for Pediatric Dermatology		Interventional	https://ClinicalTrials.gov/show/NCT01408056
	Phase 2	TRC105 for Recurrent Glioblastoma	Glioblastoma Multiforme	Drug: TRC105	National Cancer Institute (NCI)|National Institutes of Health Clinical Center (CC)		Interventional	https://ClinicalTrials.gov/show/NCT01778530
	Phase 2	Temozolomide Plus Bevacizumab in Patients With Metastatic Melanoma Involving the Central Nervous System	Melanoma	Drug: Temozolomide|Drug: Bevacizumab	Mt. Sinai Medical Center, Miami|Northern California Melanoma Center		Interventional	https://ClinicalTrials.gov/show/NCT01048554
	Phase 2	OptuneÂ® Plus Bevacizumab in Bevacizumab-Refractory Recurrent Glioblastoma	Glioblastoma|Glioma|Gliosarcoma	Drug: Bevacizumab|Device: TTFields	RTOG Foundation, Inc.|NovoCure Ltd.		Interventional	https://ClinicalTrials.gov/show/NCT02743078
	Phase 2	Propylene Glycol-Free Melphalan HCl (EVOMELAÂ®) in Combination With Fludarabine and Total Body Irradiation Based Reduced Intensity Conditioning for Haploidentical Transplantation	Hematological Malignancy Undergoing a Related Donor Haploidentical HCT|Leukemia|Multiple Myeloma|Lymphoma	Drug: Evomela|Drug: Fludarabine|Radiation: Total Body Irradiation	Medical College of Wisconsin		Interventional	https://ClinicalTrials.gov/show/NCT03159702
	Phase 2	Pomalidomide in Combination With Low-dose Dexamethasone or Pomalidomide in Combination With Low-dose Dexamethasone and Daratumumab in Subjects With Relapsed or Refractory Multiple Myeloma Following Lenalidomide-based Therapy in the First or Second Line Setting	Multiple Myeloma	Drug: Pomalidomide|Drug: Dexamethasone|Drug: Daratumumab	Celgene Corporation		Interventional	https://ClinicalTrials.gov/show/NCT01946477
	Phase 2	Phase II Study to Evaluate Fenofibrate Therapy in Patients With Smoldering or Symptomatic Multiple Myeloma	Multiple Myeloma	Drug: Fenofibrate	University of Miami		Interventional	https://ClinicalTrials.gov/show/NCT01965834
	Phase 2	Early Response-adapted Intensification of Induction Chemotherapy in Patients With Newly Diagnosed Multiple Myeloma (MM)	Multiple Myeloma	Drug: Thalidomide, cyclophosphamide, dexamethasone, bortezomib	Chonnam National University Hospital		Interventional	https://ClinicalTrials.gov/show/NCT01114048
	Phase 2	Study of Daratumumab in Combination With Dexamethasone in Resistant or Refractory Multiple Myeloma	Multiple Myeloma	Drug: Daratumumab|Drug: Dexamethasone	University Hospital, Lille|Janssen, LP|Intergroupe Francophone du Myelome		Interventional	https://ClinicalTrials.gov/show/NCT02626481
	Phase 2	Velcade + Cyclophosphamide in Newly Diagnosed Multiple Myeloma	Multiple Myeloma	Drug: Velcade|Drug: Cyclophosphamide|Drug: Revlimid	Duke University|Millennium Pharmaceuticals, Inc.|Duke Cancer Institute		Interventional	https://ClinicalTrials.gov/show/NCT01729338
	Phase 2	Providing Access to Cord Blood Units for Transplants	Chronic Myelogous Leukemia/Other Leukemia|Acute Leukemias|MDS/MPS|Multiple Myeloma|Non-Hodgkin Lymphoma	Drug: Access to unlicensed cord blood units	National Cancer Institute (NCI)|National Institutes of Health Clinical Center (CC)		Interventional	https://ClinicalTrials.gov/show/NCT01479582
	Phase 2	Meloxicam vs Placebo for Mobilization	Non-Hodgkin's Lymphoma|Hodgkin's Lymphoma|Multiple Myeloma|Hematopoietic Stem Cells	Drug: GCSF|Drug: meloxicam|Drug: Placebo	Massachusetts General Hospital|The Leukemia and Lymphoma Society		Interventional	https://ClinicalTrials.gov/show/NCT02003625
	Phase 2	Infusional Carfilzomib in Patients With Relapsed or Refractory Multiple Myeloma	Multiple Myeloma	Drug: Carfilzomib	Memorial Sloan Kettering Cancer Center|Amgen		Interventional	https://ClinicalTrials.gov/show/NCT01351623
	Phase 2	Lenalidomide Maintenance Therapy for Multiple Myeloma	Multiple Myeloma	Drug: Lenalidomide	National Cancer Institute (NCI)|Celgene Corporation|National Institutes of Health Clinical Center (CC)		Interventional	https://ClinicalTrials.gov/show/NCT01675141
	Phase 2	Evaluate the Efficacy of Sorafenib in Renal Cell Carcinoma Patients After a Radical Resection of the Metastases	Metastatic Renal Cell Carcinoma	Drug: sorafenib	Fondazione IRCCS Istituto Nazionale dei Tumori, Milano		Interventional	https://ClinicalTrials.gov/show/NCT01444807
	Phase 2	Bevacizumab vs Dacarbazine in Metastatic Melanoma	Metastatic Malignant Melanoma|Unresectable Malignant Melanoma	Drug: Bevacizumab|Drug: Propranolol|Drug: Enalapril|Drug: Dacarbazine	Haukeland University Hospital|The Norwegian Melanoma Group|Norwegian Cancer Society		Interventional	https://ClinicalTrials.gov/show/NCT01705392
	Phase 2	Shorter Course Tacro After NMA, Related Donor PBSCT With High-dose Posttransplant Cy for Hard-to-Engraft Malignancies	Myelodysplastic Syndrome|Chronic Myelomonocytic Leukemia|Small Lymphocytic Lymphoma|Chronic Lymphocytic Leukemia|Prolymphocytic Leukemia|Chronic Myeloid Leukemia|Chronic Myeloproliferative Disorders|Multiple Myeloma|Plasma Cell Neoplasm|Plasma Cell Dyscrasia|Myelofibrosis|Polycythemia Vera|Essential Thrombocythemia|Plasma Cell Leukemia	Drug: Fludarabine|Drug: Cyclophosphamide|Radiation: Total body irradiation|Drug: Tacrolimus|Drug: Mycophenolate mofetil	Sidney Kimmel Comprehensive Cancer Center		Interventional	https://ClinicalTrials.gov/show/NCT02556931
	Phase 2	A Study of Filanesib (ARRY-520) and Carfilzomib in Patients With Advanced Multiple Myeloma	Advanced Multiple Myeloma	Drug: Carfilzomib, proteasome inhibitor; intravenous|Drug: Filanesib, KSP(Eg5) inhibitor; intravenous|Drug: Dexamethasone, steroid; oral or intravenous|Drug: Filgrastim, granulocyte-colony stimulating factor (G-CSF); subcutaneous	Array BioPharma		Interventional	https://ClinicalTrials.gov/show/NCT01989325
	Phase 2	Trial of Vemurafenib/Cobimetinib With or Without Bevacizumab in Patients With Stage IV BRAFV600 Mutant Melanoma	Melanoma|Metastatic Melanoma	Drug: Vemurafenib|Drug: Bevacizumab|Drug: Cobimetinib	Melanoma Research Foundation Breakthrough Consortium|Genentech, Inc.		Interventional	https://ClinicalTrials.gov/show/NCT01495988
	Phase 2	Combination of Lenalidomide and Rituximab in Chronic Lymphocytic Leukemia/Small Lymphocytic Lymphoma (CLL-SLL)	Leukemia|Lymphoma	Drug: Rituximab|Drug: Lenalidomide	M.D. Anderson Cancer Center|Celgene Corporation		Interventional	https://ClinicalTrials.gov/show/NCT01446133
	Phase 2	QUILT-3.030: Open Label Extension Study of Conatumumab and AMG 479	Advanced Solid Tumors|Carcinoid|Colorectal Cancer|Locally Advanced|Lymphoma|Metastatic Cancer|Non-Small Cell Lung Cancer|Sarcoma|Solid Tumors	Drug: FOLFOX6|Biological: Conatumumab|Biological: Conatumumab|Biological: Ganitumab|Biological: Bevacizumab|Biological: Ganitumab	Amgen		Interventional	https://ClinicalTrials.gov/show/NCT01327612
	Phase 2	Trial of Combination of Ixazomib and Lenalidomide and Dexamethasone in Smoldering Multiple Myeloma	Smoldering Multiple Myeloma	Drug: Ixazomib|Drug: Lenalidomide|Drug: Dexamethasone	Dana-Farber Cancer Institute|Celgene|Takeda		Interventional	https://ClinicalTrials.gov/show/NCT02916771
	Phase 2	Imaging in MGUS, SMM and MM	Multiple Myeloma|Smoldering Multiple Myeloma|Monoclonal Gammopathy of Undetermined Significance	Drug: 18-NaF PET|Other: DCE-MRI|Drug: 18-FDG PET/CT	National Cancer Institute (NCI)|National Institutes of Health Clinical Center (CC)		Interventional	https://ClinicalTrials.gov/show/NCT01237054
	Phase 2	Safety and Efficacy of BL-8040 for the Mobilization of Donor Hematopoietic Stem Cells and Allogeneic Transplantation in Patients With Advanced Hematological Malignancies	Acute Myelogenous Leukemia|Acute Lymphoblastic Leukemia|Chronic Myelogenous Leukemia|Non-Hodgkin's Lymphoma|Non-Hodgkin Lymphoma|Hodgkin Disease|Hodgkins Disease|Hodgkin's Disease|Multiple Myeloma|Myelodysplastic Syndrome|Myeloproliferative Neoplasm	Drug: BL-8040|Procedure: Leukapheresis|Procedure: Hematopoietic cell transplant	Washington University School of Medicine|BioLineRx, Ltd.		Interventional	https://ClinicalTrials.gov/show/NCT02639559
	Phase 2	Efficacy and Safety of G-202 in PSMA-Positive Glioblastoma	Glioblastoma	Drug: G-202	GenSpera, Inc.|John Wayne Cancer Institute		Interventional	https://ClinicalTrials.gov/show/NCT02876003
	Phase 2	Efficacy, Safety and CNS Exposure of G-202 (Mipsagargin) in Patients With Recurrent or Progressive Glioblastoma	Glioblastoma Multiforme	Drug: G-202	GenSpera, Inc.		Interventional	https://ClinicalTrials.gov/show/NCT02067156
	Phase 2	Clarithromycin, Sulfamethoxazole/Trimethoprim or Observation in Newly Diagnosed Multiple Myeloma	Multiple Myeloma|Infection	Drug: Standard myeloma treatment|Drug: Clarithromycin|Drug: Sulfamethoxazole/trimethoprim|Drug: Observation	Henrik Gregersen|Danish Myeloma Study Group|Aalborg Universitetshospital		Interventional	https://ClinicalTrials.gov/show/NCT02624440
	Phase 2	Frontline Therapy in de Novo Multiple Myeloma Patients Under 65	Multiple Myeloma	Drug: Lenalidomide, Bortezomib	University Hospital, Toulouse|Celgene Corporation|Janssen-Cilag Ltd.		Interventional	https://ClinicalTrials.gov/show/NCT01206205
	Phase 2	Study of Sunitinib in Subjects With High Risk Renal Cell Carcinoma	Renal Cell Carcinoma	Drug: Sunitinib|Other: Tumor biopsy|Procedure: Nephrectomy|Other: Biomarkers	Jonsson Comprehensive Cancer Center|Pfizer		Interventional	https://ClinicalTrials.gov/show/NCT01070186
	Phase 2	A Study of Siltuximab (Anti- IL 6 Monoclonal Antibody) in Patients With High-risk Smoldering Multiple Myeloma	High-risk Smoldering Multiple Myeloma	Drug: Siltuximab|Drug: Placebo	Janssen Research & Development, LLC		Interventional	https://ClinicalTrials.gov/show/NCT01484275
	Phase 2	A Study to Determine the Efficacy of the Combination of Daratumumab (DARA) Plus Durvalumab (DURVA) (D2) in Subjects With Relapsed and Refractory Multiple Myeloma (RRMM)	Multiple Myeloma	Drug: DARATUMUMAB|Drug: DURVALUMAB	Celgene		Interventional	https://ClinicalTrials.gov/show/NCT03000452
	Phase 2	Sirolimus, Tacrolimus, Thymoglobulin and Rituximab as Graft-versus-Host-Disease Prophylaxis in Patients Undergoing Haploidentical and HLA Partially Matched Donor Hematopoietic Cell Transplantation	Chronic Myeloproliferative Disorders|Graft Versus Host Disease|Leukemia|Lymphoma|Lymphoproliferative Disorder|Multiple Myeloma and Plasma Cell Neoplasm|Myelodysplastic Syndromes|Myelodysplastic/Myeloproliferative Neoplasms	Biological: anti-thymocyte globulin|Biological: rituximab|Drug: sirolimus|Drug: tacrolimus|Other: laboratory biomarker analysis|Procedure: allogeneic hematopoietic stem cell transplantation|Procedure: management of therapy complications|Procedure: peripheral blood stem cell transplantation	Barbara Ann Karmanos Cancer Institute|National Cancer Institute (NCI)		Interventional	https://ClinicalTrials.gov/show/NCT01116232
	Phase 2	Sorafenib Plus Hepatic Arterial Infusion Versus Sorafenib for HCC With Major Portal Vein Tumor Thrombosis	HepatoCellular Carcinoma|Portal Vein Thrombosis	Procedure: HAIC|Drug: Sorafenib	Peking University		Interventional	https://ClinicalTrials.gov/show/NCT03009461
	Phase 2	Weekly 70 mg/m2 Carfilzomib for Multiple Myeloma Patients Refractory to 27 mg/m2 Carfilzomib	Multiple Myeloma	Drug: Carfilzomib|Drug: Dexamethasone|Drug: Prednisone|Drug: Methylprednisolone	Oncotherapeutics|Onyx Therapeutics, Inc.		Interventional	https://ClinicalTrials.gov/show/NCT02294357
	Phase 2	Carfilzomib, Lenalidomide, and Dexamethasone for Smoldering Multiple Myeloma	Multiple Myeloma	Drug: Carfilzomib|Drug: Revlimid|Drug: Dexamethasone	National Cancer Institute (NCI)|National Institutes of Health Clinical Center (CC)		Interventional	https://ClinicalTrials.gov/show/NCT01572480
	Phase 2	Panobinostat Biological Correlates Study	Nodal Lymphoma|Lymphoma With Cutaneous Involvement|Lymphoma in Leukemic Phase|Marrow Involvement With Lymphoma|Multiple Myeloma	Drug: panobinostat	Peter MacCallum Cancer Centre, Australia		Interventional	https://ClinicalTrials.gov/show/NCT01658241
	Phase 2	Study of Tecemotide (L-BLP25) in Subjects With Slowly Progressive Multiple Myeloma With no Symptoms and Who Have Had no Chemotherapy	Multiple Myeloma	Biological: Tecemotide (L-BLP25)|Biological: Tecemotide (L-BLP25)|Drug: Single low dose cyclophosphamide|Drug: Multiple low dose cyclophosphamide	Merck KGaA		Interventional	https://ClinicalTrials.gov/show/NCT01094548
	Phase 2	1630GCC: Zydelig Maintenance in B-Cell Non-Hodgkin's Lymphoma After Autologous Stem Cell Transplantation	Non Hodgkin Lymphoma|Follicular Lymphoma|Indolent Lymphoma|B-cell Lymphoma|Transformed Lymphoma|Marginal Zone Lymphoma|Waldenstrom Macroglobulinemia|Small Lymphocytic Lymphoma|Lymphoplasmacytic Lymphoma	Drug: Zydelig	University of Maryland|Gilead Sciences|Washington University School of Medicine|Virginia Commonwealth University		Interventional	https://ClinicalTrials.gov/show/NCT03133221
	Phase 2	A Phase 2 Trial of Filanesib in Relapsed/Refractory Multiple Myeloma (AfFIRM)	Advanced Multiple Myeloma	Drug: Filanesib, KSP (Eg5) inhibitor; intravenous|Drug: Filgrastim, granulocyte-colony stimulating factor (G-CSF); subcutaneous	Array BioPharma		Interventional	https://ClinicalTrials.gov/show/NCT02092922
	Phase 2	Pembrolizumab (MK-3475) in MM Patients With Residual Disease	Multiple Myeloma	Drug: Pembrolizumab	PETHEMA Foundation|Merck Sharp & Dohme Corp.|Adknoma Health Research		Interventional	https://ClinicalTrials.gov/show/NCT02636010
	Phase 2	Bortezomib Consolidation Trial	Multiple Myeloma	Drug: Bortezomib	University College, London		Interventional	https://ClinicalTrials.gov/show/NCT01517724
	Phase 2	UARK 2010-35, A Study of Expanded Natural Killer Cell Therapy for Multiple Myeloma	Multiple Myeloma	Drug: Bortezomib	University of Arkansas|National Institutes of Health (NIH)		Interventional	https://ClinicalTrials.gov/show/NCT01313897
	Phase 2	Safety and Efficacy Study of Single Weekly Bortezomib in Newly Diagnosed Multiple Myeloma	Multiple Myeloma	Drug: Bortezomib	Boston VA Research Institute, Inc.|Millennium Pharmaceuticals, Inc.		Interventional	https://ClinicalTrials.gov/show/NCT01090921
	Phase 2	Study of BHQ880 in Patients With High Risk Smoldering Multiple Myeloma	Smoldering Multiple Myeloma	Drug: BHQ880	Novartis Pharmaceuticals|Novartis		Interventional	https://ClinicalTrials.gov/show/NCT01302886
	Phase 2	Elotuzumab, Lenalidomide and Dexamethasone (ERd) in the Induction, Consolidation and Maintenance Treatment of Transplant-Eligible, Newly Diagnosed Multiple Myeloma Patients	Multiple Myeloma	Drug: elotuzumab|Drug: Lenalidomide|Drug: Dexamethasone|Procedure: autologous stem cell transplantation	SCRI Development Innovations, LLC|Bristol-Myers Squibb		Interventional	https://ClinicalTrials.gov/show/NCT02843074
	Phase 2	Bortezomib and Bendamustine to Treat Relapsed/Refractory Myeloma	Multiple Myeloma	Drug: Bendamustine|Drug: Bortezomib	New York University School of Medicine|Cephalon		Interventional	https://ClinicalTrials.gov/show/NCT01315873
	Phase 2	Lenalidomide and Prednisone in Low and Int-1 Myelodysplastic Syndrome (MDS) Non 5q MDS	Myelodysplastic Syndrome|MDS	Drug: Prednisone|Drug: Lenalidomide	H. Lee Moffitt Cancer Center and Research Institute|Celgene Corporation		Interventional	https://ClinicalTrials.gov/show/NCT01133275
	Phase 2	Velcade Consolidation Bone Study	Multiple Myeloma	Drug: bortezomib	Janssen-Cilag International NV		Interventional	https://ClinicalTrials.gov/show/NCT01286077
	Phase 2	Hemostatic Effects of VELCADEÂ®* Treatment in Multiple Myeloma Patients	Multiple Myeloma	Drug: Velcade	University of Utah		Interventional	https://ClinicalTrials.gov/show/NCT01720043
	Phase 2	Maintenance Treatment of Multiple Myeloma (MM) After Autologous Peripheral Blood Transplant (PBSCT) Using Polyethylene Glycol alpha2B Interpheron (PEG-INTRON)	Multiple Mieloma	Drug: PEG-Intron sc injection	FundaciÃ³n de InvestigaciÃ³n BiomÃ©dica - Hospital Universitario de La Princesa|Haematology Service,		Interventional	https://ClinicalTrials.gov/show/NCT01325896
	Phase 2	NCI-MATCH: Targeted Therapy Directed by Genetic Testing in Treating Patients With Advanced Refractory Solid Tumors, Lymphomas, or Multiple Myeloma	Advanced Malignant Solid Neoplasm|Lymphoma|Recurrent Malignant Solid Neoplasm|Recurrent Plasma Cell Myeloma|Refractory Malignant Neoplasm|Refractory Plasma Cell Myeloma	Drug: Afatinib|Drug: Akt inhibitor AZD5363|Drug: Binimetinib|Drug: Crizotinib|Other: Cytology Specimen Collection Procedure|Drug: Dabrafenib|Drug: Dasatinib|Drug: Defactinib|Drug: FGFR Inhibitor AZD4547|Other: Laboratory Biomarker Analysis|Biological: Nivolumab|Drug: Osimertinib|Drug: Palbociclib|Biological: Pertuzumab|Drug: PI3K-beta Inhibitor GSK2636771|Drug: Sapanisertib|Drug: Sunitinib Malate…	National Cancer Institute (NCI)		Interventional	https://ClinicalTrials.gov/show/NCT02465060
	Phase 2	Carfilzomib, Lenalidomide, and Dexamethasone in New Multiple Myeloma Patients	Multiple Myeloma	Drug: Carfilzomib|Drug: Lenalidomide|Drug: Dexamethasone|Drug: Lenalidomide|Drug: Lenalidomide	National Cancer Institute (NCI)|Celgene|Onyx Therapeutics, Inc.|National Institutes of Health Clinical Center (CC)		Interventional	https://ClinicalTrials.gov/show/NCT01402284
	Phase 2	Clinical Activity of Metformin With High-dose of Dexamethasone in Relapse Multiple Myeloma	Multiple Myeloma	Drug: Metformin XR|Drug: Dexamethasone	University of Campinas, Brazil		Interventional	https://ClinicalTrials.gov/show/NCT02967276
	Phase 2	IGF-1 Inhibitor Pasireotide Lar in Combination With the m-TOR Inhibitor Everolimus	Multiple Myeloma	Drug: Pasireotide|Drug: Everolimus	Milton S. Hershey Medical Center		Interventional	https://ClinicalTrials.gov/show/NCT01234974
	Phase 2	MLN9708 and Dexamethasone for High-Risk Smoldering Multiple Myeloma	Multiple Myeloma	Drug: MLN9708|Drug: Dexamethasone	National Cancer Institute (NCI)|National Institutes of Health Clinical Center (CC)		Interventional	https://ClinicalTrials.gov/show/NCT01660997
	Phase 2	Open-label Extended Access Program on Lenalidomide Plus Dexamethasone in Chinese Subjects With Relapsed/Refractory Multiple Myeloma Who Participated in CC-5013-MM021 for at Least 1 Year	Multiple Myeloma	Drug: Lenalidomide|Drug: Dexamethasone	Celgene Corporation		Interventional	https://ClinicalTrials.gov/show/NCT02348528
	Phase 2	Japanese Phase 2 Study to Evaluate the Efficacy and Safety of Pomalidomide in Subjects With Relapsed and Refractory Multiple Myeloma	Multiple Myeloma	Drug: Pomalidomide|Drug: Dexamethasone	Celgene Corporation		Interventional	https://ClinicalTrials.gov/show/NCT02011113
	Phase 2	Pomalidomide and Dexamethasone Effects in Multiple Myeloma Patients With Del 17p or t (4;14)	Multiple Myeloma	Drug: POMALIDOMIDE|Drug: Dexamethasone	University Hospital, Lille|Celgene Corporation		Interventional	https://ClinicalTrials.gov/show/NCT01745640
	Phase 2	A Phase 2 Study of Lenalidomide to Evaluate the Efficacy in Japanese Patients With Newly Diagnosed Multiple Myeloma	Multiple Myeloma	Drug: Lenalidomide|Drug: dexamethasone	Celgene Corporation		Interventional	https://ClinicalTrials.gov/show/NCT01698801
	Phase 2	Study of Lenalidomide and Low-Dose Dexamethasone in Chinese Subjects With Relapsed/Refractory Multiple Myeloma	Multiple Myeloma	Drug: Lenalidomide|Drug: Dexamethasone	Celgene Corporation		Interventional	https://ClinicalTrials.gov/show/NCT01593410
	Phase 2	Study to Evaluate Two Lenalidomide Dose Regimens With Low Dose Dexamethasone for the Treatment Relapsed Multiple Myeloma	Multiple Myeloma	Drug: Lenalidomide 15mg|Drug: Lenalidomide 25mg	Boston VA Research Institute, Inc.|Celgene Corporation|Kansas City Veteran Affairs Medical Center|VA Pittsburgh Healthcare System|VA Greater Los Angeles Healthcare System|Michael Debakey Veterans Affairs Medical Center|Edward Hines Jr. VA Hospital		Interventional	https://ClinicalTrials.gov/show/NCT01380106
	Phase 2	A Study of Melflufen in Combination With Dexamethasone in Relapsed Refractory Multiple Myeloma Patients	Multiple Myeloma	Drug: Melflufen|Drug: Dexamethasone	Oncopeptides AB|Precision Oncology		Interventional	https://ClinicalTrials.gov/show/NCT02963493
	Phase 2	Testing JNJ-42756493 In Combination With Dexamethasone in Multiple Myeloma That Came Back After a Period of Improvement	Multiple Myeloma|Relapsed/Refractory	Drug: JNJ-42756493|Drug: Dexamethasone	University Health Network, Toronto		Interventional	https://ClinicalTrials.gov/show/NCT02952573
	Phase 2	Study of Carfilzomib in Combination w/Dexamethasone in Patients w/Newly Diagnosed Multiple Myeloma	Multiple Myeloma	Drug: Carfilzomib|Drug: Dexamethasone	Emory University|Onyx Therapeutics, Inc.		Interventional	https://ClinicalTrials.gov/show/NCT01969565
	Phase 2	Maintenance Therapy With Subcutaneous Bortezomib	Multiple Myeloma	Drug: Bortezomib|Drug: Dexamethasone	Stichting Hemato-Oncologie voor Volwassenen Nederland|Fondazione Neoplasie Sangue Onlus		Interventional	https://ClinicalTrials.gov/show/NCT01913730
	Phase 2	Study of the Bruton's Tyrosine Kinase Inhibitor in Subjects With Relapsed or Relapsed and Refractory Multiple Myeloma	Multiple Myeloma	Drug: PCI-32765|Drug: Dexamethasone	Pharmacyclics LLC.		Interventional	https://ClinicalTrials.gov/show/NCT01478581
	Phase 2	Efficacy and Safety Study of SyB L-0501 for Patients With Multiple Myeloma	Multiple Myeloma	Drug: SyB L-0501|Drug: prednisolone	SymBio Pharmaceuticals		Interventional	https://ClinicalTrials.gov/show/NCT01179490
	Phase 2	Busulfan, Melphalan, Fludarabine and T-Cell Depleted Allogeneic Hematopoietic Stem Cell Transplantation Followed by Post Transplantation Donor Lymphocyte Infusions	Multiple Myeloma	Drug: busulfan, melphalan and fludarabine|Drug: busulfan, melphalan and fludarabine	Memorial Sloan Kettering Cancer Center|Otsuka America Pharmaceutical|Ludwig Institute for Cancer Research		Interventional	https://ClinicalTrials.gov/show/NCT01131169
	Phase 2	Auto Transplant High Dose Melphalan vs High Dose Melphalan+Bortezomib in Pts With Multiple Myeloma Age 65 Years or Older	Multiple Myeloma	Drug: Melphalan|Drug: Bortezomib	Hackensack University Medical Center		Interventional	https://ClinicalTrials.gov/show/NCT01453088
	Phase 2	Busulfan and Melphalan Conditioning in Multiple Myeloma	Multiple Myeloma	Drug: BUSULFEXÂ®|Drug: AlkeranÂ®	Chonnam National University Hospital|Korea Otsuka Pharmaceutical Co., Ltd.		Interventional	https://ClinicalTrials.gov/show/NCT01923935
	Phase 2	A Study to Evaluate 3 Dose Schedules of Daratumumab in Participants With Smoldering Multiple Myeloma	Multiple Myeloma	Drug: daratumumab|Drug: daratumumab|Drug: daratumumab	Janssen Research & Development, LLC		Interventional	https://ClinicalTrials.gov/show/NCT02316106
	Phase 2	Romidepsin and Lenalidomide in Treating Patients With Previously Untreated Peripheral T-Cell Lymphoma	Adult Nasal Type Extranodal NK/T-cell Lymphoma|Anaplastic Large Cell Lymphoma|Angioimmunoblastic T-cell Lymphoma|Hepatosplenic T-cell Lymphoma|Peripheral T-cell Lymphoma|Stage I Cutaneous T-cell Non-Hodgkin Lymphoma|Stage IA Mycosis Fungoides/Sezary Syndrome|Stage IB Mycosis Fungoides/Sezary Syndrome|Stage II Cutaneous T-cell Non-Hodgkin Lymphoma|Stage IIA Mycosis Fungoides/Sezary Syndrome|Stage …	Drug: romidepsin|Drug: lenalidomide|Other: laboratory biomarker analysis	Northwestern University|Celgene|National Cancer Institute (NCI)		Interventional	https://ClinicalTrials.gov/show/NCT02232516
	Phase 2	Reduced Intensity Chemotherapy and Radiation Therapy Before Donor Stem Cell Transplant in Treating Patients With Hematologic Malignancies	Acute Myeloid Leukemia|Acute Myeloid Leukemia in Remission|Aplastic Anemia|Chronic Myelomonocytic Leukemia|Hodgkin Lymphoma|Indolent Non-Hodgkin Lymphoma|Malignant Neoplasm|Myelodysplastic Syndrome|Myeloproliferative Neoplasm|Plasma Cell Myeloma|Refractory Anemia|Refractory Anemia With Excess Blasts|Refractory Anemia With Ring Sideroblasts|Refractory Cytopenia With Multilineage Dysplasia|Refracto…	Drug: Fludarabine|Radiation: Total-Body Irradiation|Biological: T Cell-Depleted Donor Lymphocyte Infusion|Drug: Cyclophosphamide|Procedure: Peripheral Blood Stem Cell Transplantation|Procedure: Allogeneic Hematopoietic Stem Cell Transplantation|Drug: Tacrolimus|Drug: Mycophenolate mofetil	Sidney Kimmel Cancer Center at Thomas Jefferson University|Thomas Jefferson University		Interventional	https://ClinicalTrials.gov/show/NCT02566304
	Phase 2	Panobinostat (LBH589): Multiple Myeloma - Autologous Hematopoietic Cell Transplantation (HCT)	Multiple Myeloma	Drug: Panobinostat	H. Lee Moffitt Cancer Center and Research Institute|Novartis Pharmaceuticals		Interventional	https://ClinicalTrials.gov/show/NCT02722941
	Phase 2	A Study of Avastin (Bevacizumab) in Patients With Multiple Myeloma	Multiple Myeloma	Drug: Bevacizumab	Hoffmann-La Roche		Interventional	https://ClinicalTrials.gov/show/NCT02079519
	Phase 2	Cixutumumab and Temsirolimus in Treating Younger Patients With Recurrent or Refractory Sarcoma	Childhood Alveolar Soft-part Sarcoma|Childhood Angiosarcoma|Childhood Epithelioid Sarcoma|Childhood Fibrosarcoma|Childhood Gliosarcoma|Childhood Leiomyosarcoma|Childhood Liposarcoma|Childhood Neurofibrosarcoma|Childhood Synovial Sarcoma|Previously Treated Childhood Rhabdomyosarcoma|Recurrent Childhood Rhabdomyosarcoma|Recurrent Childhood Soft Tissue Sarcoma|Recurrent Ewing Sarcoma/Peripheral Prim…	Biological: cixutumumab|Drug: temsirolimus|Other: laboratory biomarker analysis	National Cancer Institute (NCI)		Interventional	https://ClinicalTrials.gov/show/NCT01614795
	Phase 2	Trabectedin for Recurrent Grade II/III Meningioma	Recurrent High Grade Meningioma	Drug: Trabectedin|Other: Local standard of care	European Organisation for Research and Treatment of Cancer - EORTC		Interventional	https://ClinicalTrials.gov/show/NCT02234050
	Phase 2	A Trial Evaluating Efficacy & Safety of RVD +/- Panobinostat in Transplant Eligible, Newly Diagnosed Multiple Myeloma (NDMM)	Multiple Myeloma	Drug: Revlimid|Drug: Velcade|Drug: dexamethasone|Drug: Farydak	Novartis Pharmaceuticals|Novartis		Interventional	https://ClinicalTrials.gov/show/NCT02720510
	Phase 2	Lenalidomide Maintenance in Plasma Cell Myeloma	Plasma Cell Myeloma	Drug: Lenalidomide	Memorial Sloan Kettering Cancer Center		Interventional	https://ClinicalTrials.gov/show/NCT02538198
	Phase 2	Lenalidomide Intensification in Patients With Serologic/Asymptomatic Progression of Multiple Myeloma While on Lenalidomide Maintenance	Multiple Myeloma	Drug: lenalidomide	Memorial Sloan Kettering Cancer Center|Montefiore Medical Center|State University of New York - Downstate Medical Center|University of Rochester|Weill Medical College of Cornell University|Stamford Hospital|Columbia University|State University of New York - Upstate Medical University		Interventional	https://ClinicalTrials.gov/show/NCT01463670
	Phase 2	Pomalidomide in Gene Expression Profiling (GEP)-Defined High-risk Multiple Myeloma	Multiple Myeloma	Drug: Pomalidomide	University of Arkansas|Celgene Corporation		Interventional	https://ClinicalTrials.gov/show/NCT01177735
	Phase 2	Phase II Study of Simvastatin for Relapsed/Refractory Myeloma	Myeloma	Drug: Simvastatin,Zoledronic Acid,Bortezomib,Bendamustine,Methylprednisolone.	James Graham Brown Cancer Center		Interventional	https://ClinicalTrials.gov/show/NCT01332617
	Phase 2	Bendamustine, Lenalidomide (RevlimidÂ®) and Dexamethasone (BRd) as 2nd-line Therapy for Patients With Relapsed or Refractory Multiple Myeloma	Multiple Myeloma	Drug: Bendamustine	Cantonal Hospital of St. Gallen|Celgene Corporation|Mundipharma Research GmbH & Co KG|Mundipharma Medical Company|Amgen		Interventional	https://ClinicalTrials.gov/show/NCT01701076
	Phase 2	A Single Arm Study of Carfilzomib in Transplant Eligible High Risk Multiple Myeloma	Multiple Myeloma	Drug: Carfilzomib, Cyclophosphamide, Dexamethasone	Singapore General Hospital		Interventional	https://ClinicalTrials.gov/show/NCT02217163
	Phase 2	Carfilzomib, Cyclophosphamide and Dexamethasone In Newly Diagnosed Multiple Myeloma Patients	Multiple Myeloma	Drug: CARFILZOMIB, CYCLOPHOSPHAMIDE, DEXAMETHASONE	Stichting Hemato-Oncologie voor Volwassenen Nederland|Fondazione Neoplasie Sangue Onlus		Interventional	https://ClinicalTrials.gov/show/NCT01346787
	Phase 2	Administration of Tadalafil in Conjunction With Lenalidomide and Dexamethasone in Patients With Multiple Myeloma	Multiple Myeloma	Drug: Tadalafil, Cialis	Sidney Kimmel Comprehensive Cancer Center		Interventional	https://ClinicalTrials.gov/show/NCT01374217
	Phase 2	Carfilzomib Thalidomide and Dexamethasone in Patients With Relapsed and/or Refractory Multiple Myeloma	Relapsed and/or Refractory Multiple Myeloma	Drug: Carfilzomib, Thalidomide and Dexamethasone	National University Hospital, Singapore|The Australasian Leukaemia & Lymphoma Group (ALLG)|International Myeloma Foundation (IMF)|Celgene		Interventional	https://ClinicalTrials.gov/show/NCT03140943
	Phase 2	Phase II, Single-Center, Oral Panobinostat in Combination With Lenalidomide and Dexamethasone in Multiple Myeloma (MM)	Multiple Myeloma	Drug: Panobinostat, Lenalidomide and Dexamethasone	Ajai Chari|Novartis Pharmaceuticals|Icahn School of Medicine at Mount Sinai		Interventional	https://ClinicalTrials.gov/show/NCT01651039
	Phase 2	Pegylated Liposomal Doxorubicin, Bortezomib, Dexamethasone and Lenalidomide for Relapsed/Refractory Multiple Myeloma	Multiple Myeloma	Drug: DVD-R	Oncotherapeutics|Celgene Corporation		Interventional	https://ClinicalTrials.gov/show/NCT01160484
	Phase 2	Bendamustine Plus Bortezomib Plus Dexamethasone in Relapsed or Refractory Multiple Myeloma	Multiple Myeloma	Drug: bendamustine plus bortezomib plus dexamethasone	Austrian Forum Against Cancer		Interventional	https://ClinicalTrials.gov/show/NCT01168804
	Phase 2	Study of Bendamustine, Velcade and Dexamethasone in the Treatment of Elderly Patients With Multiple Myeloma	Multiple Myeloma	Drug: Bendamustine, Velcade and Dexamethasone	Intergroupe Francophone du Myelome		Interventional	https://ClinicalTrials.gov/show/NCT01045681
	Phase 2	Two Cycles of PAD Combination by AHCT in MM	Multiple Myeloma	Drug: PAD combination	Cooperative Study Group A for Hematology		Interventional	https://ClinicalTrials.gov/show/NCT01370434
	Phase 2	Sequential High-dose Dexamethasone and Response Adopted PAD or VAD Induction Chemotherapy Followed by High-dose Chemotherapy With Autologous Stem Cell Transplantation for Newly Diagnosed Multiple Myeloma	Multiple Myeloma	Drug: high dose dexamethsone	Yonsei University		Interventional	https://ClinicalTrials.gov/show/NCT01255514
	Phase 2	Randomized Trial Comparing Lenalidomide With Low Dose Dexamethasone Versus Lenalidomide in Second Line Multiple Myeloma	Multiple Myeloma	Drug: Revlimid	Karolinska University Hospital		Interventional	https://ClinicalTrials.gov/show/NCT01450215
	Phase 2	A Open-label Study of Ultra-High Dose Dexamethasone for Relapsed Multiple Myeloma	Multiple Myeloma	Drug: Dexamethasone	Boston Medical Center		Interventional	https://ClinicalTrials.gov/show/NCT02402725
	Phase 2	Vorinostat, Bortezomib and Dexamethasone in Multiple Myeloma	Multiple Myeloma	Drug: Vorinostat Velcade Dexamethasone	University of Leeds		Interventional	https://ClinicalTrials.gov/show/NCT01720875
	Phase 2	Allogeneic Hematopoietic Stem Cell Transplantation for Multiple Myeloma	Multiple Myeloma	Drug: Fludarabine monophosphate, melphalan, Bortezomib	Hackensack University Medical Center		Interventional	https://ClinicalTrials.gov/show/NCT01453101
	Phase 2	A Randomized Study With Oral Melphalan + Prednisone (MP) Versus Melphalan, + Prednisone + Thalidomide (MPT) for Newly Diagnosesd Elderly Patients With Multiple Myeloma	Multiple Myeloma	Drug: Melphalan, Prednisone and Thalidomide	Gruppo Italiano Studio Linfomi		Interventional	https://ClinicalTrials.gov/show/NCT01274403
	Phase 2	Bendamustine, Prednisone and VelcadeÂ® for First-line Treatment of Patients With Symptomatic Multiple Myeloma	Multiple Myeloma	Drug: Bendamustine, Bortezomib, Prednisone	University Hospital Heidelberg|German Cancer Research Center|Janssen-Cilag International NV|Mundipharma Research GmbH & Co KG|inVentiv Health Clinical		Interventional	https://ClinicalTrials.gov/show/NCT02237261
	Phase 2	Revlimid And Prednisone Followed By Revlimid, Melphalan And Prednisone In Multiple Myeloma Patients	Multiple Myeloma	Drug: RP followed by MPR	Fondazione Neoplasie Sangue Onlus		Interventional	https://ClinicalTrials.gov/show/NCT01160107
	Phase 2	Study of Carfilzomib Weekly Plus Melphalan and Prednisone in Untreated Symptomatic Elderly Multiple Myeloma	Multiple Myeloma	Drug: Carfilzomib	University Hospital, Lille|Amgen		Interventional	https://ClinicalTrials.gov/show/NCT02302495
	Phase 2	Pharmacokinetic Study of Propylene Glycol-Free Melphalan HCl for Myeloablative Conditioning in Multiple Myeloma Patients Undergoing Autologous Transplantation	Multiple Myeloma	Drug: Melphalan HCl for injection (propylene glycol free)	Medical College of Wisconsin		Interventional	https://ClinicalTrials.gov/show/NCT02669615
	Phase 2	High Dose Chemotherapy Using BeEAM for Autologous Transplant in Multiple Myeloma	Multiple Myeloma	Drug: BeEAM	Northside Hospital, Inc.|Teva Pharmaceuticals USA		Interventional	https://ClinicalTrials.gov/show/NCT02416206
	Phase 2	Safety and Efficacy Study of High Dose Melphalan HCL for Injection (Propylene Glycol-Free) for Myeloablative Conditioning in Multiple Myeloma Patients Undergoing Autologous Transplantation	Multiple Myeloma	Drug: High-Dose Melphalan HCL for Injection (Propylene Glycol-Free)	Spectrum Pharmaceuticals, Inc|Clinipace LTD|Kansas City Bioanalytical Laboratories|Beckloff Associates, Inc.		Interventional	https://ClinicalTrials.gov/show/NCT01660633
	Phase 2	UARK 2014-14: Phase II Prospective Evaluation of Bone Remodeling During Ixazomib Treatment	Multiple Myeloma	Drug: Ixazomib	University of Arkansas|Millennium Pharmaceuticals, Inc.		Interventional	https://ClinicalTrials.gov/show/NCT02499081
	Phase 2	Determining the Feasibility of MLN9708 as Maintenance After Allogeneic Stem Cell Transplant for Multiple Myeloma	Multiple Myeloma	Drug: MLN9708	SCRI Development Innovations, LLC|Millennium Pharmaceuticals, Inc.		Interventional	https://ClinicalTrials.gov/show/NCT02168101
	Phase 2	Prevention of Treatment Induced Neuropathy in Multiple Myeloma	Myeloma	Other: Placebo|Drug: Minocycline	M.D. Anderson Cancer Center|National Cancer Institute (NCI)		Interventional	https://ClinicalTrials.gov/show/NCT01283997
	Phase 2	Treatment of Resistant Port-wine Stains With Bosentan and Pulsed Dye Laser: a Pilot Study	Port-wine Stains	Drug: Bosentan|Device: Pulsed dye laser (PDL)	Centre Hospitalier Universitaire de Nice		Interventional	https://ClinicalTrials.gov/show/NCT02317679
	Phase 2	Donor Umbilical Cord Blood Stem Cell Transplant in Treating Patients With Hematologic Malignancies	Acute Myeloid Leukemia With Multilineage Dysplasia Following Myelodysplastic Syndrome|Adult Acute Lymphoblastic Leukemia in Remission|Adult Acute Megakaryoblastic Leukemia (M7)|Adult Acute Minimally Differentiated Myeloid Leukemia (M0)|Adult Acute Monoblastic Leukemia (M5a)|Adult Acute Monocytic Leukemia (M5b)|Adult Acute Myeloid Leukemia in Remission|Adult Acute Myeloid Leukemia With 11q23 (MLL)…	Procedure: double-unit umbilical cord blood transplantation|Other: cytogenetic analysis|Procedure: bone marrow aspiration|Other: fluorescence in situ hybridization|Drug: busulfan|Drug: cyclophosphamide|Drug: anti-thymocyte globulin|Drug: methylprednisolone|Drug: cyclosporine|Drug: mycophenolate mofetil|Other: flow cytometry|Procedure: allogeneic hematopoietic stem cell transplantation	Case Comprehensive Cancer Center		Interventional	https://ClinicalTrials.gov/show/NCT01093586
	Phase 2	High Dose Cyclophosphamide, Tacrolimus, and Mycophenolate Mofetil in Preventing Graft Versus Host Disease in Patients With Hematological Malignancies Undergoing Myeloablative or Reduced Intensity Donor Stem Cell Transplant	Acute Leukemia|Chronic Lymphocytic Leukemia/Small Lymphocytic Lymphoma|Chronic Myelogenous Leukemia, BCR-ABL1 Positive|Diffuse Large B-Cell Lymphoma|Follicular Lymphoma|Graft Versus Host Disease|Hodgkin Lymphoma|Mantle Cell Lymphoma|Marginal Zone Lymphoma|Myelodysplastic Syndrome|Myeloproliferative Neoplasm|Recurrent Acute Myeloid Leukemia With Myelodysplasia-Related Changes|Recurrent Plasma Cell…	Drug: Busulfan|Drug: Cyclophosphamide|Drug: Fludarabine Phosphate|Procedure: Hematopoietic Cell Transplantation|Other: Laboratory Biomarker Analysis|Drug: Melphalan Hydrochloride|Drug: Mycophenolate Mofetil|Procedure: Peripheral Blood Stem Cell Transplantation|Other: Quality-of-Life Assessment|Drug: Tacrolimus|Radiation: Total-Body Irradiation	City of Hope Medical Center|National Cancer Institute (NCI)		Interventional	https://ClinicalTrials.gov/show/NCT03128359
	Phase 2	A Study of Denosumab in Multiple Myeloma Patients With Renal Insufficiency	Multiple Myeloma	Drug: Denosumab Q4W	Massachusetts General Hospital|Amgen		Interventional	https://ClinicalTrials.gov/show/NCT02833610
	Phase 2	Rituximab in Preventing Acute Graft-Versus-Host Disease in Patients Undergoing a Donor Stem Cell Transplant for Hematologic Cancer	Accelerated Phase Chronic Myelogenous Leukemia|Adult Acute Lymphoblastic Leukemia in Remission|Adult Acute Myeloid Leukemia in Remission|Adult Nasal Type Extranodal NK/T-cell Lymphoma|Blastic Phase Chronic Myelogenous Leukemia|Contiguous Stage II Adult Burkitt Lymphoma|Contiguous Stage II Adult Diffuse Large Cell Lymphoma|Contiguous Stage II Adult Diffuse Mixed Cell Lymphoma|Contiguous Stage II A…	Drug: rituximab|Drug: mycophenolate mofetil|Drug: tacrolimus|Drug: anti-thymocyte globulin|Procedure: allogeneic hematopoietic stem cell transplantation|Other: laboratory biomarker analysis|Biological: graft versus host disease prophylaxis/therapy|Drug: cyclophosphamide|Drug: fludarabine phosphate|Drug: busulfan|Radiation: total-body irradiation|Biological: graft-versus-tumor induction therapy|Bi…	University of Nebraska|National Cancer Institute (NCI)		Interventional	https://ClinicalTrials.gov/show/NCT01044745
	Phase 2	BRAF/MEK Inhibition in Relapsed/Refractory Multiple Myeloma (BIRMA)	Relapsed or Refractory Multiple Myeloma|Patients With BRAFV600 E or BRAFV600K Mutation	Drug: Encorafenib|Drug: Binimetinib	University of Heidelberg Medical Center|Array BioPharma|German Cancer Research Center|Coordinating Centre for Clinical Trials Heidelberg|University Hospital Heidelberg		Interventional	https://ClinicalTrials.gov/show/NCT02834364
	Phase 2	A Phase IIa Study of Sotatercept on Bone Mass and Turnover in Patients With Multiple Myeloma	Multiple Myeloma	Drug: Sotatercept|Drug: Placebo	Rebecca Silbermann|Celgene|Indiana University		Interventional	https://ClinicalTrials.gov/show/NCT02230917
	Phase 2	Efficacity of Weekly Paclitaxel in Association or Not With Bevacizumab in Metastatic or Locally Advanced Angiosarcomas	Angiosarcoma	Drug: Paclitaxel|Drug: Bevacizumab	Centre Oscar Lambret|Groupe Sarcome FranÃ§ais|Groupe dâ€™Ã©tudes des Tumeurs Osseuses		Interventional	https://ClinicalTrials.gov/show/NCT01303497
	Phase 2	Bevacizumab With or Without TRC105 in Treating Patients With Metastatic Kidney Cancer	Clear Cell Renal Cell Carcinoma|Recurrent Renal Cell Carcinoma|Stage IV Renal Cell Cancer|Type 1 Papillary Renal Cell Carcinoma|Type 2 Papillary Renal Cell Carcinoma	Biological: Anti-Endoglin Chimeric Monoclonal Antibody TRC105|Biological: Bevacizumab|Other: Laboratory Biomarker Analysis|Other: Pharmacological Study	National Cancer Institute (NCI)		Interventional	https://ClinicalTrials.gov/show/NCT01727089
	Phase 2	A Two-Step Approach to Reduced Intensity Bone Marrow Transplant for Patients With Hematological Malignancies	Adult Acute Lymphoblastic Leukemia in Remission|Adult Acute Myeloid Leukemia in Remission|Adult Acute Myeloid Leukemia With 11q23 (MLL) Abnormalities|Adult Acute Myeloid Leukemia With Del(5q)|Adult Acute Myeloid Leukemia With Inv(16)(p13;q22)|Adult Acute Myeloid Leukemia With t(15;17)(q22;q12)|Adult Acute Myeloid Leukemia With t(16;16)(p13;q22)|Adult Acute Myeloid Leukemia With t(8;21)(q22;q22)|A…	Drug: Fludarabine|Drug: Busulfan|Radiation: Total Body Irradiation (TBI)|Biological: Donor Lymphocyte Infusion (DLI)|Drug: Cyclophosphamide (CY)|Drug: Tacrolimus|Drug: Mycophenolate mofetil|Device: Allogeneic hematopoietic stem cell transplantation|Procedure: Peripheral blood stem cell transplantation (PBSCT)	Sidney Kimmel Cancer Center at Thomas Jefferson University|Thomas Jefferson University		Interventional	https://ClinicalTrials.gov/show/NCT01384513
	Phase 2	Gemcitabine Hydrochloride With or Without Pazopanib Hydrochloride in Treating Patients With Refractory Soft Tissue Sarcoma	Adult Alveolar Soft Part Sarcoma|Adult Angiosarcoma|Adult Desmoplastic Small Round Cell Tumor|Adult Epithelioid Hemangioendothelioma|Adult Epithelioid Sarcoma|Adult Extraskeletal Myxoid Chondrosarcoma|Adult Extraskeletal Osteosarcoma|Adult Fibrosarcoma|Adult Leiomyosarcoma|Adult Liposarcoma|Adult Malignant Mesenchymoma|Adult Malignant Peripheral Nerve Sheath Tumor|Adult Rhabdomyosarcoma|Adult Syn…	Drug: Gemcitabine Hydrochloride|Other: Laboratory Biomarker Analysis|Drug: Pazopanib Hydrochloride|Other: Placebo	OHSU Knight Cancer Institute|National Cancer Institute (NCI)		Interventional	https://ClinicalTrials.gov/show/NCT01532687
	Phase 2	Efficacy of NF-kB Inhibition for Reducing Symptoms During Maintenance Therapy in Multiple Myeloma Patients	Multiple Myeloma	Drug: Curcumin|Other: Placebo	M.D. Anderson Cancer Center|National Institutes of Health (NIH)		Interventional	https://ClinicalTrials.gov/show/NCT01269203
	Phase 2	Chloroquine in Combination With VELCADE and Cyclophosphamide for Relapsed and Refractory Multiple Myeloma	Multiple Myeloma	Drug: Velcade|Drug: Cyclophosphamide|Drug: Chloroquine	New York University School of Medicine|Millennium Pharmaceuticals, Inc.		Interventional	https://ClinicalTrials.gov/show/NCT01438177
	Phase 2	Subcutaneous Velcade Plus Oral Melphalan and Prednisone or Plus Cycloposphamide and Prednisone or Plus Prednisone	Multiple Myeloma	Drug: velcade subcutaneous melphalan prednisone|Drug: velcade cyclophosphamide prednisone|Drug: velcade prednisone	Stichting Hemato-Oncologie voor Volwassenen Nederland|Fondazione Neoplasie Sangue Onlus		Interventional	https://ClinicalTrials.gov/show/NCT01190787
	Phase 2	Busulfan & Melphalan Conditioning for Autologous Stem Cell Transplant (ASCT) and Lenalidomide Maintenance	Multiple Myeloma	Drug: Busulfan|Drug: Melphalan|Drug: Lenalidomide	University Health Network, Toronto|Princess Margaret Hospital, Canada|Otsuka Pharmaceutical Development & Commercialization, Inc.|Celgene Corporation		Interventional	https://ClinicalTrials.gov/show/NCT01702831
	Phase 2	Open Label Study With Imetelstat to Determine Effect of Imetelstat in Patients w/ Previously Treated Multiple Myeloma	Multiple Myeloma	Drug: Imetelstat (7.5 mg/kg)|Drug: lenalidomide standard of care|Drug: Imetelstat (9.4 mg/kg)	Geron Corporation		Interventional	https://ClinicalTrials.gov/show/NCT01242930
	Phase 2	Phase II Randomised Trial of Cyclophosphamide and Dexamethasone in Combination With Ixazomib in Relapsed or Refractory Multiple Myeloma.	Multiple Myeloma	Drug: Ixazomib|Drug: Cyclophosphamide|Drug: Dexamethasone	University of Leeds|Myeloma UK|Millennium Pharmaceuticals, Inc.		Interventional	https://ClinicalTrials.gov/show/NCT02461888
	Phase 2	Phase 2 Study to Evaluate the Oral Combination of Ixazomib (MLN9708) With Cyclophosphamide and Dexamethasone in Patients With Newly Diagnosed or Relapsed and/or Refractory Multiple Myeloma	Multiple Myeloma	Drug: Cyclophosphamide|Drug: Ixazomib (MLN9708)|Drug: Dexamethasone	Millennium Pharmaceuticals, Inc.|Takeda		Interventional	https://ClinicalTrials.gov/show/NCT02046070
	Phase 2	Ixazomib, Lenalidomide, Dexamethasone Induction and Extended Consolidation Plus Lenalidomide Maintenance in Multiple Myeloma	Multiple Myeloma	Drug: Ixazomib|Drug: Lenalidomide|Drug: Dexamethasone	University Hospital, Toulouse|Takeda|Celgene		Interventional	https://ClinicalTrials.gov/show/NCT02897830
	Phase 2	UARK 2015-03 A Phase II Trial of a Novel Proteasome/IMiD Combination	Multiple Myeloma	Drug: Ixazomib|Drug: Pomalidomide|Drug: Dexamethasone	University of Arkansas		Interventional	https://ClinicalTrials.gov/show/NCT02578121
	Phase 2	Ixazomib in Combination With Thalidomide - Dexamethasone in Patients With Relapsed and/or Refractory Multiple Myeloma	Multiple Myeloma	Drug: Ixazomib|Drug: Thalidomide|Drug: Dexamethasone	Arbeitsgemeinschaft medikamentoese Tumortherapie		Interventional	https://ClinicalTrials.gov/show/NCT02410694
	Phase 2	Safety and Efficacy Study of a Triplet Combination of MLN9708, Lenalidomide and Dexamethasone in the Initial Management of Multiple Myeloma (IFM2013-06)	Newly Diagnosed Multiple Myeloma	Drug: MLN9708|Drug: Lenalidomide|Drug: Dexamethasone	Nantes University Hospital		Interventional	https://ClinicalTrials.gov/show/NCT01936532
	Phase 2	Pomalidomide in Relapsed and Refractory Multiple Myeloma (RRMM)	Multiple Myeloma	Drug: Pomalidomide|Drug: Dexamethasone|Drug: Cyclophosphamide	University of Leeds|Myeloma UK|Celgene		Interventional	https://ClinicalTrials.gov/show/NCT02406222
	Phase 2	High-Dose Weekly Carfilzomib Plus Cyclophosphamide and Dexamethasone in the Treatment of Relapsed Multiple Myeloma	Multiple Myeloma	Drug: Carfilzomib|Drug: Cyclophosphamide|Drug: Dexamethasone	Canadian Cancer Trials Group|Amgen|Myeloma Canada Research Network		Interventional	https://ClinicalTrials.gov/show/NCT02597062
	Phase 2	Study of Carfilzomib in Multiple Myeloma Relapsed After High-dose Melphalan With Autologous Stem Cell Support	Multiple Myeloma	Drug: Induction with CAR-CY-DEX and conditioning with carfilzomib and highdose melphalan|Drug: Carfilzomib/dexamethasone maintenance|Drug: Observation without carfilzomib/dexamethasone maintenance	Henrik Gregersen|Nordic Myeloma Study Group|Aalborg Universitetshospital		Interventional	https://ClinicalTrials.gov/show/NCT02572492
	Phase 2	Relapse Myeloma; Cyclofosfamide; Bortezomib; Maintenance	Multiple Myeloma	Drug: Bortezomib|Drug: Cyclophosphamide|Drug: Dexamethasone	University Medical Center Groningen		Interventional	https://ClinicalTrials.gov/show/NCT02467010
	Phase 2	Clarithromycin,Lenalidomide and Dexamethasone for Relapsed/Refractory Myeloma	Relapse/Refractory Multiple Myeloma	Drug: clarithromycin|Drug: Lenalidomide|Drug: Dexamethasone	Sun Yat-sen University|China Food and Drug Administration		Interventional	https://ClinicalTrials.gov/show/NCT02986451
	Phase 2	Pembrolizumab + Lenalidomide Post Autologous Stem Cell Transplant (ASCT) in High-risk Multiple Myeloma (MM)	Multiple Myeloma	Drug: Pembrolizumab|Drug: Lenalidomide|Drug: Dexamethasone	Hackensack University Medical Center		Interventional	https://ClinicalTrials.gov/show/NCT02906332
	Phase 2	A Phase II Trial If Nivolumab, Lenalidomide and Dexamethasone in High Risk Smoldering Myeloma	Smoldering Multiple Myeloma	Drug: Nivolumab|Drug: Lenalidomide|Drug: Dexamethasone	Dana-Farber Cancer Institute|Bristol-Myers Squibb|Multiple Myeloma Research Consortium		Interventional	https://ClinicalTrials.gov/show/NCT02903381
	Phase 2	Lenalidomide & Adriamycin & Dexamethasone (RAD) in Newly Diagnosed, Multiple Myeloma Patients	Multiple Myeloma	Drug: Lenalidomide|Drug: Adriamycin|Drug: Dexamethasone	Meletios A. Dimopoulos|University of Athens		Interventional	https://ClinicalTrials.gov/show/NCT02471820
	Phase 2	Bortezomib, Lenalidomide, and Dexamethasone in Treating Patients With Multiple Myeloma Undergoing Stem Cell Transplant	Refractory Plasma Cell Myeloma	Drug: Bortezomib|Drug: Lenalidomide|Drug: Dexamethasone	University of Colorado, Denver		Interventional	https://ClinicalTrials.gov/show/NCT02353468
	Phase 2	Trial of Combination of Elotuzumab Lenalidomide and Dexamethasone in High-Risk Smoldering Multiple Myeloma	Smoldering Myeloma|Smoldering Multiple Myeloma	Drug: Elotuzumab|Drug: Lenalidomide|Drug: Dexamethasone	Dana-Farber Cancer Institute|Bristol-Myers Squibb|Celgene		Interventional	https://ClinicalTrials.gov/show/NCT02279394
	Phase 2	Study of the Efficacy and Safety of RsqVD Combination Therapy for Patients With Newly Diagnosed Multiple Myeloma	Multiple Myeloma	Drug: lenalidomide|Drug: Subcutaneous bortezomib|Drug: Dexamethasone	Cancer Trials Ireland		Interventional	https://ClinicalTrials.gov/show/NCT02219178
	Phase 2	Study of Safety of Elotuzumab Administered Over Approximately 60 Minutes in Combination With Lenalidomide and Dexamethasone for Newly Diagnosed or Relapsed/Refractory Multiple Myeloma Patients	Multiple Myeloma	Drug: Elotuzumab|Drug: Lenalidomide|Drug: Dexamethasone	Bristol-Myers Squibb		Interventional	https://ClinicalTrials.gov/show/NCT02159365
	Phase 2	Response Adapted Therapy With Bortezomib/Dexamethasone Followed by Addition of Lenalidomide in Non Responders as Initial Treatment for Patients With Multiple Myeloma	Multiple Myeloma (MM)	Drug: Bortezomib|Drug: Dexamethasone|Drug: Lenalidomide	Memorial Sloan Kettering Cancer Center|Millennium Pharmaceuticals, Inc.|Hartford Hospital		Interventional	https://ClinicalTrials.gov/show/NCT01919086
	Phase 2	Lenalidomide/Bortezomib/Dexamethasone for Multiple Myeloma (MM)	Multiple Myeloma	Drug: Lenalidomide|Drug: Bortezomib|Drug: Dexamethasone	Massachusetts General Hospital		Interventional	https://ClinicalTrials.gov/show/NCT01782963
	Phase 2	Study of Decadron, Biaxin, and Pomalidomide in Relapsed/Refractory Myeloma	Multiple Myeloma	Drug: dexamethasone|Drug: clarithromycin|Drug: Pomalidomide	Weill Medical College of Cornell University|Celgene		Interventional	https://ClinicalTrials.gov/show/NCT01159574
	Phase 2	Bendamustine Hydrochloride, Bortezomib, and Dexamethasone in Treating Patients With Newly Diagnosed Multiple Myeloma	Stage I Multiple Myeloma|Stage II Multiple Myeloma|Stage III Multiple Myeloma	Drug: Bendamustine hydrochloride|Drug: Bortezomib|Drug: Dexamethasone	Sidney Kimmel Cancer Center at Thomas Jefferson University|Thomas Jefferson University		Interventional	https://ClinicalTrials.gov/show/NCT02224729
	Phase 2	Study to Evaluate the Combination of Bendamustine, Bortezomib and Dexamethasone (BBD) in the First-Line Treatment of Patients With Multiple Myeloma Who Are Not Candidates for High Dose Chemotherapy	Multiple Myeloma	Drug: Bendamustine|Drug: Bortezomib|Drug: Dexamethasone	SCRI Development Innovations, LLC|Millennium Pharmaceuticals, Inc.|Cephalon		Interventional	https://ClinicalTrials.gov/show/NCT01056276
	Phase 2	Trial of Plitidepsin (AplidinÂ®) in Combination With Bortezomib and Dexamethasone in Multiple Myeloma Patients Double Refractory to Bortezomib and Lenalidomide	Multiple Myeloma	Drug: plitidepsin|Drug: Bortezomib|Drug: Dexamethasone	PharmaMar		Interventional	https://ClinicalTrials.gov/show/NCT03117361
	Phase 2	Study of Ibrutinib in Combination With Bortezomib and Dexamethasone in Subjects With Relapsed/Relapsed and Refractory Multiple Myeloma	Multiple Myeloma	Drug: Ibrutinib|Drug: Bortezomib|Drug: Dexamethasone	Pharmacyclics LLC.|Janssen Research & Development, LLC		Interventional	https://ClinicalTrials.gov/show/NCT02902965
	Phase 2	Study of Venetoclax in Combination With Carfilzomib and Dexamethasone in Subjects With Relapsed or Refractory Multiple Myeloma (MM)	Relapsed or Refractory Multiple Myeloma	Drug: Venetoclax|Drug: Dexamethasone|Drug: Carfilzomib	AbbVie|Genentech, Inc.|Onyx Therapeutics, Inc.		Interventional	https://ClinicalTrials.gov/show/NCT02899052
	Phase 2	Panobinostat in Combination With Carfilzomib and Dexamethasone in Relapsed or Relapsed and Refractory Multiple Myeloma	Multiple Myeloma	Drug: panobinostat (capsules)|Drug: carfilzomib (infusion)|Drug: dexamethasone (tablets)	Novartis Pharmaceuticals|Novartis		Interventional	https://ClinicalTrials.gov/show/NCT02756663
	Phase 2	Panobinostat in Combination With Bortezomib and Dexamethasone in Japanese Patients With Relapsed/Refractory Multiple Myeloma	Relapse/Refractory Multiple Myeloma	Drug: LBH589 (panobinostat)|Drug: bortezomib|Drug: dexamethasone	Novartis Pharmaceuticals|Novartis		Interventional	https://ClinicalTrials.gov/show/NCT02290431
	Phase 2	SOM230 LAR With Bortezomib and Dexamethasone for Refractory or Relapsed Multiple Myeloma	Multiple Myeloma in Relapse|Multiple Myeloma	Drug: SOM230|Drug: Bortezomib|Drug: Dexamethasone	University of Pittsburgh|Novartis		Interventional	https://ClinicalTrials.gov/show/NCT01329289
	Phase 2	Paclitaxel,Cyclophosphamide and Dexamethasone for Relapsed or Refractory Multiple Myeloma	Relapse/Refractory Multiple Myeloma	Drug: Paclitaxel|Drug: Cyclophosphamide|Drug: Dexamethasone	Sun Yat-sen University		Interventional	https://ClinicalTrials.gov/show/NCT02985333
	Phase 2	Dasatinib in Combination With Melphalan and Prednisone to Treat Relapsed and Refractory Multiple Myeloma Patients	Myeloma	Drug: dasatinib|Drug: melphalan|Drug: prednisone	Fondazione Neoplasie Sangue Onlus		Interventional	https://ClinicalTrials.gov/show/NCT01116128
	Phase 2	Bendamustine, Bortezomib (Velcade Â®) and Prednisone (BVP) in Patients Newly Diagnosed Multiple Myeloma	Multiple Myeloma	Drug: Bendamustine|Drug: Velcade|Drug: Prednisone	PETHEMA Foundation|Mundipharma Pharmaceuticals B.V.|Janssen-Cilag Ltd.		Interventional	https://ClinicalTrials.gov/show/NCT01376401
	Phase 2	UARK 2013-05 A Study of Autologous Expanded Natural Killer Cell Therapy for Asymptomatic Multiple Myeloma	Asymptomatic Multiple Myeloma	Drug: ENK Cell Infusion	University of Arkansas|Millennium Pharmaceuticals, Inc.		Interventional	https://ClinicalTrials.gov/show/NCT01884688
	Phase 2	Study of SyB L-0501 to Treat Relapsed/Refractory Multiple Myeloma	Relapsed/Refractory Multiple Myeloma	Drug: SyB L-0501	SymBio Pharmaceuticals		Interventional	https://ClinicalTrials.gov/show/NCT01849848
	Phase 2	A Phase II Study of BI-505 in Smoldering Multiple Myeloma	Smoldering Multiple Myeloma	Drug: BI-505	BioInvent International AB		Interventional	https://ClinicalTrials.gov/show/NCT01838369
	Phase 2	Study of High Dose Carfilzomib in Multiple Myeloma Patients Who Have Progressed On Standard Dose Carfilzomib	Relapse Multiple Myeloma|Refractory Multiple Myeloma	Drug: Carfilzomib	Ajai Chari|Amgen|Icahn School of Medicine at Mount Sinai		Interventional	https://ClinicalTrials.gov/show/NCT01775553
	Phase 2	A Trial of TBL12 Sea Cucumber Extract in Patients With Untreated Asymptomatic Myeloma	Myeloma	Drug: TBL12	New York University School of Medicine|Unicorn Pacific Corporation		Interventional	https://ClinicalTrials.gov/show/NCT01302366
	Phase 2	A Phase II Trial of Anti-KIR in Smoldering Multiple Myeloma	Multiple Myeloma|Myeloma|Smoldering Multiple Myeloma	Drug: (Anti-KIR)	National Cancer Institute (NCI)|National Institutes of Health Clinical Center (CC)		Interventional	https://ClinicalTrials.gov/show/NCT01248455
	Phase 2	A Study of AT9283 in Patients With Relapsed or Refractory Multiple Myeloma	Multiple Myeloma	Drug: AT9283	NCIC Clinical Trials Group|Canadian Cancer Trials Group		Interventional	https://ClinicalTrials.gov/show/NCT01145989
	Phase 2	Exploratory Study on POL6326 in Stem Cell Mobilization	Multiple Myeloma	Drug: POL6326	Polyphor Ltd.		Interventional	https://ClinicalTrials.gov/show/NCT01105403
	Phase 2	Study of TBL 12 Sea Cucumber Extract for Patients With Untreated Asymptomatic Myeloma	Multiple Myeloma	Drug: TBL 12	Jagannath, Sundar, M.D.|Unicorn Pacific Corporation		Interventional	https://ClinicalTrials.gov/show/NCT01096810
	Phase 2	Safety and Efficacy of TKI258 in Relapsed or Refractory Multiple Myeloma Patients, Who Are With or Without t(4;14) Chromosomal Translocation	Relapsed or Refractory Multiple Myeloma	Drug: TKI258	Novartis Pharmaceuticals|Novartis		Interventional	https://ClinicalTrials.gov/show/NCT01058434
	Phase 2	Clarithromycin in Multiple Myeloma Induction Therapy	Multiple Myeloma	Drug: Clarithromycin|Drug: Placebo|Drug: VCD induction therapy	Henrik Gregersen|Danish Myeloma Study Group|Aalborg Universitetshospital		Interventional	https://ClinicalTrials.gov/show/NCT02573935
	Phase 2	HLA-Compatible Related or Unrelated Donors With CD34+ Enriched, T-cell Depleted Peripheral Blood Stem Cells Isolated by the CliniMACS System in the Treatment of Patients With Hematologic Malignancies	Acute Lymphoblastic Leukemia|Acute Myelogenous Leukemia|Myelodysplastic Syndrome|Multiple Myeloma	Radiation: total body irradiation|Drug: Thiotepa|Drug: Cyclophosphamide|Drug: Busulfan|Drug: Melphalan|Drug: Fludarabine|Drug: Clofarabine|Procedure: (CliniMACS) T-cell depleted PBSC Transplant	Memorial Sloan Kettering Cancer Center		Interventional	https://ClinicalTrials.gov/show/NCT01119066
	Phase 2	Paclitaxel Albumin-Stabilized Nanoparticle Formulation and Bevacizumab or Ipilimumab as First-Line Therapy in Treating Patients With Stage IV Melanoma That Cannot Be Removed by Surgery	Metastatic Melanoma|Mucosal Melanoma|Recurrent Melanoma|Stage IV Skin Melanoma|Stage IV Uveal Melanoma	Biological: Bevacizumab|Biological: Ipilimumab|Other: Laboratory Biomarker Analysis|Drug: Paclitaxel Albumin-Stabilized Nanoparticle Formulation|Other: Pharmacological Study	Academic and Community Cancer Research United|National Cancer Institute (NCI)		Interventional	https://ClinicalTrials.gov/show/NCT02158520
	Phase 2	Study of Vorinostat With Doxil and Bortezomib for Patients With Relapsed/Refractory Multiple Myeloma	Multiple Myeloma	Drug: Vorinostat|Drug: Bortezomib|Drug: pegylated liposomal doxorubicin	UNC Lineberger Comprehensive Cancer Center|Merck Sharp & Dohme Corp.		Interventional	https://ClinicalTrials.gov/show/NCT01492881
	Phase 2	Vinorelbine and Gemcitabine in Myeloma	Multiple Myeloma|Amyloidosis	Drug: Vinorelbine|Drug: Gemcitabine	University Hospital Inselspital, Berne		Interventional	https://ClinicalTrials.gov/show/NCT02791373
	Phase 2	A Study of Axitinib in Patients With Advanced Angiosarcoma and Other Soft Tissue Sarcomas	Soft Tissue Sarcoma	Drug: Axitinib	Sheffield Teaching Hospitals NHS Foundation Trust|University of Birmingham|Cancer Research UK|Pfizer		Interventional	https://ClinicalTrials.gov/show/NCT01140737
	Phase 2	Phase II Study of Concomitant Intensity-modulated Radiotherapy Combined to Capecitabine, Mitomycin and Panitumumab in Patients With Stage II-IIIB Squamous-cell Carcinoma of the Anal Canal	Carcinoma of Anal Canal	Radiation: RADIOTHERAPY|Biological: PANITUMUMAB|Drug: MITOMYCIN|Drug: CAPECITABINE	Centre Hospitalier Universitaire Vaudois		Interventional	https://ClinicalTrials.gov/show/NCT01843452
	Phase 2	Reduced-Intensity Conditioning Before Donor Stem Cell Transplant in Treating Patients With High-Risk Hematologic Malignancies	Accelerated Phase Chronic Myelogenous Leukemia|Adult Acute Lymphoblastic Leukemia in Remission|Adult Acute Myeloid Leukemia With 11q23 (MLL) Abnormalities|Adult Acute Myeloid Leukemia With Del(5q)|Adult Nasal Type Extranodal NK/T-cell Lymphoma|Anaplastic Large Cell Lymphoma|Angioimmunoblastic T-cell Lymphoma|Blastic Phase Chronic Myelogenous Leukemia|Childhood Acute Lymphoblastic Leukemia in Remi…	Drug: Fludarabine phosphate|Drug: Thiotepa|Radiation: Total body irradiation|Biological: Therapeutic allogeneic lymphocytes|Drug: Cyclophosphamide|Procedure: Allogeneic hematopoietic stem cell transplantation (HSCT)|Procedure: Peripheral blood stem cell transplantation|Drug: Tacrolimus|Drug: Mycophenolate mofetil	Sidney Kimmel Cancer Center at Thomas Jefferson University|Thomas Jefferson University		Interventional	https://ClinicalTrials.gov/show/NCT01760655
	Phase 2	Carfilzomib in Treating Patients With Multiple Myeloma in First Relapse or Refractory to First-Line Therapy	Refractory Multiple Myeloma	Drug: carfilzomib|Drug: dexamethasone|Other: laboratory biomarker analysis	Attaya Suvannasankha|National Cancer Institute (NCI)|Indiana University		Interventional	https://ClinicalTrials.gov/show/NCT02020941
	Phase 2	S1304, Carfilzomib and Dexamethasone for Treating Patients With Relapsed or Refractory Myeloma	Recurrent Plasma Cell Myeloma|Refractory Plasma Cell Myeloma	Drug: Carfilzomib|Drug: Dexamethasone|Other: Laboratory Biomarker Analysis	Southwest Oncology Group|National Cancer Institute (NCI)		Interventional	https://ClinicalTrials.gov/show/NCT01903811
	Phase 2	Carfilzomib and Dexamethasone in Treating Patients With Multiple Myeloma Who Previously Underwent a Stem Cell Transplant	Refractory Multiple Myeloma|Stage I Multiple Myeloma|Stage II Multiple Myeloma|Stage III Multiple Myeloma	Drug: carfilzomib|Drug: dexamethasone|Other: laboratory biomarker analysis	Mayo Clinic|National Cancer Institute (NCI)		Interventional	https://ClinicalTrials.gov/show/NCT01812720
	Phase 2	Collection of Transplant Stem Cells for Plasma Cell Myeloma	Plasma Cell Myeloma|Multiple Myeloma	Drug: Filgrastim|Drug: Plerixafor|Procedure: Apheresis	National Cancer Institute (NCI)|National Institutes of Health Clinical Center (CC)		Interventional	https://ClinicalTrials.gov/show/NCT01547806
	Phase 2	Alternating Ixazomib Citrate and Lenalidomide as Maintenance Therapy After Stem Cell Transplant in Treating Patients With Multiple Myeloma	Plasma Cell Myeloma|Transplant-Related Carcinoma	Drug: Ixazomib Citrate|Other: Laboratory Biomarker Analysis|Drug: Lenalidomide	Fred Hutchinson Cancer Research Center|National Cancer Institute (NCI)		Interventional	https://ClinicalTrials.gov/show/NCT02619682
	Phase 2	A Study of Granix to Disrupt the Bone Marrow Microenvironment in Patients With Multiple Myeloma Undergoing Autologous Transplantation	Multiple Myeloma	Drug: Granix|Drug: High dose melphalan (HDR)|Procedure: Autologous Stem Cell Transplant (ASCT)	Washington University School of Medicine		Interventional	https://ClinicalTrials.gov/show/NCT02112045
	Phase 2	Pooled Unrelated Donor Umbilical Cord Blood Transplant For Hematologic Malignancy Needing Allogeneic Stem Cell Transplant Without Related HLA-Match	Acute Myelogenous Leukemia|Acute Lymphocytic Leukemia|Chronic Lymphocytic Leukemia|Chronic Myelogenous Leukemia|Hodgkins Disease|Non-Hodgkins Lymphoma|Aplastic Anemia|Multiple Myeloma|Myelodysplastic Syndrome	Drug: Busulfan|Drug: Clofarabine|Drug: Fludarabine|Drug: Melphalan|Drug: Carmustine|Drug: Etoposide|Drug: Cytarabine	Texas Oncology Cancer Center		Interventional	https://ClinicalTrials.gov/show/NCT01500161
	Phase 2	Sonidegib and Lenalidomide After Stem Cell Transplant in Treating Patients With Multiple Myeloma	Recurrent Plasma Cell Myeloma|Refractory Plasma Cell Myeloma	Other: Laboratory Biomarker Analysis|Drug: Lenalidomide|Drug: Sonidegib	Mayo Clinic|National Cancer Institute (NCI)|Novartis Pharmaceuticals		Interventional	https://ClinicalTrials.gov/show/NCT02086552
	Phase 2	Allogeneic Hematopoietic Stem Cell Transplantation With Ixazomib for High Risk Multiple Myeloma (BMT CTN 1302)	Multiple Myeloma	Procedure: Allogeneic HSCT|Drug: Fludarabine|Drug: Melphalan|Drug: Bortezomib|Drug: Ixazomib|Drug: Placebo	National Heart, Lung, and Blood Institute (NHLBI)|Blood and Marrow Transplant Clinical Trials Network|National Cancer Institute (NCI)|National Marrow Donor Program		Interventional	https://ClinicalTrials.gov/show/NCT02440464
	Phase 2	Phase II Study of IRD (Ixazomib, Lenalidomide, Dexamethasone) Post Autologous Stem Cell Transplantation Followed by Maintenance Ixazomib or Lenalidomide for Multiple Myeloma	Multiple Myeloma	Biological: Ixazomib|Drug: Lenalidomide|Drug: Dexamethasone	Washington University School of Medicine|Millennium Pharmaceuticals, Inc.		Interventional	https://ClinicalTrials.gov/show/NCT02253316
	Phase 2	Paclitaxel Albumin-Stabilized Nanoparticle Formulation in Treating Patients With Relapsed or Refractory Multiple Myeloma	Refractory Plasma Cell Myeloma	Drug: Paclitaxel Albumin-Stabilized Nanoparticle Formulation|Other: Laboratory Biomarker Analysis	Mayo Clinic|National Cancer Institute (NCI)		Interventional	https://ClinicalTrials.gov/show/NCT01646762
	Phase 2	Tadalafil and Lenalidomide Maintenance With or Without Activated Marrow Infiltrating Lymphocytes (MILs) in High Risk Myeloma	Multiple Myeloma	Biological: aMIL|Drug: No aMIL	Sidney Kimmel Comprehensive Cancer Center|The Leukemia and Lymphoma Society		Interventional	https://ClinicalTrials.gov/show/NCT01858558
	Phase 2	RIC Transplant Using Haplo Donors	Chronic Myelogenous Leukemia|Acute Myelogenous Leukemia|Myelodysplastic Syndrome|Acute Lymphocytic Leukemia|Chronic Lymphocytic Leukemia|Hodgkin's Lymphoma|Non-Hodgkin's Lymphoma|Myelofibrosis|CMML|Multiple Myeloma	Drug: Fludarabine|Drug: Melphalan|Drug: Cyclophosphamide|Procedure: peripheral blood stem cell transplant	Northside Hospital, Inc.|Blood and Marrow Transplant Group of Georgia		Interventional	https://ClinicalTrials.gov/show/NCT02581007
	Phase 2	Carfilzomib/Cyclophosphamide/Dexamethasone With Maintenance Carfilzomib in Multiple Myeloma	Multiple Myeloma	Procedure: Autologous Stem Cell Transplant (ASCT)|Drug: Consolidation with 4 cycles of CarCyDex	University College, London|Amgen		Interventional	https://ClinicalTrials.gov/show/NCT02315716
	Phase 2	Patients With Newly Diagnosed Multiple Myeloma Comparing KTd vs. KRd Induction Therapy and Investigating a K-mono Maintenance Strategy	Multiple Myeloma	Drug: Carfilzomib|Drug: Thalidomide|Drug: Lenalidomide|Drug: Dexamethasone	Arbeitsgemeinschaft medikamentoese Tumortherapie|Amgen		Interventional	https://ClinicalTrials.gov/show/NCT02891811
	Phase 2	UCB Transplant for Hematological Diseases Using a Non Myeloablative Prep	Acute Leukemia|Acute Myeloid Leukemia|Acute Lymphoblastic Leukemia/Lymphoma|Burkitt's Lymphoma|Natural Killer Cell Malignancies|Chronic Myelogenous Leukemia|Myelodysplastic Syndrome|Large-cell Lymphoma|Hodgkin Lymphoma|Multiple Myeloma|Relapsed Chronic Lymphocytic Leukemia|Small Lymphocytic Lymphoma|Marginal Zone B-cell Lymphoma|Follicular Lymphoma|Lymphoplasmacytic Lymphoma|Mantle-cell Lymphoma|…	Drug: Fludarabine|Drug: Cyclophosphamide|Drug: MMF|Drug: Sirolimus|Radiation: TBI|Biological: Umbilical cord blood cell infusion|Biological: ATG	Masonic Cancer Center, University of Minnesota		Interventional	https://ClinicalTrials.gov/show/NCT02722668
	Phase 2	Study of Bortezomib and Dexamethasone With or Without Elotuzumab to Treat Relapsed or Refractory Multiple Myeloma	Multiple Myeloma	Biological: Elotuzumab|Drug: Bortezomib|Drug: Dexamethasone|Drug: Dexamethasone|Drug: Dexamethasone|Drug: Dexamethasone	Bristol-Myers Squibb|AbbVie		Interventional	https://ClinicalTrials.gov/show/NCT01478048
	Phase 2	Elotuzumab, Pomalidomide, & Dexamethasone (Elo-Pom-Dex) With Second Autologous Stem Cell Transplantation for Relapsed Multiple Myeloma	Multiple Myeloma in Relapse	Drug: Elotuzumab|Drug: Pomalidomide|Drug: Dexamethasone|Procedure: Autologous stem cell transplant|Drug: Melphalan	Washington University School of Medicine|Bristol-Myers Squibb|Celgene		Interventional	https://ClinicalTrials.gov/show/NCT03030261
	Phase 2	UARK 2014-21 A Phase II Trial of Oncolytic Virotherapy by Systemic Administration of Edmonston Strain of Measles Virus	Multiple Myeloma	Drug: MV-NIS	University of Arkansas		Interventional	https://ClinicalTrials.gov/show/NCT02192775
	Phase 2	Daratumumab, Thalidomide and Dexamethasone in Relapse and/or Refractory Myeloma	Relapse and / or Refractory Myeloma	Drug: Daratumumab, thalidomide and dexamethasone	National University Hospital, Singapore|Janssen, LP|International Myeloma Foundation (IMF)		Interventional	https://ClinicalTrials.gov/show/NCT03143036
	Phase 2	Efficacy and Toxicity Study of Pomalidomide and Dexamethasone in Patients Who Have Relapsed After Exposure to Lenalidomide and Bortezomib	Multiple Myeloma|Relapse After Use of Lenalidomide and Bortezomib	Drug: Pomalidomide and Dexamethasone	National University Hospital, Singapore|Celgene		Interventional	https://ClinicalTrials.gov/show/NCT02158702
	Phase 2	Efficacy and Safety of Pomalidomide and Dexamethasone in RRMM Patients With Renal Insufficiency	Multiple Myeloma	Drug: Pomalidomide and Dexamethasone	Celgene Corporation		Interventional	https://ClinicalTrials.gov/show/NCT02045017
	Phase 2	Lenalidomide & High Dose Dexamethasone for Untreated Multiple Myeloma Renal Failure Patients	Renal Failure|Multiple Myeloma	Drug: Lenalidomide and Dexamethasone	University Health Network, Toronto		Interventional	https://ClinicalTrials.gov/show/NCT01270932
	Phase 2	Efficacy of Monosialotetrahexosylganglioside in the Prophylactic Treatment of Bortezomib-induced Peripheral Neuropathy	Multiple Myeloma	Drug: Monosialotetrahexosylganglioside	Sun Yat-sen University		Interventional	https://ClinicalTrials.gov/show/NCT02093910
	Phase 2	Study of Induction Treatment With Velcade and Dexamethasone for Previously Untreated Patients With Multiple Myeloma and Renal Failure	Multiple Myeloma	Drug: velcade	PETHEMA Foundation		Interventional	https://ClinicalTrials.gov/show/NCT01084837
	Phase 2	Effects of Selexipag in Adults With Raynaud's Phenomenon Secondary to Systemic Sclerosis	Raynaud's Phenomenon Secondary to Systemic Sclerosis	Drug: Selexipag|Drug: Placebo	Actelion		Interventional	https://ClinicalTrials.gov/show/NCT02260557
	Phase 2	Study in Patients With Untreated Multiple Myeloma and Renal Insufficiency	Multiple Myeloma|Renal Insufficiency	Drug: BHQ880|Drug: BHQ990	Novartis Pharmaceuticals|Novartis		Interventional	https://ClinicalTrials.gov/show/NCT01337752
	Phase 2	Vorinostat, Tacrolimus, and Methotrexate in Preventing GVHD After Stem Cell Transplant in Patients With Hematological Malignancies	Accelerated Phase Chronic Myelogenous Leukemia|Adult Acute Myeloid Leukemia in Remission|Adult Acute Myeloid Leukemia With 11q23 (MLL) Abnormalities|Adult Acute Myeloid Leukemia With Del(5q)|Adult Acute Myeloid Leukemia With Inv(16)(p13;q22)|Adult Acute Myeloid Leukemia With t(15;17)(q22;q12)|Adult Acute Myeloid Leukemia With t(16;16)(p13;q22)|Adult Acute Myeloid Leukemia With t(8;21)(q22;q22)|Ad…	Drug: vorinostat|Drug: tacrolimus|Drug: cyclosporine|Drug: methotrexate|Other: laboratory biomarker analysis|Other: pharmacological study	National Cancer Institute (NCI)		Interventional	https://ClinicalTrials.gov/show/NCT01789255
	Phase 2	Donor Stem Cell Transplant in Treating Patients With Relapsed Hematologic Malignancies or Secondary Myelodysplasia Previously Treated With High-Dose Chemotherapy and Autologous Stem Cell Transplant	Leukemia|Lymphoma|Lymphoproliferative Disorder|Multiple Myeloma and Plasma Cell Neoplasm|Myelodysplastic Syndromes|Myelodysplastic/Myeloproliferative Neoplasms	Biological: anti-thymocyte globulin|Biological: donor lymphocytes|Biological: filgrastim|Biological: therapeutic allogeneic lymphocytes|Drug: busulfan|Drug: fludarabine phosphate|Drug: methotrexate|Drug: mycophenolate mofetil|Drug: tacrolimus|Other: reduced-intensity transplant conditioning procedure|Procedure: allogeneic hematopoietic stem cell transplantation|Procedure: peripheral blood stem ce…	Alliance for Clinical Trials in Oncology|National Cancer Institute (NCI)		Interventional	https://ClinicalTrials.gov/show/NCT01118013
	Phase 2	Bone Marrow Transplantation of Patients in Remission Using Partially Matched Relative Donor	Acute Myeloid Leukemia|Myelodysplastic Syndromes|Biphenotypic Leukemia|Acute Lymphocytic Leukemia|Chronic Myeloid Leukemia|Chronic Lymphocytic Leukemia|Plasma Cell Neoplasms|Lymphoma|Hodgkin's Disease|Aplastic Anemia	Radiation: Total Body Irradiation (TBI)|Biological: Donor Lymphocyte Infusion (DLI)|Drug: Cyclophosphamide|Drug: Mycophenolate Mofetil (MMF)|Drug: Tacrolimus|Device: Hematopoietic stem cell transplantation (HSCT)	Sidney Kimmel Cancer Center at Thomas Jefferson University|Thomas Jefferson University		Interventional	https://ClinicalTrials.gov/show/NCT01350245
	Phase 2	Activity Study of Bevacizumab With Temozolomide Â± Irinotecan for Neuroblastoma in Children	Neuroblastoma	Drug: Bevacizumab|Drug: Temozolomide|Drug: Temozolomide|Drug: Irinotecan|Drug: Bevacizumab|Drug: Topotecan|Drug: Temozolomide	University of Birmingham|Cancer Research UK|Roche Pharma AG		Interventional	https://ClinicalTrials.gov/show/NCT02308527
	Phase 2	Cyclophosphamide With Biochemical Progression During Lenalidomide-Dexamethasone Treatment for Relapsed/Refractory Multiple Myeloma (MM)	Multiple Myeloma	Drug: Cyclophosphamide|Drug: Lenalidomide|Drug: Dexamethasone	Fondazione Neoplasie Sangue Onlus		Interventional	https://ClinicalTrials.gov/show/NCT02206503
	Phase 2	Daratumumab in Combination With Bortezomib and Dexamethasone in Subjects With Relapsed or Relapsed and Refractory Multiple Myeloma and Severe Renal Impairment	Multiple Myeloma	Drug: Daratumumab|Drug: Bortezomib|Drug: Dexamethasone	University Hospital Tuebingen		Interventional	https://ClinicalTrials.gov/show/NCT02977494
	Phase 2	PAV-trial: Plerixafor and Chemotherapy With Vinorelbine for Stem Cell Mobilization in Patients With Myeloma	Myeloma	Drug: Vinorelbine, G-CSF, & Plerixafor|Drug: Vinorelbine and Plerixafor|Drug: G-CSF and Plerixafor|Drug: Vinorelbine & Plerixafor on day when CD34 count is at least 15'000 CD34+ cells/ml of peripheral blood	University Hospital Inselspital, Berne		Interventional	https://ClinicalTrials.gov/show/NCT01220375
	Phase 2	Evaluation of the Safety and the Efficacy of Carfilzomib Combined With Cyclophosphamide and Dexamethasone (CCyd) or Lenalidomide and Dex (CRd) Followed by ASCT or 12 Cycles of Carf Combined With Dex and Len for Patients Eligible for ASCT With Newly Diagnosed Multiple Myeloma.	MULTIPLE MYELOMA (MM)	Drug: Carfilzomib|Drug: Cyclophosphamide|Drug: Lenalidomide|Drug: Dexamethasone	Silvio Aime|University of Turin, Italy		Interventional	https://ClinicalTrials.gov/show/NCT02203643
	Phase 2	Carfilzomib in Treatment Patients Under 65 Years With High Risk Smoldering Multiple Myeloma	Smoldering Multiple Myeloma	Drug: carfilzomib|Drug: Lenalidomide|Drug: Dexamethasone|Drug: Melphalan	PETHEMA Foundation|Celgene Corporation|Amgen		Interventional	https://ClinicalTrials.gov/show/NCT02415413
	Phase 2	A Study to Evaluate Dara-CyBorD in Previously Untreated and Relapsed Subjects With Multiple Myeloma	Multiple Myeloma	Drug: Daratumumab|Drug: Cyclophosphamide|Drug: Bortezomib|Drug: Dexamethasone	Janssen Scientific Affairs, LLC		Interventional	https://ClinicalTrials.gov/show/NCT02951819
	Phase 2	Combination of G-CSF, Bortezomib, Cyclophosphamide and Dexamethasone in Patients With Multiple Myeloma	Myeloma|Bortezomib|Cyclophosphamide|Dexamethasone|Granulocyte Colony-Stimulating Factor	Drug: G-CSF|Drug: Bortezomib|Drug: Cyclophosphamide|Drug: Dexamethasone	Second Affiliated Hospital of Soochow University		Interventional	https://ClinicalTrials.gov/show/NCT02027220
	Phase 2	Bortezomib, Liposomal Doxorubicin Hydrochloride, Dexamethasone, and Cyclophosphamide in Treating Patients With Multiple Myeloma That Relapsed After Autologous Stem Cell Transplant	Refractory Multiple Myeloma	Drug: liposomal doxorubicin|Drug: bortezomib|Drug: dexamethasone|Drug: cyclophosphamide	National Cancer Institute (NCI)		Interventional	https://ClinicalTrials.gov/show/NCT01078441
	Phase 2	Evaluation iNduction, Consolidation and Maintenance Treatment With Isatuximab , Carfilzomib, LEnalidomide and Dexamethasone	Multiple Myeloma	Drug: Isatuximab|Drug: Carfilzomib|Drug: Lenalidomide|Drug: Dexamethasone	University Hospital Tuebingen		Interventional	https://ClinicalTrials.gov/show/NCT03104842
	Phase 2	Combination Study for High Risk Multiple Myeloma Patients	Multiple Myeloma	Drug: Elotuzumab|Drug: Pomalidomide|Drug: Carfilzomib|Drug: Dexamethasone	Oncotherapeutics		Interventional	https://ClinicalTrials.gov/show/NCT03104270
	Phase 2	2015-09: A Phase II Randomized, Open-label Study of Anti-signaling Lymphocytic Activation Molecule Monoclonal Antibody During Maintenance Therapy	Multiple Myeloma	Drug: Elotuzumab|Drug: Bortezomib|Drug: Lenalidomide|Drug: Dexamethasone	University of Arkansas		Interventional	https://ClinicalTrials.gov/show/NCT03000634
	Phase 2	Study of Initial Treatment With Elotuzumab, Carfilzomib, Lenalidomide and Dexamethasone in Multiple Myeloma	Multiple Myeloma	Drug: Elotuzumab|Drug: Carfilzomib|Drug: Lenalidomide|Drug: Dexamethasone	University of Chicago|Bristol-Myers Squibb|Amgen		Interventional	https://ClinicalTrials.gov/show/NCT02969837
	Phase 2	Study Comparing Daratumumab, Lenalidomide, Bortezomib, and Dexamethasone (D-RVd) Versus Lenalidomide, Bortezomib, and Dexamethasone (RVd) in Subjects With Newly Diagnosed Multiple Myeloma	Multiple Myeloma	Drug: Lenalidomide|Drug: Bortezomib|Drug: Dexamethasone|Drug: Daratumumab	Janssen Research & Development, LLC		Interventional	https://ClinicalTrials.gov/show/NCT02874742
	Phase 2	A Study of Elotuzumab With Pomalidomide, Bortezomib, and Dexamethasone in Relapsed Multiple Myeloma	Multiple Myeloma	Drug: Elotuzumab|Drug: Pomalidomide|Drug: Bortezomib|Drug: Dexamethasone	Massachusetts General Hospital|Celgene|Bristol-Myers Squibb|Multiple Myeloma Research Consortium		Interventional	https://ClinicalTrials.gov/show/NCT02718833
	Phase 2	A Study of Elotuzumab in Combination With Pomalidomide and Low Dose Dexamethasone and Elotuzumab in Combination With Nivolumab in Patients With Multiple Myeloma Relapsed or Refractory to Prior Treatment With Lenalidomide.	Multiple Myeloma	Drug: Elotuzumab|Drug: Pomalidomide|Drug: Dexamethasone|Drug: Nivolumab	Bristol-Myers Squibb		Interventional	https://ClinicalTrials.gov/show/NCT02612779
	Phase 2	Daratumumab in Combination With Lenalidomide and Dexamethasone in Relapsed and Relapsed-refractory Multiple Myeloma	Multiple Myeloma	Drug: Part 1 (Dose Escalation): Daratumumab|Drug: Part 2 (Dose Expansion): Daratumumab|Drug: Lenalidomide|Drug: Dexamethasone	Janssen Research & Development, LLC		Interventional	https://ClinicalTrials.gov/show/NCT01615029
	Phase 2	Dinaciclib in Treating Patients With Relapsed or Refractory Multiple Myeloma	Refractory Multiple Myeloma	Drug: dinaciclib|Other: laboratory biomarker analysis	National Cancer Institute (NCI)		Interventional	https://ClinicalTrials.gov/show/NCT01096342
	Phase 2	A Study to Determine the Safety and Efficacy for the Combination of Durvalumab and Daratumumab in Relapsed and Refractory Multiple Myeloma	Multiple Myeloma	Drug: Daratumumab|Drug: Durvalumab|Drug: Pomalidomide|Drug: Dexamethasone	Celgene		Interventional	https://ClinicalTrials.gov/show/NCT02807454
	Phase 2	Eltrombopag for Thrombocytopenia in Patients With Relapsed Multiple Myeloma	Thrombocytopenia|Multiple Myeloma	Drug: Eltrombopag	Dana-Farber Cancer Institute		Interventional	https://ClinicalTrials.gov/show/NCT01484314
	Phase 2	AZD6244 (Selumetinib) in Treating Patients With Multiple Myeloma	Recurrent Plasma Cell Myeloma|Refractory Plasma Cell Myeloma	Other: Laboratory Biomarker Analysis|Drug: Selumetinib	National Cancer Institute (NCI)		Interventional	https://ClinicalTrials.gov/show/NCT01085214
	Phase 2	Ixazomib in Treating Patients With Relapsed Multiple Myeloma That Is Not Refractory to Bortezomib	Recurrent Plasma Cell Myeloma|Refractory Plasma Cell Myeloma	Drug: Cyclophosphamide|Drug: Dexamethasone|Drug: Ixazomib Citrate|Other: Laboratory Biomarker Analysis	Mayo Clinic|National Cancer Institute (NCI)		Interventional	https://ClinicalTrials.gov/show/NCT01415882
	Phase 2	Dalteparin, Lenalidomide, and Low-Dose Dexamethasone in Treating Patients With Previously Untreated Multiple Myeloma	Stage I Multiple Myeloma|Stage II Multiple Myeloma|Stage III Multiple Myeloma	Drug: dalteparin|Drug: lenalidomide|Drug: dexamethasone|Other: laboratory biomarker analysis	University of Southern California|National Cancer Institute (NCI)|Celgene Corporation		Interventional	https://ClinicalTrials.gov/show/NCT01518465
	Phase 2	A Study of Tabalumab in Participants With Previously Treated Multiple Myeloma (MM)	Multiple Myeloma	Drug: Placebo|Drug: Dexamethasone|Drug: Bortezomib|Biological: Tabalumab	Eli Lilly and Company		Interventional	https://ClinicalTrials.gov/show/NCT01602224
	Phase 2	Autologous Stem Cell Transplant With Pomalidomide (CC-4047Â®) Maintenance Versus Continuous Clarithromycin/ Pomalidomide / Dexamethasone Salvage Therapy in Relapsed or Refractory Multiple Myeloma	Multiple Myeloma	Drug: Pomalidomide|Procedure: stem cell|Drug: Dexamethasone|Drug: Clarithromycin	Memorial Sloan Kettering Cancer Center|Celgene Corporation|Weill Medical College of Cornell University|North Shore University Hospital|Rutgers Cancer Institute of New Jersey|State University of New York - Upstate Medical University		Interventional	https://ClinicalTrials.gov/show/NCT01745588
	Phase 2	Evaluation of Tc 99m Tilmanocept Localization in Primary Cutaneous Kaposi's Sarcoma and Lymphatic Drainage by SPECT/CT	Kaposi's Sarcoma	Drug: Tc 99m tilmanocept	Navidea Biopharmaceuticals		Interventional	https://ClinicalTrials.gov/show/NCT02201420
	Phase 2	Phase 2 Multi-center Study of Anti-PD-1 During Lymphopenic State After HDT/ASCT for Multiple Myeloma	Multiple Myeloma	Procedure: Autologous Stem Cell Transplant|Drug: Melphalan|Drug: Lenalidomide|Drug: MK-3475	University of Michigan Cancer Center|Medical College of Wisconsin		Interventional	https://ClinicalTrials.gov/show/NCT02331368
	Phase 2	Sirolimus, Cyclosporine, and Mycophenolate Mofetil in Preventing Graft-versus-Host Disease in Treating Patients With Hematologic Malignancies Undergoing Donor Peripheral Blood Stem Cell Transplant	Adult Acute Lymphoblastic Leukemia|Adult Acute Myeloid Leukemia|Adult Diffuse Large B-Cell Lymphoma|Adult Myelodysplastic Syndrome|Adult Non-Hodgkin Lymphoma|Aggressive Non-Hodgkin Lymphoma|Childhood Acute Lymphoblastic Leukemia|Childhood Acute Myeloid Leukemia|Childhood Diffuse Large B -Cell Lymphoma|Childhood Myelodysplastic Syndrome|Childhood Non-Hodgkin Lymphoma|Chronic Lymphocytic Leukemia|C…	Procedure: Allogeneic Hematopoietic Stem Cell Transplantation|Drug: Cyclosporine|Drug: Fludarabine Phosphate|Other: Laboratory Biomarker Analysis|Drug: Mycophenolate Mofetil|Procedure: Peripheral Blood Stem Cell Transplantation|Drug: Sirolimus|Radiation: Total-Body Irradiation	Fred Hutchinson Cancer Research Center|National Cancer Institute (NCI)		Interventional	https://ClinicalTrials.gov/show/NCT01251575
	Phase 2	Single or Double Donor Umbilical Cord Blood Transplant in Treating Patients With High-Risk Hematologic Malignancies	Accelerated Phase Chronic Myelogenous Leukemia|Acute Myeloid Leukemia With Multilineage Dysplasia Following Myelodysplastic Syndrome|Adult Acute Lymphoblastic Leukemia in Remission|Adult Acute Myeloid Leukemia in Remission|Adult Acute Myeloid Leukemia With 11q23 (MLL) Abnormalities|Adult Acute Myeloid Leukemia With Inv(16)(p13;q22)|Adult Acute Myeloid Leukemia With t(15;17)(q22;q12)|Adult Acute M…	Drug: cyclophosphamide|Drug: fludarabine phosphate|Drug: mycophenolate mofetil|Procedure: allogeneic hematopoietic stem cell transplantation|Procedure: umbilical cord blood transplantation|Procedure: double-unit umbilical cord blood transplantation|Radiation: total-body irradiation|Drug: tacrolimus|Procedure: allogeneic hematopoietic stem cell transplantation|Procedure: peripheral blood stem cell…	University of Medicine and Dentistry of New Jersey|National Cancer Institute (NCI)|Rutgers, The State University of New Jersey		Interventional	https://ClinicalTrials.gov/show/NCT01652014
	Phase 2	Ixazomib Rollover Study	Multiple Myeloma|Lymphoma|Amyloidosis	Drug: Ixazomib	Millennium Pharmaceuticals, Inc.|Takeda		Interventional	https://ClinicalTrials.gov/show/NCT02924272
	Phase 2	Fludarabine Phosphate, Melphalan, and Low-Dose Total-Body Irradiation Followed by Donor Peripheral Blood Stem Cell Transplant in Treating Patients With Hematologic Malignancies	Accelerated Phase Chronic Myelogenous Leukemia|Adult Acute Lymphoblastic Leukemia in Remission|Adult Acute Myeloid Leukemia in Remission|Adult Acute Myeloid Leukemia With 11q23 (MLL) Abnormalities|Adult Acute Myeloid Leukemia With Del(5q)|Adult Acute Myeloid Leukemia With Inv(16)(p13;q22)|Adult Acute Myeloid Leukemia With t(15;17)(q22;q12)|Adult Acute Myeloid Leukemia With t(16;16)(p13;q22)|Adult…	Drug: fludarabine phosphate|Drug: melphalan|Radiation: total-body irradiation|Drug: tacrolimus|Drug: mycophenolate mofetil|Drug: methotrexate|Other: laboratory biomarker analysis|Procedure: allogeneic hematopoietic stem cell transplantation|Procedure: peripheral blood stem cell transplantation	Roswell Park Cancer Institute		Interventional	https://ClinicalTrials.gov/show/NCT01529827
	Phase 2	A Phase II Trial Using Meloxicam Plus Filgrastim in Patients With Multiple Myeloma and Non-Hodgkin's Lymphoma	Multiple Myeloma|Non-Hodgkin's Lymphoma	Drug: Meloxicam|Drug: Filgrastim	Sherif S. Farag|National Cancer Institute (NCI)|Indiana University		Interventional	https://ClinicalTrials.gov/show/NCT02078102
	Phase 2	Trametinib and Akt Inhibitor GSK2141795 in Treating Patients With Relapsed or Refractory Multiple Myeloma	Recurrent Plasma Cell Myeloma|Refractory Plasma Cell Myeloma	Drug: Akt Inhibitor GSK2141795|Other: Laboratory Biomarker Analysis|Other: Pharmacological Study|Drug: Trametinib	National Cancer Institute (NCI)		Interventional	https://ClinicalTrials.gov/show/NCT01989598
	Phase 2	Donor Atorvastatin Treatment in Preventing Severe Acute GVHD After Nonmyeloablative Peripheral Blood Stem Cell Transplant in Patients With Hematological Malignancies	Aggressive Non-Hodgkin Lymphoma|Myelodysplastic/Myeloproliferative Neoplasm|Non-Hodgkin Lymphoma|Prolymphocytic Leukemia|Recurrent Adult Acute Lymphoblastic Leukemia|Recurrent Adult Acute Myeloid Leukemia|Recurrent Aggressive Adult Non-Hodgkin Lymphoma|Recurrent Childhood Acute Lymphoblastic Leukemia|Recurrent Childhood Acute Myeloid Leukemia|Recurrent Chronic Lymphocytic Leukemia|Recurrent Chron…	Drug: Atorvastatin Calcium|Drug: Cyclosporine|Drug: Fludarabine Phosphate|Other: Laboratory Biomarker Analysis|Drug: Mycophenolate Mofetil|Procedure: Nonmyeloablative Allogeneic Hematopoietic Stem Cell Transplantation|Procedure: Peripheral Blood Stem Cell Transplantation|Radiation: Total-Body Irradiation	Fred Hutchinson Cancer Research Center|National Cancer Institute (NCI)|National Heart, Lung, and Blood Institute (NHLBI)		Interventional	https://ClinicalTrials.gov/show/NCT01527045
	Phase 2	A Multicenter Open Label Phase II Study of Pomalidomide and Cyclophosphamide and Dexamethasone in Relapse/Refractory Multiple Myeloma Patients Who Were First Treated Within the IFM/DFCI 2009 Trial	Multiple Myeloma|First Relapse	Drug: PCD|Procedure: Autologous transplantation (ASCT)	Institut Curie|Intergroupe Francophone du Myelome|Celgene Corporation		Interventional	https://ClinicalTrials.gov/show/NCT02244125
	Phase 2	Investigation of the Enhancement of Response to Hepatitis B Vaccine by Lenalidomide in Plasma Cell Dyscrasias	Plasma Cell Disorder	Drug: Lenalidomide|Drug: Placebo	Boston VA Research Institute, Inc.|Dana-Farber Cancer Institute		Interventional	https://ClinicalTrials.gov/show/NCT02041325
	Phase 2	Glutamine in Preventing Peripheral Neuropathy in Patients With Multiple Myeloma Receiving Bortezomib	Chemotherapeutic Agent Toxicity|Multiple Myeloma|Peripheral Neuropathy	Drug: glutamine|Other: quality-of-life assessment|Other: placebo	Beth Faiman|National Cancer Institute (NCI)|Case Comprehensive Cancer Center		Interventional	https://ClinicalTrials.gov/show/NCT01783522
	Phase 2	Pembrolizumab, Lenalidomide, and Dexamethasone in Treating Patients With Newly Diagnosed Multiple Myeloma Eligible for Stem Cell Transplant	Plasma Cell Myeloma	Drug: Dexamethasone|Other: Laboratory Biomarker Analysis|Drug: Lenalidomide|Biological: Pembrolizumab	Mayo Clinic|National Cancer Institute (NCI)		Interventional	https://ClinicalTrials.gov/show/NCT02880228
	Phase 2	Intervention for Symptom Burden During Maintenance Therapy for Multiple Myeloma	Myeloma	Drug: Minocycline|Other: Placebo|Behavioral: Questionnaires	M.D. Anderson Cancer Center|National Cancer Institute (NCI)		Interventional	https://ClinicalTrials.gov/show/NCT01793051
	Phase 2	Allogeneic GM-CSF Vaccine and Lenalidomide in Treating Myeloma Patients With Near Complete Remission	Multiple Myeloma	Drug: Lenalidomide|Biological: Allogeneic Myeloma Vaccine|Biological: Prevnar-13	Sidney Kimmel Comprehensive Cancer Center|Celgene Corporation		Interventional	https://ClinicalTrials.gov/show/NCT01349569
	Phase 2	Cediranib Maleate and Olaparib Compared to Bevacizumab in Treating Patients With Recurrent Glioblastoma	Recurrent Glioblastoma	Biological: Bevacizumab|Drug: Cediranib Maleate|Other: Laboratory Biomarker Analysis|Drug: Olaparib	National Cancer Institute (NCI)		Interventional	https://ClinicalTrials.gov/show/NCT02974621
	Phase 2	Autologous Stem Cell Transplant Followed By Maintenance Therapy in Treating Elderly Patients With Multiple Myeloma	Extramedullary Plasmacytoma|Isolated Plasmacytoma of Bone|Light Chain Deposition Disease|Primary Systemic Amyloidosis|Stage I Multiple Myeloma|Stage II Multiple Myeloma|Stage III Multiple Myeloma	Drug: dexamethasone|Drug: cisplatin|Drug: doxorubicin|Drug: cyclophosphamide|Drug: etoposide|Drug: bortezomib|Drug: thalidomide|Drug: melphalan|Procedure: autologous stem cell transplant	University of Iowa|National Cancer Institute (NCI)		Interventional	https://ClinicalTrials.gov/show/NCT01849783
	Phase 2	Dendritic Cell/Myeloma Fusion Vaccine for Multiple Myeloma (BMT CTN 1401)	Multiple Myeloma	Procedure: Tumor Cell Collection|Procedure: Autologous Stem Cell Transplant|Drug: Melphalan|Procedure: Leukapheresis|Biological: Myeloma vaccine|Drug: GM-CSF|Drug: Lenalidomide	National Heart, Lung, and Blood Institute (NHLBI)|Blood and Marrow Transplant Clinical Trials Network|National Cancer Institute (NCI)|National Marrow Donor Program		Interventional	https://ClinicalTrials.gov/show/NCT02728102
	Phase 2	Doxorubicin With Upfront Dexrazoxane Plus Olaratumab for the Treatment of Advanced or Metastatic Soft Tissue Sarcoma	Sarcoma, Soft Tissue|Soft Tissue Sarcoma|Undifferentiated Pleomorphic Sarcoma|Leiomyosarcoma|Liposarcoma|Synovial Sarcoma|Myxofibrosarcoma|Angiosarcoma|Fibrosarcoma|Malignant Peripheral Nerve Sheath Tumor|Epithelioid Sarcoma	Drug: Dexrazoxane|Drug: Doxorubicin|Drug: Olaratumab	Washington University School of Medicine		Interventional	https://ClinicalTrials.gov/show/NCT02584309
	Phase 2	Trametinib in Treating Patients With Epithelioid Hemangioendothelioma That Is Metastatic, Locally Advanced, or Cannot Be Removed by Surgery	Epithelioid Hemangioendothelioma	Other: Laboratory Biomarker Analysis|Other: Questionnaire Administration|Drug: Trametinib	National Cancer Institute (NCI)		Interventional	https://ClinicalTrials.gov/show/NCT03148275
	Phase 2	Study of Canfosfamide in Refractory or Relapsed Mantle Cell, Diffuse Large B Cell Lymphoma and Multiple Myeloma	Mantle Cell Lymphoma|B Cell Lymphoma|Multiple Myeloma	Drug: Canfosfamide HCl for injection	Telik		Interventional	https://ClinicalTrials.gov/show/NCT01148108
	Phase 2	Study of MLN9708 Plus Oral Dexamethasone or Plus Oral Cyclophosphamide and Dexamethasone or Plus Bendamustine and Dexamethasone or Plus Oral Thalidomide and Dexamethasone Followed by Maintenance With MLN9708 in Newly Diagnosed Elderly Multiple Myeloma Patients	Multiple Myeloma	Drug: MLN9708|Drug: Dexamethasone|Drug: Cyclophosphamide|Drug: Bendamustine|Drug: Thalidomide	Silvio Aime|University of Turin, Italy		Interventional	https://ClinicalTrials.gov/show/NCT02586038
	Phase 2	ACVDL Treatment for Patients With Newly Diagnosed Multiple Myeloma	Multiple Myeloma	Drug: Doxorubicin|Drug: Bortezomib|Drug: Lenalidomide|Drug: Dexamethasone|Drug: Cyclophosphamide	Vejle Hospital|The University of Hong Kong		Interventional	https://ClinicalTrials.gov/show/NCT01481194
	Phase 2	THAL-DEX Incorporated Into Double PBSC Autotransplantation for Untreated Multiple Myeloma (MM)	Multiple Myeloma	Drug: Thalidomide|Drug: Dexamethasone|Drug: Zoledronic acid|Drug: Cyclophosphamide|Drug: Melphalan	Azienda Ospedaliera Universitaria di Bologna Policlinico S. Orsola Malpighi		Interventional	https://ClinicalTrials.gov/show/NCT01341262
	Phase 2	Study of Treatment for Newly Diagnosed Multiple Myeloma Patients Older Than 65 Years With Sequential Melphalan/Prednisone/Velcade (MPV) Followed by Revlimid/Low Dose Dexamethasone (Rd) Versus Alternating Velcade/Melphalan/Prednisone (MPV) With Revlimid/Low Dose Dexamethasone	Multiple Myeloma	Drug: Melphalan|Drug: Prednisone|Drug: Velcade|Drug: Revlimid|Drug: Dexamethasone	PETHEMA Foundation|Janssen-Cilag Ltd.|Celgene|TFS Trial Form Support		Interventional	https://ClinicalTrials.gov/show/NCT01237249
	Phase 2	Cyclophosphamide for Prevention of Graft-Versus-Host Disease After Allogeneic Peripheral Blood Stem Cell Transplantation in Patients With Hematological Malignancies	Accelerated Phase Chronic Myelogenous Leukemia|Adult Acute Lymphoblastic Leukemia in Remission|Adult Acute Megakaryoblastic Leukemia (M7)|Adult Acute Myeloid Leukemia in Remission|Adult Erythroleukemia (M6a)|Adult Nasal Type Extranodal NK/T-cell Lymphoma|Adult Pure Erythroid Leukemia (M6b)|Anaplastic Large Cell Lymphoma|Angioimmunoblastic T-cell Lymphoma|Blastic Phase Chronic Myelogenous Leukemia…	Drug: cyclophosphamide|Drug: cyclosporine|Procedure: peripheral blood stem cell transplantation|Radiation: total-body irradiation|Drug: fludarabine phosphate|Drug: busulfan|Procedure: allogeneic hematopoietic stem cell transplantation	Fred Hutchinson Cancer Research Center|National Cancer Institute (NCI)		Interventional	https://ClinicalTrials.gov/show/NCT01427881
	Phase 2	Trial of ID-Specific Donor Vaccinated Lymphocyte Infusion for Patients With Myeloma Relapsing or Failing to Achieve a Complete Remission After an Allogenic Transplant	Myeloma	Biological: KLH Vaccine|Biological: KLH-id Vaccine|Drug: GM-CSF|Procedure: Apheresis|Procedure: Donor Lymphocyte Infusion (DLI)	M.D. Anderson Cancer Center		Interventional	https://ClinicalTrials.gov/show/NCT01174082
	Phase 2	Study of Bortezomib,Lenalidomide,Dexamethasone & Elotuzumab in Newly Diagnosed MM	Multiple Myeloma	Drug: Lenalidomide|Drug: Elotuzumab|Drug: Bortezomib|Drug: Dexamethasone|Procedure: Stem Cell Mobilization	Dana-Farber Cancer Institute|Bristol-Myers Squibb		Interventional	https://ClinicalTrials.gov/show/NCT02375555
	Phase 2	PD and Safety of TG-0054 Combined With G-CSF in Multiple Myeloma, Non-Hodgkin Lymphoma and Hodgkin Disease Patients	Multiple Myeloma|Non-Hodgkin Lymphoma|Hodgkin Disease	Drug: TG-0054 combined with G-CSF	TaiGen Biotechnology Co., Ltd.		Interventional	https://ClinicalTrials.gov/show/NCT02104427
	Phase 2	Bortezomib, Dexamethasone, and Cyclophosphamide in Treating Older Patients With Multiple Myeloma	Stage I Multiple Myeloma|Stage II Multiple Myeloma|Stage III Multiple Myeloma	Drug: bortezomib|Drug: cyclophosphamide|Drug: dexamethasone|Other: laboratory biomarker analysis|Other: quality-of-life assessment	Case Comprehensive Cancer Center|National Cancer Institute (NCI)		Interventional	https://ClinicalTrials.gov/show/NCT02082405
	Phase 2	Carfilzomib, Lenalidomide, and Dexamethasone Before and After Stem Cell Transplant in Treating Patients With Newly Diagnosed Multiple Myeloma	Stage I Multiple Myeloma|Stage II Multiple Myeloma|Stage III Multiple Myeloma	Drug: dexamethasone|Drug: carfilzomib|Drug: lenalidomide|Procedure: autologous hematopoietic stem cell transplantation|Other: laboratory biomarker analysis	University of Chicago|National Cancer Institute (NCI)		Interventional	https://ClinicalTrials.gov/show/NCT01816971
	Phase 2	2015-10: Expanded Natural Killer Cells and Elotuzumab for High-Risk Myeloma Post- Autologous Stem Cell Transplant (ASCT)	Multiple Myeloma	Drug: Elotuzumab|Drug: Melphalan|Procedure: Autologous Stem Cell Transplant (ASCT)|Biological: Expanded Natural Killer (ENK) Cells|Drug: ALT-803	University of Arkansas|Bristol-Myers Squibb|Altor Bioscience Corporation		Interventional	https://ClinicalTrials.gov/show/NCT03003728
	Phase 2	Manage Diarrhea in Patients With Multiple Myeloma While Receiving Conditioning Chemotherapy for Autologous SCT	Multiple Myeloma	Other: SBI|Drug: Colesevelam|Other: Double Placebo	Mayo Clinic|Entera Health, Inc		Interventional	https://ClinicalTrials.gov/show/NCT02619812
	Phase 2	SMAC Mimetic LCL161 Alone or With Cyclophosphamide in Treating Patients With Relapsed or Refractory Multiple Myeloma	Recurrent Plasma Cell Myeloma|Refractory Plasma Cell Myeloma	Drug: Cyclophosphamide|Other: Laboratory Biomarker Analysis|Other: Pharmacological Study|Other: Quality-of-Life Assessment|Drug: Smac Mimetic LCL161	Mayo Clinic|National Cancer Institute (NCI)		Interventional	https://ClinicalTrials.gov/show/NCT01955434
	Phase 2	Evaluation of Votrient in Angiosarcoma	Angiosarcoma	Drug: Pazopanib + Paclitaxel	Heidelberg University|UniversitÃ¤tsmedizin Mannheim|HELIOS Klinikum Berlin-Buch|University Hospital Dresden|UniversitÃ¤tsklinikum Hamburg-Eppendorf|University Hospital, Essen|Hannover Medical School|Klinikum der Universitaet Muenchen, Grosshadern|Medical University of Vienna|Medical University of Graz|Medical University Innsbruck|GlaxoSmithKline		Interventional	https://ClinicalTrials.gov/show/NCT02212015
	Phase 2	Combination Immunotherapy and Autologous Stem Cell Transplantation for Myeloma	Myeloma	Biological: Prevnar- Pneumococcal Conjugate Vaccine (PCV)|Other: Activated/costimulated autologous T-cell|Drug: Lenalidomide|Biological: MAGE-A3, HiltonolÂ® (Poly-ICLC)	University of Pennsylvania		Interventional	https://ClinicalTrials.gov/show/NCT01245673
	Phase 2	Acceleration of Platelet Recovery Following Autologous Peripheral Blood Stem Cell Transplant (PBSC) in Hodgkin, Non-Hodgkin Lymphoma or Multiple Myeloma Patients	Lymphoma, Non-Hodgkin|Hodgkin Disease|Multiple Myeloma	Drug: TXA127|Drug: Placebo	Tarix Pharmaceuticals		Interventional	https://ClinicalTrials.gov/show/NCT01121120
	Phase 2	Efficacy, Safety and Pharmacokinetics of Topical Timolol in Infants With Infantile Hemangioma (IH)	Infantile Hemangioma	Drug: 0.25% Timolol Maleate Gel Forming Solution|Drug: 0.5% Timolol Maleate Gel Forming Solution	Chiara Melloni|The EMMES Corporation|Duke University		Interventional	https://ClinicalTrials.gov/show/NCT02913612
	Phase 2	Intralesional Bevacizumab for Treating AIDS-associated KaposiÂ´s Sarcoma of the Larynx, Pharynx and Oral Cavity	KaposiÂ´s Sarcoma	Drug: Bevacizumab	Centro de InvestigaciÃ³n en. Enfermedades Infecciosas, Mexico		Interventional	https://ClinicalTrials.gov/show/NCT01296815
	Phase 2	Carfilzomib, Clarithromycin (BiaxinÂ®), Lenalidomide (RevlimidÂ®), and Dexamethasone (DecadronÂ®) [Car-BiRD] Therapy for Subjects With Multiple Myeloma	Multiple Myeloma	Drug: carfilzomib|Drug: Dexamethasone|Drug: Clarithromycin|Drug: Lenalidomide|Drug: Dexamethasone|Drug: Lenalidomide	Weill Medical College of Cornell University|Onyx Therapeutics, Inc.		Interventional	https://ClinicalTrials.gov/show/NCT01559935
	Phase 2	A Study to Evaluate the Safety, Pharmacokinetics, and Hematopoietic Stem Cell Mobilization of TG-0054 Alone or in Combination With G-CSF in Patients With Multiple Myeloma, Non-Hodgkin Lymphoma or Hodgkin Disease	Multiple Myeloma|Non-hodgkin's Lymphoma|Hodgkin's Disease	Drug: TG-0054	TaiGen Biotechnology Co., Ltd.		Interventional	https://ClinicalTrials.gov/show/NCT01458288
	Phase 2	Study of Elotuzumab With Lenalidomide as Maintenance After Autologous Stem Cell Transplant (ASCT)	Myeloma	Drug: Elotuzumab|Drug: Dexamethasone acetate|Drug: Diphenhydramine|Drug: Famotidine|Drug: Lenalidomide|Behavioral: Symptom Questionnaire	M.D. Anderson Cancer Center|Bristol-Myers Squibb		Interventional	https://ClinicalTrials.gov/show/NCT02420860
	Phase 2	Phase II Study of V-BEAM Conditioning Regimen Prior to Second Autologous Stem Cell Transplantation	Multiple Myeloma	Drug: Bortezomib|Drug: Carmustine|Drug: Etoposide|Drug: Cytarabine|Drug: Melphalan|Procedure: Stem cell infusion	Washington University School of Medicine		Interventional	https://ClinicalTrials.gov/show/NCT01653418
	Phase 2	Vorinostat Plus Lenalidomide and Dexamethasone or Lenalidomide Plus Dexamethasone in Multiple Myeloma Patients Who Experience Biochemical Relapse During Lenalidomide Maintenance Therapy	Multiple Myeloma	Drug: Vorinostat|Drug: Lenalidomide|Drug: Dexamethasone|Drug: Lenalidomide|Drug: Dexamethasone	Tiziana Marangon|University of Turin, Italy		Interventional	https://ClinicalTrials.gov/show/NCT01501370
	Phase 2	Tivantinib in Treating Patients With Relapsed, or Relapsed and Refractory Multiple Myeloma	Refractory Multiple Myeloma	Drug: Tivantinib|Other: Diagnostic laboratory biomarker analysis|Other: Questionnaire administration|Procedure: Quality-of-life assessment	National Cancer Institute (NCI)		Interventional	https://ClinicalTrials.gov/show/NCT01447914
	Phase 2	Bortezomib Based Consolidation in Multiple Myeloma Patients Completing Stem Cell Transplant	Stage I Multiple Myeloma|Stage II Multiple Myeloma|Stage III Multiple Myeloma	Drug: bortezomib|Drug: cyclophosphamide|Drug: lenalidomide|Other: laboratory biomarker analysis|Drug: dexamethasone|Procedure: quality-of-life assessment	Mayo Clinic		Interventional	https://ClinicalTrials.gov/show/NCT01706666
	Phase 2	Tandem Auto Transplantation in Myeloma Patients With <12 Months of Prior Treatment	Multiple Myeloma	Drug: DPACE (Dexamethasone, Cisplatin, Adriamycin, Cyclophosphamide, Etoposide)|Procedure: Transplant 1 (Velcade, Thalidomide, Dexamethasone, Melphalan)|Procedure: Transplant 2 (Velcade, Gemcitabine, Carmustine, Dexamethasone, Melphalan)|Drug: Consolidation VDT-PACE (Velcade, Dexamethasone, Thalidomide, Cisplatin, Adriamycin, Cyclophosphamide, Etoposide)|Drug: Maintenance Year 1 (Velcade, Thalido…	University of Iowa|National Cancer Institute (NCI)		Interventional	https://ClinicalTrials.gov/show/NCT01548573
	Phase 2	Efficacy and Safety Study of Idelalisib in Subjects With Indolent B-Cell Non-Hodgkin Lymphoma	Follicular Lymphoma|Small Lymphocytic Lymphoma|Lymphoplasmacytic Lymphoma|Marginal Zone Lymphoma	Drug: Idelalisib	Gilead Sciences		Interventional	https://ClinicalTrials.gov/show/NCT01282424
	Phase 2	Non-inferiority Study of XM02 Filgrastim (Granix) and Filgrastim (Neupogen) in Combination With Plerixafor for Autologous Stem Cell Mobilization in Patients With Multiple Myeloma or Non-Hodgkin Lymphoma	Multiple Myeloma|Lymphoma, Non-Hodgkin	Drug: XM02 Filgrastim|Drug: Filgrastim|Procedure: Apheresis|Drug: Plerixafor	Washington University School of Medicine		Interventional	https://ClinicalTrials.gov/show/NCT02098109
	Phase 2	Ixazomib Citrate, Lenalidomide, Dexamethasone, and Daratumumab in Treating Patients With Newly Diagnosed Multiple Myeloma	Plasma Cell Myeloma	Biological: Daratumumab|Drug: Dexamethasone|Drug: Ixazomib Citrate|Other: Laboratory Biomarker Analysis|Drug: Lenalidomide|Other: Questionnaire Administration	Mayo Clinic|National Cancer Institute (NCI)		Interventional	https://ClinicalTrials.gov/show/NCT03012880
	Phase 2	A Study to Investigate ALDOXORUBICIN in HIV-infected Subjects With Kaposi's Sarcoma	Kaposi's Sarcoma|HIV+|HIV Positive|AIDS	Drug: aldoxorubicin	CytRx		Interventional	https://ClinicalTrials.gov/show/NCT02029430
	Phase 2	First Autologous Transplant on Minimal Residual Disease Markers in Previously Untreated Myeloma Undergoing Initial Treatment With Velcade	Multiple Myeloma	Drug: VELCADE|Drug: Lenalidomide|Drug: Dexamethasone|Drug: DVT prophylaxis|Drug: Bisphosphonates|Drug: Liposomal doxorubicin|Drug: Dexamethasone	Vanderbilt-Ingram Cancer Center		Interventional	https://ClinicalTrials.gov/show/NCT01215344
	Phase 2	2015-12: A Study Exploring the Use of Early and Late Consolidation/Maintenance Therapy	Multiple Myeloma	Drug: Carfilzomib|Drug: Thalidomide|Drug: Dexamethasone|Drug: Daratumumab|Drug: Cisplatin|Drug: Adriamycin|Drug: Cyclophosphamide|Drug: Etoposide|Drug: Melphalan|Procedure: ASCT|Drug: Lenalidomide|Drug: Bortezomib	University of Arkansas|Janssen, LP		Interventional	https://ClinicalTrials.gov/show/NCT03004287
	Phase 2	S0833, Bortezomib, Thalidomide, Lenalidomide, Combination Chemotherapy, and Autologous Stem Cell Transplant in Treating Patients With Newly Diagnosed Multiple Myeloma	Multiple Myeloma|Plasma Cell Myeloma	Drug: bortezomib|Drug: cisplatin|Drug: cyclophosphamide|Drug: dexamethasone|Drug: doxorubicin hydrochloride|Drug: etoposide|Drug: lenalidomide|Drug: melphalan|Drug: thalidomide|Genetic: gene expression analysis|Genetic: microarray analysis|Other: laboratory biomarker analysis|Procedure: autologous-autologous tandem hematopoietic stem cell transplantation	Southwest Oncology Group|National Cancer Institute (NCI)		Interventional	https://ClinicalTrials.gov/show/NCT01055301
	Phase 2	Carfilzomib/SAHA Combined With High-Dose Gemcitabine/Busulfan/Melphalan With Autologous Stem Cell Transplant in Myeloma	Myeloma	Drug: Carfilzomib|Drug: SAHA|Drug: Gemcitabine|Drug: Busulfan|Drug: Melphalan|Procedure: Stem Cell Transplant (SCT)|Drug: Palifermin|Drug: Dexamethasone|Drug: Caphosol|Drug: Glutamine|Drug: Pyridoxine	M.D. Anderson Cancer Center		Interventional	https://ClinicalTrials.gov/show/NCT02114502
	Phase 2	Panobinostat Combined With High-Dose Gemcitabine/Busulfan/Melphalan With Autologous Stem Cell Transplant for Patients With Refractory/Relapsed Myeloma	Multiple Myeloma	Drug: Busulfan|Drug: Palifermin|Drug: Panobinostat|Drug: Gemcitabine|Drug: Melphalan|Drug: Dexamethasone acetate|Drug: Caphosol|Drug: Glutamine|Drug: Pyridoxine|Procedure: Stem Cell Transplant	M.D. Anderson Cancer Center|Novartis Pharmaceuticals		Interventional	https://ClinicalTrials.gov/show/NCT02506959
	Phase 2	High-Dose Gemcitabine, Busulfan and Melphalan With Hematopoietic-Cell Support for Patients With Poor-Risk Myeloma	Myeloma	Drug: Palifermin|Drug: Dexamethasone|Drug: Gemcitabine|Drug: Busulfan|Drug: Melphalan|Procedure: Stem Cell Transplant|Drug: G-CSF	M.D. Anderson Cancer Center		Interventional	https://ClinicalTrials.gov/show/NCT01237951
	Phase 2	RO4929097 After Autologous Stem Cell Transplant in Treating Patients With Multiple Myeloma	DS Stage I Plasma Cell Myeloma|DS Stage II Plasma Cell Myeloma|DS Stage III Plasma Cell Myeloma|Refractory Plasma Cell Myeloma	Procedure: Autologous Hematopoietic Stem Cell Transplantation|Drug: Gamma-Secretase Inhibitor RO4929097|Procedure: Hematopoietic Stem Cell Mobilization|Procedure: In Vitro-Treated Peripheral Blood Stem Cell Transplantation|Other: Laboratory Biomarker Analysis|Drug: Melphalan	National Cancer Institute (NCI)		Interventional	https://ClinicalTrials.gov/show/NCT01251172
	Phase 2	High Dose Busulfan and Bortezomib in Treating Patients With High Risk Multiple Myeloma Undergoing Stem Cell Transplant	Refractory Multiple Myeloma|Stage I Multiple Myeloma|Stage II Multiple Myeloma|Stage III Multiple Myeloma	Other: pharmacological study|Drug: tacrolimus|Drug: sirolimus|Biological: anti-thymocyte globulin|Drug: fludarabine phosphate|Drug: busulfan|Drug: bortezomib|Procedure: allogeneic hematopoietic stem cell transplantation|Other: laboratory biomarker analysis	Barbara Ann Karmanos Cancer Institute|National Cancer Institute (NCI)		Interventional	https://ClinicalTrials.gov/show/NCT01534143
	Phase 2	Busulfan, Melphalan, and Bortezomib Before First-Line Stem Cell Transplant in Treating Patients With Multiple Myeloma	DS Stage I Plasma Cell Myeloma|DS Stage II Plasma Cell Myeloma|DS Stage III Plasma Cell Myeloma|Refractory Plasma Cell Myeloma	Drug: Busulfan|Drug: Melphalan|Drug: Bortezomib|Procedure: Autologous Hematopoietic Stem Cell Transplantation|Procedure: Peripheral Blood Stem Cell Transplantation|Other: Laboratory Biomarker Analysis|Other: Pharmacological Study	Albert Einstein College of Medicine, Inc.|National Cancer Institute (NCI)		Interventional	https://ClinicalTrials.gov/show/NCT01605032
	Phase 2	Continuing Treatment for Subjects Who Have Participated in a Prior Protocol Investigating Elotuzumab	Multiple Myeloma	Drug: Elotuzumab|Drug: Dexamethasone|Drug: Dexamethasone|Drug: Lenalidomide|Drug: Bortezomib	Bristol-Myers Squibb|AbbVie		Interventional	https://ClinicalTrials.gov/show/NCT02719613
	Phase 2	Pilot Study Using Propranolol to Decrease Gene Expression of Stress-Mediated Beta-Adrenergic Pathways in Hematopoietic Stem Cell Transplant Recipients	Multiple Myeloma	Drug: Propranolol	Medical College of Wisconsin|University of California, Los Angeles		Interventional	https://ClinicalTrials.gov/show/NCT02420223
	Phase 2	Optimising Renal Outcome in Myeloma Renal Failure	Multiple Myeloma|Chronic Kidney Disease	Drug: Bortezomib|Drug: Thalidomide|Drug: Bendamustine|Drug: Dexamethasone	Oxford University Hospitals NHS Trust|Janssen-Cilag Ltd.|Bloodwise|University of Warwick|University of Birmingham		Interventional	https://ClinicalTrials.gov/show/NCT02424851
	Phase 2	Pomalidomide, Ixazomib Citrate, and Dexamethasone in Treating Patients With Previously Treated Multiple Myeloma or Plasma Cell Leukemia	Plasma Cell Leukemia|Plasma Cell Myeloma|Plasmacytoma	Drug: Dexamethasone|Drug: Ixazomib Citrate|Other: Laboratory Biomarker Analysis|Drug: Pomalidomide	Mayo Clinic|National Cancer Institute (NCI)		Interventional	https://ClinicalTrials.gov/show/NCT02547662
	Phase 2	A Study of Bone Marrow Transplantation Using Fully-Matched Relatives as Donors for Patients With Hematological Malignancies	Hematological Malignancies|Leukemia|Lymphoma|Multiple Myeloma|Hodgkin's Disease	Device: Matched Sibling Allogeneic Transplantation	Sidney Kimmel Cancer Center at Thomas Jefferson University|Thomas Jefferson University		Interventional	https://ClinicalTrials.gov/show/NCT01315132
	Phase 2	A Phase II Study of Carfilzomib in Relapsed WaldenstrÃ¶m's Macroglobulinemia (WM) IST-CAR-531	Waldenstrom|Prior Bortezomib Therapy Acceptable.	Drug: Carfilzomib|Drug: Rituximab|Drug: Dexamethasone	Hackensack University Medical Center|Onyx Therapeutics, Inc.		Interventional	https://ClinicalTrials.gov/show/NCT01813227
	Phase 2	Hyperbaric Oxygen Therapy for Hematopoietic Progenitor Cell Collection in Poor Mobilizers	Bone Marrow Transplantation|Hematopoietic Stem Cells|Multiple Myeloma|Lymphoma	Drug: Neupogen|Procedure: Hyperbaric oxygen therapy|Drug: Plerixafor	University of Maryland|Healogics		Interventional	https://ClinicalTrials.gov/show/NCT02682953
	Phase 2	Safety and Efficacy of Saracatinib In Subjects With Lymphangioleiomyomatosis	Pulmonary Lymphangioleiomyomatosis	Drug: saracatinib	Baylor College of Medicine|University of Cincinnati|Brigham and Women's Hospital|Stanford University|Loyola University|University of South Florida|National Institutes of Health (NIH)		Interventional	https://ClinicalTrials.gov/show/NCT02737202
	Phase 2	Id-KLH Vaccine + T Cells	Multiple Myeloma	Biological: CD3/CD28	University of Pennsylvania		Interventional	https://ClinicalTrials.gov/show/NCT01426828
	Phase 2	Vinorelbine Tartrate and Cyclophosphamide in Combination With Bevacizumab or Temsirolimus in Treating Patients With Recurrent or Refractory Rhabdomyosarcoma	Adult Rhabdomyosarcoma|Childhood Alveolar Rhabdomyosarcoma|Childhood Pleomorphic Rhabdomyosarcoma|Childhood Rhabdomyosarcoma With Mixed Embryonal and Alveolar Features|Previously Treated Childhood Rhabdomyosarcoma|Recurrent Adult Soft Tissue Sarcoma|Recurrent Childhood Rhabdomyosarcoma	Biological: Bevacizumab|Drug: Cyclophosphamide|Other: Laboratory Biomarker Analysis|Drug: Temsirolimus|Drug: Vinorelbine Tartrate	National Cancer Institute (NCI)		Interventional	https://ClinicalTrials.gov/show/NCT01222715
	Phase 2	Enhancing Anti-Myeloma Vaccine Response After Autologous Stem Cell Transplantation	Plasma Cell Myeloma	Drug: Melphalan|Procedure: Peripheral Blood Stem Cell Transplantation--CD34 HSCT|Procedure: Peripheral Blood Stem Cell Transplantation--AHSCT|Biological: T Cell-Depleted Hematopoietic Stem Cell Transplantation|Biological: Tetanus Toxoid Vaccine|Biological: Therapeutic Autologous Lymphocytes|Biological: Trivalent Influenza Vaccine|Biological: XBP1-US/XBP1-SP/CD138/CS1 Multipeptide Vaccine PVX-410	Emory University|OncoPep, Inc.		Interventional	https://ClinicalTrials.gov/show/NCT02700841
	Phase 2	Topical Timolol Gel for the Treatment of Infantile Hemangiomas	Hemangioma	Drug: timolol maleate 0.5% gel	Rady Children's Hospital, San Diego|Valeant Pharmaceuticals		Interventional	https://ClinicalTrials.gov/show/NCT02145884
	Phase 2	Daratumumab in Treating Patients With Multiple Myeloma	Plasma Cell Myeloma	Biological: Daratumumab	Ohio State University Comprehensive Cancer Center		Interventional	https://ClinicalTrials.gov/show/NCT02944565
	Phase 2	Pazopanib Hydrochloride in Treating Patients With Advanced Angiosarcoma	Adult Angiosarcoma|Recurrent Adult Soft Tissue Sarcoma|Stage III Adult Soft Tissue Sarcoma|Stage IV Adult Soft Tissue Sarcoma	Drug: pazopanib hydrochloride|Other: laboratory biomarker analysis|Procedure: positron emission tomography|Procedure: computed tomography|Radiation: fludeoxyglucose F 18	Fox Chase Cancer Center|National Cancer Institute (NCI)		Interventional	https://ClinicalTrials.gov/show/NCT01462630
	Phase 2	Adjunctive Everolimus (RAD 001) Therapy for Epilepsy in Children With Sturge-Weber Syndrome (SWS)	Sturge Weber Syndrome	Drug: Everolimus	Baylor College of Medicine|Novartis Pharmaceuticals		Interventional	https://ClinicalTrials.gov/show/NCT01997255
	Phase 2	Nebulized or Inhaled Albuterol for Lymphangioleiomyomatosis	Lymphangioleiomyomatosis	Drug: albuterol inhaler|Procedure: PFT|Drug: albuterol nebulizer	National Heart, Lung, and Blood Institute (NHLBI)|National Institutes of Health Clinical Center (CC)		Interventional	https://ClinicalTrials.gov/show/NCT01799538
	Phase 2	TKI 258 in Von Hippel-Lindau Syndrome (VHL)	Von Hippel-Lindau Syndrome	Drug: Dovitinib	M.D. Anderson Cancer Center|Novartis		Interventional	https://ClinicalTrials.gov/show/NCT01266070
	Phase 2	COLA: A Pilot Clinical Trial of COX-2 Inhibition in LAM and TSC	Lymphangioleiomyomatosis (LAM)	Drug: Celecoxib	Brigham and Women's Hospital|National Heart, Lung, and Blood Institute (NHLBI)		Interventional	https://ClinicalTrials.gov/show/NCT02484664
	Phase 2	MSC and HSC Coinfusion in Mismatched Minitransplants	Leukemia, Myeloid, Acute|Leukemia, Lymphoblastic, Acute|Leukemia, Myelocytic, Chronic|Myeloproliferative Disorders|Myelodysplastic Syndromes|Multiple Myeloma|Leukemia, Lymphocytic, Chronic|Hodgkin's Disease|Lymphoma, Non-Hodgkin	Biological: Mesenchymal stem cells|Other: Isotonic solution	University Hospital of Liege|AZ Sint-Jan AV|Ziekenhuis Netwerk Antwerpen (ZNA)|Jules Bordet Institute|Universiteit Antwerpen|AZ-VUB|Cliniques universitaires Saint-Luc- UniversitÃ© Catholique de Louvain|University Hospital, Ghent		Interventional	https://ClinicalTrials.gov/show/NCT01045382
	Phase 2	Plerixafor and Sargramostim (GM-CSF) for Mobilization of Allogeneic Sibling Donors	Leukemia, Myeloid, Acute|Myelodysplastic Syndromes|Lymphoma, Non-Hodgkin|Hodgkin Disease|Leukemia, Lymphocytic, Chronic, B-Cell|Multiple Myeloma	Drug: Sargramostim|Drug: Plerixafor	Washington University School of Medicine		Interventional	https://ClinicalTrials.gov/show/NCT01158118
	Phase 2	A Trial of Pembrolizumab for Refractory Atypical and Anaplastic Meningioma	Atypical Meningioma|Anaplastic Meningioma|Hemangiopericytoma	Drug: Pembrolizumab	Rabin Medical Center		Interventional	https://ClinicalTrials.gov/show/NCT03016091
	Phase 2	A Study of Belimumab in Treating Symptomatic Waldenstroms Macroglobulinaemia	Symptomatic Waldenstroms Macroglobulinaemia	Drug: Belimumab	Cancer Trials Australia|Human Genome Sciences Inc.		Interventional	https://ClinicalTrials.gov/show/NCT01142011
	Phase 2	Optune Delivered Electric Field Therapy and Bevacizumab in Treating Patients With Recurrent or Progressive Grade 2 or 3 Meningioma	Anaplastic (Malignant) Meningioma|Atypical Meningioma|Grade II Meningioma|Grade III Meningioma|Recurrent Meningioma|Supratentorial Meningioma	Biological: Bevacizumab|Procedure: Electric Field Therapy|Device: NovoTTF-100A Device|Procedure: Quality-of-Life Assessment	Northwestern University|NovoCure Ltd.|National Cancer Institute (NCI)		Interventional	https://ClinicalTrials.gov/show/NCT02847559
	Phase 2	A Study of Nivolumab in Adult Participants With Recurrent High-Grade Meningioma	Meningiomas	Drug: Nivolumab	Dana-Farber Cancer Institute		Interventional	https://ClinicalTrials.gov/show/NCT02648997
	Phase 2	Efficacity of Idelalisib and Obinutuzumab in Patient With Relapsed Refractory Waldenstrom's Macroglobulinemia	Waldenstrom Macroglobulinemia	Drug: Obinutuzumab|Drug: Idelalisib	French Innovative Leukemia Organisation		Interventional	https://ClinicalTrials.gov/show/NCT02962401
	Phase 2	Combination of Everolimus and Octreotide LAR in Aggressive Recurrent Meningiomas	Recurrent Meningiomas|Resistant Meningiomas	Drug: Everolimus|Drug: Octreotide	Assistance Publique Hopitaux De Marseille		Interventional	https://ClinicalTrials.gov/show/NCT02333565
	Phase 2	Study of Phosphatidylinositol-3-kinase (PI3K) Inhibitor Idelalisib (GS-1101) in WaldenstrÃ¶m Macroglobulinemia	Waldenstrom's Macroglobulinemia	Drug: GS-1101	Dana-Farber Cancer Institute|Gilead Sciences		Interventional	https://ClinicalTrials.gov/show/NCT02439138
	Phase 2	A Phase II Study of Doxycycline in Relapsed NHL	Adult Diffuse Large B-Cell Lymphoma|Mantle Cell Lymphoma Recurrent|Lymphoma, Follicular|Marginal Zone B-Cell Lymphoma|Malignant Lymphoma - Lymphoplasmacytic|Waldenstrom Macroglobulinemia|Small Lymphocytic Lymphoma|Chronic Lymphocytic Leukemia (CLL)|T-Cell Lymphoma	Drug: Doxycycline	University of Rochester		Interventional	https://ClinicalTrials.gov/show/NCT02086591
	Phase 2	Cyclophosphamide as Sole Graft-Versus-Host-Prophylaxis After Allogeneic Stem Cell Transplantation	Multiple Myeloma|Non-Hodgkin-Lymphoma|Hodgkin's Disease	Drug: Cyclophosphamide	University of Cologne		Interventional	https://ClinicalTrials.gov/show/NCT01283776
	Phase 2	Fase II Study With BRB for Non-Hodgkin Lymphoplasmacytic Lymphoma/Waldenstrom Macroglobulinemia's	Waldenstrom's Macroglobulinemia	Drug: Bortezomib-Rituximab-Bendamustine	Fondazione Italiana Linfomi ONLUS		Interventional	https://ClinicalTrials.gov/show/NCT02371148
	Phase 2	Bortezomib, Dexamethasone, and Rituximab in Previously Untreated Patients With Waldenstrom's Macroglobulinemia	Waldenstrom's Macroglobulinemia	Drug: Bortezomib, Rituximab, Dexamethasone	Meletios A. Dimopoulos|European Myeloma Network|University of Athens		Interventional	https://ClinicalTrials.gov/show/NCT01046006
	Phase 2	A Pilot Study Investigating Apixaban and Dexamethasone InterAction in Multiple Myeloma	Anti-Xa Activity	Drug: apixaban	University of British Columbia		Interventional	https://ClinicalTrials.gov/show/NCT02749617
	Phase 2	Vismodegib and FAK Inhibitor GSK2256098 in Treating Patients With Progressive Meningiomas	Intracranial Meningioma|Recurrent Meningioma|NF2 Gene Mutation	Drug: vismodegib|Drug: GSK2256098	Alliance for Clinical Trials in Oncology|National Cancer Institute (NCI)|GlaxoSmithKline|Genentech, Inc.|Brain Science Foundation		Interventional	https://ClinicalTrials.gov/show/NCT02523014
	Phase 2	89Zr-RO5323441 PET Imaging in Glioblastoma	Glioblastoma	Radiation: Molecular imaging with 89Zr-RO5323441	University Medical Center Groningen		Interventional	https://ClinicalTrials.gov/show/NCT01622764
	Phase 2	PT2385 for the Treatment of Von Hippel-Lindau Disease-Associated Clear Cell Renal Cell Carcinoma	VHL Gene Mutation|VHL|VHL Syndrome|VHL Gene Inactivation|Von Hippel|Von Hippel-Lindau Disease|Von Hippel's Disease|Von Hippel-Lindau Syndrome, Modifiers of|Clear Cell Renal Cell Carcinoma|Clear Cell RCC|ccRCC	Drug: PT2385 Tablets	Peloton Therapeutics, Inc.|National Institutes of Health (NIH)		Interventional	https://ClinicalTrials.gov/show/NCT03108066
	Phase 2	Treatment With Indinavir and Chemotherapy for Advanced Classical Kaposi's Sarcoma	Kaposi's Sarcoma	Drug: Indinavir in association with Vinblastina +/- Bleomicina	Barbara Ensoli, MD, PhD|Istituto Superiore di SanitÃ		Interventional	https://ClinicalTrials.gov/show/NCT01067690
	Phase 2	Imexon for Relapsed Follicular and Aggressive Lymphomas	Follicular Lymphoma|Small Lymphocytic Lymphoma|Marginal Zone Lymphoma|Lymphoplasmacytic Lymphoma|Diffuse Large B Cell Lymphoma|Mantle Cell Lymphoma|Burkitt's Lymphoma	Drug: Imexon	University of Rochester|University of Arizona		Interventional	https://ClinicalTrials.gov/show/NCT01314014
	Phase 2	Safety and Tolerability Study of PCI-32765 in B Cell Lymphoma and Chronic Lymphocytic Leukemia	B-cell Chronic Lymphocytic Leukemia|Small Lymphocytic Lymphoma|Diffuse Well-differentiated Lymphocytic Lymphoma|B Cell Lymphoma|Follicular Lymphoma|Mantle Cell Lymphoma|Non-Hodgkin's Lymphoma|Waldenstrom Macroglobulinemia|Burkitt Lymphoma|B-Cell Diffuse Lymphoma	Drug: PCI-32765	Pharmacyclics LLC.|Janssen Research & Development, LLC		Interventional	https://ClinicalTrials.gov/show/NCT01109069
	Phase 2	Bortezomib in Combination With Liposomal Doxorubicin and Dexamethasone to Treat Plasma Cell Leukemia	Plasma Cell Leukemia|Multiple Myeloma	Drug: Bortezomib|Drug: Liposome doxorubicin|Drug: Dexamethasone	Clinical Service, China|Harbin Hematology and Oncology Institute|Shanghai Changzheng Hospital|Chinese PLA General Hospital|307 Hospital of PLA|Wuhan Union Hospital, China|Beijing Chao Yang Hospital|Henan Provincial Hospital|Peking University Third Hospital		Interventional	https://ClinicalTrials.gov/show/NCT01328236
	Phase 2	Thalidomide, Lenalidomide, and Rituximab for Previously Treated Waldenstrom Macroglobulinemia	Waldenstrom Macroglobulinemia	Drug: Thalidomide|Drug: Lenalidomide|Drug: Rituximab	Weill Medical College of Cornell University|Celgene Corporation		Interventional	https://ClinicalTrials.gov/show/NCT01779167
	Phase 2	Trial of Ixazomib, Dexamethasone and Rituximab in Patients With Untreated Waldenstrom's Macroglobulinemia	Waldenstrom's Macroglobulinemia	Drug: Ixazomib|Drug: Dexamethasone|Drug: Rituximab	Dana-Farber Cancer Institute|Millennium Pharmaceuticals, Inc.		Interventional	https://ClinicalTrials.gov/show/NCT02400437
	Phase 2	Phase II Multicenter, Open-label, Single Arm Clinical Study of Pomalidomide and dexamethasonE and Cyclophosphamide	Relapsed or Refractory Multiple Myeloma	Drug: Imnovid (pomalidomide)|Drug: Dexamethasone|Drug: Endoxan (Cyclophosphamide)	University Hospital Tuebingen		Interventional	https://ClinicalTrials.gov/show/NCT02046915
	Phase 2	Carfilzomib, Rituximab and Dexamethasone in Waldenstrom's Macroglobulinemia	Waldenstrom's Macroglobulinemia	Drug: Dexamethasone|Drug: Carfilzomib|Drug: Rituximab	Dana-Farber Cancer Institute|Amgen		Interventional	https://ClinicalTrials.gov/show/NCT01470196
	Phase 2	Treatment of Primary Plasma Cell Leukaemia in Subjects Under the Age of 70	Multiple Myeloma	Drug: PAD-VCD	Centre Hospitalier Universitaire, Amiens		Interventional	https://ClinicalTrials.gov/show/NCT02858999
	Phase 2	Study of ABT-199 (GDC-199) In Patients With Relapsed Or Refractory WaldenstrÃ¶m Macroglobulinemia	Waldenstrom Macroglobulinemia	Drug: ABT199	Dana-Farber Cancer Institute|AbbVie		Interventional	https://ClinicalTrials.gov/show/NCT02677324
	Phase 2	An Open-label, Phase 2 Study of Acalabrutinib in Subjects With WaldenstrÃ¶m Macroglobulinemia	WaldenstrÃ¶m Macroglobulinemia (WM)	Drug: Acalabrutinib	Acerta Pharma BV		Interventional	https://ClinicalTrials.gov/show/NCT02180724
	Phase 2	Ibrutinib (PCI-32765) in Waldenstrom's Macroglobulinemia	Waldenstrom's Macroglobulinemia	Drug: PCI-32765	Dana-Farber Cancer Institute		Interventional	https://ClinicalTrials.gov/show/NCT01614821
	Phase 2	AZD2014 In NF2 Patients With Progressive or Symptomatic Meningiomas	Neurofibromatosis 2|Meningioma	Drug: AZD2014	Massachusetts General Hospital|AstraZeneca|United States Department of Defense		Interventional	https://ClinicalTrials.gov/show/NCT02831257
	Phase 2	Phase II Study Of Vistusertib (AZD2014) For Recurrent Grade II-III Meningiomas	Meningioma	Drug: AZD2014	Massachusetts General Hospital|National Cancer Institute (NCI)|AstraZeneca		Interventional	https://ClinicalTrials.gov/show/NCT03071874
	Phase 2	High-Dose Busulfan and High-Dose Cyclophosphamide Followed By Donor Bone Marrow Transplant in Treating Patients With Leukemia, Myelodysplastic Syndrome, Multiple Myeloma, or Recurrent Hodgkin or Non-Hodgkin Lymphoma	Accelerated Phase Chronic Myelogenous Leukemia|Adult Acute Lymphoblastic Leukemia in Remission|Adult Acute Megakaryoblastic Leukemia (M7)|Adult Acute Monoblastic Leukemia (M5a)|Adult Acute Monocytic Leukemia (M5b)|Adult Acute Myeloblastic Leukemia With Maturation (M2)|Adult Acute Myeloblastic Leukemia Without Maturation (M1)|Adult Acute Myeloid Leukemia in Remission|Adult Acute Myeloid Leukemia W…	Drug: busulfan|Drug: cyclophosphamide|Procedure: allogeneic bone marrow transplantation|Drug: methylprednisolone|Drug: methotrexate|Drug: cyclosporine	Case Comprehensive Cancer Center		Interventional	https://ClinicalTrials.gov/show/NCT01177371
	Phase 2	Study of High-dose Influenza Vaccine Efficacy by Repeated Dosing IN Gammopathy Patients	Influenza|Multiple Myeloma|Waldenstrom's Macroglobulinemia|Plasma Cell Disorders|MGUS	Biological: Fluzone High Dose Vaccine|Biological: Standard of care/Placebo	Yale University		Interventional	https://ClinicalTrials.gov/show/NCT02566265
	Phase 2	Topical Rapamycin to Erase Angiofibromas in TSC	Angiofibromas|Tuberous Sclerosis	Drug: Placebo|Drug: Rapamycin|Drug: Rapamycin	The University of Texas Health Science Center, Houston		Interventional	https://ClinicalTrials.gov/show/NCT01526356
	Phase 2	Allogeneic Transplantation Using Timed Sequential Busulfan and Fludarabine Conditioning	Leukemia|Acute Myeloid Leukemia|Acute Lymphocytic Leukemia|Chronic Myeloid Leukemia|Chronic Lymphocytic Leukemia|Myeloproliferative Diseases|Non-Hodgkins Lymphoma|Hodgkins Lymphoma|Multiple Myeloma|Myelodysplastic Syndrome	Drug: Fludarabine monophosphate|Drug: Busulfan|Procedure: Stem Cell Infusion|Drug: Tacrolimus|Drug: Methotrexate|Drug: G-CSF	M.D. Anderson Cancer Center		Interventional	https://ClinicalTrials.gov/show/NCT01572662
	Phase 2	A Study of Nintedanib for LymphAngioleioMyomatosis (LAM)	Lymphangioleiomyomatosis	Drug: Nintedanib	IRCCS Multimedica		Interventional	https://ClinicalTrials.gov/show/NCT03062943
	Phase 2	Trial of Aromatase Inhibition in Lymphangioleiomyomatosis	Lymphangioleiomyomatosis	Drug: Letrozole|Drug: Placebo	University of Cincinnati|United States Department of Defense		Interventional	https://ClinicalTrials.gov/show/NCT01353209
	Phase 2	Ofatumumab and Bortezomib in Treating Patients With Previously Untreated Waldenstrom Macroglobulinemia	WaldenstrÃ¶m Macroglobulinemia	Biological: ofatumumab|Drug: bortezomib|Other: laboratory biomarker analysis	Roswell Park Cancer Institute|National Cancer Institute (NCI)|GlaxoSmithKline		Interventional	https://ClinicalTrials.gov/show/NCT01536067
	Phase 2	Alisertib With and Without Rituximab in Treating Patients With Relapsed or Refractory B-Cell Non-Hodgkin Lymphoma	Extranodal Marginal Zone B-cell Lymphoma of Mucosa-associated Lymphoid Tissue|Nodal Marginal Zone B-cell Lymphoma|Recurrent Adult Burkitt Lymphoma|Recurrent Adult Diffuse Large Cell Lymphoma|Recurrent Grade 1 Follicular Lymphoma|Recurrent Grade 2 Follicular Lymphoma|Recurrent Grade 3 Follicular Lymphoma|Recurrent Mantle Cell Lymphoma|Recurrent Marginal Zone Lymphoma|Splenic Marginal Zone Lymphoma…	Drug: alisertib|Biological: rituximab|Other: laboratory biomarker analysis	Kristie Blum|Millennium Pharmaceuticals, Inc.|Ohio State University Comprehensive Cancer Center		Interventional	https://ClinicalTrials.gov/show/NCT01812005
	Phase 2	Bendamustine Hydrochloride, Etoposide, Dexamethasone, and Filgrastim For Peripheral Blood Stem Cell Mobilization in Treating Patients With Refractory or Recurrent Lymphoma or Multiple Myeloma	Adult Nasal Type Extranodal NK/T-cell Lymphoma|Anaplastic Large Cell Lymphoma|Angioimmunoblastic T-cell Lymphoma|Cutaneous B-cell Non-Hodgkin Lymphoma|Extranodal Marginal Zone B-cell Lymphoma of Mucosa-associated Lymphoid Tissue|Intraocular Lymphoma|Nodal Marginal Zone B-cell Lymphoma|Peripheral T-cell Lymphoma|Recurrent Adult Burkitt Lymphoma|Recurrent Adult Diffuse Large Cell Lymphoma|Recurrent…	Drug: bendamustine hydrochloride|Drug: dexamethasone|Biological: filgrastim|Procedure: leukapheresis|Other: laboratory biomarker analysis|Other: flow cytometry|Drug: etoposide	University of Washington|National Cancer Institute (NCI)		Interventional	https://ClinicalTrials.gov/show/NCT01110135
	Phase 2	Study of Akt Inhibitor MK2206 in Patients With Relapsed Lymphoma	Adult Nasal Type Extranodal NK/T-cell Lymphoma|Anaplastic Large Cell Lymphoma|Angioimmunoblastic T-cell Lymphoma|B-cell Adult Acute Lymphoblastic Leukemia|B-cell Chronic Lymphocytic Leukemia|Cutaneous B-cell Non-Hodgkin Lymphoma|Extranodal Marginal Zone B-cell Lymphoma of Mucosa-associated Lymphoid Tissue|Hepatosplenic T-cell Lymphoma|Intraocular Lymphoma|Nodal Marginal Zone B-cell Lymphoma|Noncu…	Drug: Akt inhibitor MK2206|Other: laboratory biomarker analysis	National Cancer Institute (NCI)		Interventional	https://ClinicalTrials.gov/show/NCT01258998
	Phase 2	Nelfinavir Mesylate in Treating Patients With Kaposi Sarcoma	Recurrent Kaposi Sarcoma|Skin Kaposi Sarcoma	Other: Laboratory Biomarker Analysis|Drug: Nelfinavir Mesylate	AIDS Malignancy Consortium|National Cancer Institute (NCI)|The EMMES Corporation|University of Arkansas|University of California, Los Angeles|AIDS and Cancer Specimen Resource		Interventional	https://ClinicalTrials.gov/show/NCT03077451
	Phase 2	Timed Sequential Busulfan and Post Transplant Cyclophosphamide for Allogeneic Transplantation	Other Diseases of Blood and Blood-forming Organs|Acute Myeloid Leukemia|Acute Lymphocytic Leukemia|Chronic Myeloid Leukemia|Chronic Lymphocytic Leukemia|Myelodysplastic Syndrome|Myeloproliferative Syndrome|Non-Hodgkins Lymphoma|Hodgkins Lymphoma|Multiple Myeloma	Drug: Busulfan|Drug: Thiotepa|Drug: Fludarabine monophosphate|Procedure: Stem Cell Infusion|Drug: Mesna|Drug: Cyclophosphamide|Drug: Tacrolimus|Drug: Mycophenolate Mofetil|Drug: G-CSF	M.D. Anderson Cancer Center		Interventional	https://ClinicalTrials.gov/show/NCT02861417
	Phase 2	Pembrolizumab Alone or With Idelalisib or Ibrutinib in Treating Patients With Relapsed or Refractory Chronic Lymphocytic Leukemia or Other Low-Grade B-Cell Non-Hodgkin Lymphomas	Recurrent Chronic Lymphocytic Leukemia|Recurrent Extranodal Marginal Zone Lymphoma of Mucosa-Associated Lymphoid Tissue|Recurrent Grade 1 Follicular Lymphoma|Recurrent Grade 2 Follicular Lymphoma|Recurrent Grade 3 Follicular Lymphoma|Recurrent Lymphoplasmacytic Lymphoma|Recurrent Marginal Zone Lymphoma|Recurrent Nodal Marginal Zone Lymphoma|Recurrent Small Lymphocytic Lymphoma|Recurrent Splenic M…	Drug: Ibrutinib|Drug: Idelalisib|Other: Laboratory Biomarker Analysis|Biological: Pembrolizumab	Mayo Clinic|National Cancer Institute (NCI)		Interventional	https://ClinicalTrials.gov/show/NCT02332980
	Phase 2	A Study to Determine the Effectiveness of Escalating Doses of RAD001 (Everolimus) in Patients With Lymphangioleiomyomatosis	Lymphangioleiomyomatosis	Drug: Everolimus|Drug: Everolimus|Drug: Everolimus	Novartis Pharmaceuticals|Novartis		Interventional	https://ClinicalTrials.gov/show/NCT01059318
	Phase 2	Randomised Trial in Waldenstrom's Macroglobulinaemia	Waldenstrom's Macroglobulinaemia	Drug: Bortezomib|Drug: Cyclophosphamide|Biological: Rituximab|Drug: Fludarabine	University College, London		Interventional	https://ClinicalTrials.gov/show/NCT01592981
	Phase 2	Preservation of Ovarian Function After Hematopoietic Cell Transplant	Multiple Myeloma|Non-Hodgkin Lymphoma|Hodgkin Disease|Acute Myeloid Leukemia|Myeloproliferative Disorders	Drug: Leuprolide|Biological: hematopoietic cell transplant|Biological: reduced intensity allogeneic HCT	Masonic Cancer Center, University of Minnesota|Minnesota Medical Foundation		Interventional	https://ClinicalTrials.gov/show/NCT01343368
	Phase 2	Reduced Intensity Double Umbilical Cord Blood Transplantation	Non-Hodgkin's Lymphoma|Hodgkin's Lymphoma|Multiple Myeloma|Chronic Lymphocytic Leukemia|Acute Myelogenous Leukemia	Drug: Fludarabine|Drug: Melphalan|Radiation: Total Body Radiation|Biological: Cord Blood	Massachusetts General Hospital		Interventional	https://ClinicalTrials.gov/show/NCT01408563
	Phase 2	Ixazomib Citrate and Rituximab in Treating Patients With Indolent B-cell Non-Hodgkin Lymphoma	Chronic Lymphocytic Leukemia|Follicular Lymphoma|Lymphoplasmacytic Lymphoma|Mantle Cell Lymphoma|Marginal Zone Lymphoma|Recurrent Extranodal Marginal Zone Lymphoma of Mucosa-Associated Lymphoid Tissue|Refractory Extranodal Marginal Zone Lymphoma of Mucosa-Associated Lymphoid Tissue|Small Lymphocytic Lymphoma|Waldenstrom Macroglobulinemia	Drug: Ixazomib Citrate|Other: Laboratory Biomarker Analysis|Biological: Rituximab	University of Washington|National Cancer Institute (NCI)		Interventional	https://ClinicalTrials.gov/show/NCT02339922
	Phase 2	Allo HSCT Using RIC for Hematological Diseases	Acute Myelogenous Leukemia|Acute Lymphocytic Leukemia|Chronic Myelogenous Leukemia|Plasma Cell Leukemia|Myelodysplastic Syndromes|Chronic Lymphocytic Leukemia|Small Lymphocytic Lymphoma|B-Cell Lymphoma|Follicular Lymphoma|Lymphoplasmacytic Lymphoma|Mantle-Cell Lymphoma|Prolymphocytic Leukemia|Lymphoblastic Lymphoma|Burkitt's Lymphoma|Non-Hodgkin's Lymphoma|Multiple Myeloma|Myeloproliferative Synd…	Drug: Allopurinol|Drug: Fludarabine|Drug: Cyclophosphamide|Drug: ATG|Radiation: TBI|Drug: Tacrolimus|Drug: MMF|Biological: Peripheral Blood Stem Cells|Biological: Related or Unrelated Bone Marrow Cells	Masonic Cancer Center, University of Minnesota		Interventional	https://ClinicalTrials.gov/show/NCT02661035
	Phase 2	Trebananib in Treating Patients With Advanced Angiosarcoma That Cannot Be Removed by Surgery	Adult Angiosarcoma|Recurrent Adult Soft Tissue Sarcoma|Stage III Adult Soft Tissue Sarcoma|Stage IV Adult Soft Tissue Sarcoma	Other: Laboratory Biomarker Analysis|Biological: Trebananib	National Cancer Institute (NCI)		Interventional	https://ClinicalTrials.gov/show/NCT01623869
	Phase 2	Lenalidomide With or Without Rituximab in Treating Patients With Progressive or Relapsed Chronic Lymphocytic Leukemia, Small Lymphocytic Lymphoma, Prolymphocytic Leukemia, or Non-Hodgkin Lymphoma Previously Treated With Donor Stem Cell Transplant	Adult Nasal Type Extranodal NK/T-cell Lymphoma|Anaplastic Large Cell Lymphoma|Angioimmunoblastic T-cell Lymphoma|Cutaneous B-cell Non-Hodgkin Lymphoma|Extranodal Marginal Zone B-cell Lymphoma of Mucosa-associated Lymphoid Tissue|Hepatosplenic T-cell Lymphoma|Intraocular Lymphoma|Nodal Marginal Zone B-cell Lymphoma|Noncutaneous Extranodal Lymphoma|Peripheral T-cell Lymphoma|Prolymphocytic Leukemia…	Drug: lenalidomide|Biological: rituximab|Other: pharmacological study|Other: laboratory biomarker analysis	Fred Hutchinson Cancer Research Center|National Cancer Institute (NCI)		Interventional	https://ClinicalTrials.gov/show/NCT01419795
	Phase 2	Safety Study of Elotuzumab in Combination With Thalidomide and Dexamethasone in Relapsed and/or Refractory Multiple Myeloma	Relapsed and/or Refractory Multiple Myeloma	Biological: Elotuzumab|Biological: Thalidomide|Biological: Dexamethasone|Biological: Cyclophosphamide	Bristol-Myers Squibb|AbbVie		Interventional	https://ClinicalTrials.gov/show/NCT01632150
	Phase 2	Total Marrow Irradiation and High-dose Melphalan for Double Autologous Hematopoietic Stem Cell Transplantation in Multiple Myeloma	Multiple Myeloma	Radiation: Total marrow irradiation	Maria Sklodowska-Curie Memorial Cancer Center and Institute of Oncology, Gliwice		Interventional	https://ClinicalTrials.gov/show/NCT01665014
	Phase 2	Randomized Trial of Cryotherapy Duration Prior to High Dose Melphalan in Myeloma Patients	Refractory Multiple Myeloma|Stage I Multiple Myeloma|Stage II Multiple Myeloma|Stage III Multiple Myeloma	Procedure: cryotherapy|Other: questionnaire administration|Other: pharmacological study	Ohio State University Comprehensive Cancer Center		Interventional	https://ClinicalTrials.gov/show/NCT01653106
	Phase 2	Gamma Secretase Inhibitor PF-03084014 in Treating Patients With AIDS-Associated Kaposi Sarcoma	AIDS-related Kaposi Sarcoma|HIV Infection|Recurrent Kaposi Sarcoma	Drug: gamma secretase inhibitor PF-03084014|Other: pharmacological study|Other: laboratory biomarker analysis	AIDS Malignancy Consortium|National Cancer Institute (NCI)|The EMMES Corporation		Interventional	https://ClinicalTrials.gov/show/NCT02137564
	Phase 2	Calcineurin Inhibitor-Free GVHD Prevention Regimen After Related Haplo PBSCT	Non-Hodgkin's Lymphoma|Acute Leukemia in Remission|Chronic Myeloid Leukemia|Primary Myelofibrosis|Chronic Myelomonocytic Leukemia|Myelodysplastic Syndromes|Hodgkin Lymphoma|Multiple Myeloma	Drug: Fludarabine|Drug: Busulfan|Drug: Cyclophosphamide|Radiation: Total body irradiation (TBI)|Procedure: Peripheral Blood Hematopoietic Cell Transplantation (HCT)|Drug: Sirolimus (SIR)|Drug: Mycophenolate mofetil (MMF)|Drug: Granulocyte-colony stimulating factor (G-CSF)	H. Lee Moffitt Cancer Center and Research Institute		Interventional	https://ClinicalTrials.gov/show/NCT03018223
	Phase 2	Palifermin With Leuprolide Acetate for the Promotion of Immune Recovery Following Total Body Irradiation Based T-Cell Depleted Allogeneic Hematopoietic Stem Cell Transplantation	Leukemia|Multiple Myeloma|Myelodysplastic Syndrome|Non-Hodgkin's Lymphoma	Biological: Palifermin|Biological: Lupron|Procedure: peripheral blood stem cell transplantation|Radiation: Total-Body Irradiation (TBI)|Drug: Thiotepa|Drug: Cyclophosphamide	Memorial Sloan Kettering Cancer Center|Swedish Orphan Biovitrum		Interventional	https://ClinicalTrials.gov/show/NCT01746849
	Phase 2	Aldesleukin With or Without Ziv-Aflibercept in Treating Patients With Stage III-IV Melanoma That Cannot Be Removed by Surgery	Recurrent Melanoma|Stage IIIA Skin Melanoma|Stage IIIB Skin Melanoma|Stage IIIC Skin Melanoma|Stage IV Skin Melanoma	Biological: Aldesleukin|Other: Laboratory Biomarker Analysis|Biological: Ziv-Aflibercept	National Cancer Institute (NCI)		Interventional	https://ClinicalTrials.gov/show/NCT01258855
	Phase 2	Panobinostat in Treating Patients With Relapsed or Refractory Non-Hodgkin Lymphoma	Adult Nasal Type Extranodal NK/T-cell Lymphoma|Anaplastic Large Cell Lymphoma|Angioimmunoblastic T-cell Lymphoma|Extranodal Marginal Zone B-cell Lymphoma of Mucosa-associated Lymphoid Tissue|Hepatosplenic T-cell Lymphoma|Nodal Marginal Zone B-cell Lymphoma|Peripheral T-cell Lymphoma|Post-transplant Lymphoproliferative Disorder|Recurrent Adult Burkitt Lymphoma|Recurrent Adult Diffuse Large Cell Ly…	Drug: panobinostat|Other: laboratory biomarker analysis|Genetic: western blotting|Genetic: DNA analysis|Other: flow cytometry|Other: pharmacological study|Other: immunohistochemistry staining method	Mayo Clinic|National Cancer Institute (NCI)		Interventional	https://ClinicalTrials.gov/show/NCT01261247
	Phase 2	A Study Evaluating a Proprietary Amino Acid Mixture (EnteradeÂ®) in Patients Receiving High-Dose Melphalan Conditioning Followed by Autologous Stem Cell Transplantation for Multiple Myeloma and Non-Hodgkin Lymphoma	Multiple Myeloma|Non-Hodgkin's Lymphoma	Dietary Supplement: Enterade|Dietary Supplement: Placebo|Other: Standard Supportive Care	Dana-Farber Cancer Institute		Interventional	https://ClinicalTrials.gov/show/NCT02919670
	Phase 2	Ipilimumab With or Without Bevacizumab in Treating Patients With Stage III-IV Melanoma That Cannot Be Removed by Surgery	Recurrent Melanoma|Stage IIIC Skin Melanoma|Stage IV Skin Melanoma	Biological: Bevacizumab|Biological: Ipilimumab|Other: Laboratory Biomarker Analysis	National Cancer Institute (NCI)		Interventional	https://ClinicalTrials.gov/show/NCT01950390
	Phase 2	Bevacizumab in Treating Patients With Recurrent or Progressive Meningiomas	Acoustic Schwannoma|Adult Anaplastic Meningioma|Adult Ependymoma|Adult Grade I Meningioma|Adult Grade II Meningioma|Adult Meningeal Hemangiopericytoma|Adult Papillary Meningioma|Neurofibromatosis Type 1|Neurofibromatosis Type 2|Recurrent Adult Brain Tumor	Biological: bevacizumab	Northwestern University		Interventional	https://ClinicalTrials.gov/show/NCT01125046
	Phase 2	Bevacizumab for Symptomatic Vestibular Schwannoma in Neurofibromatosis Type 2 (NF2)	Acoustic Schwannoma|Neurofibromatosis Type 2	Biological: bevacizumab|Other: laboratory biomarker analysis|Procedure: quality-of-life assessment	National Cancer Institute (NCI)		Interventional	https://ClinicalTrials.gov/show/NCT01207687
	Phase 1|Phase 2	Vascular Targeted Photodynamic Therapy T1a Renal Tumours	Renal Cancer	Drug: Light activated WST11	University of Oxford|Steba Biotech S.A.		Interventional	https://ClinicalTrials.gov/show/NCT01573156
	Phase 1|Phase 2	Investigational Drug in Combination With Two Chemotherapy Drugs in Women With Locally Recurrent or Metastatic Breast Cancer	Breast Cancer|Metastatic Breast Cancer|Stage IV Breast Cancer	Drug: Ixabepilone|Drug: Capecitabine|Drug: Motesanib	Sidney Kimmel Cancer Center at Thomas Jefferson University|Susan G. Komen Breast Cancer Foundation|Amgen|Thomas Jefferson University		Interventional	https://ClinicalTrials.gov/show/NCT01349088
	Phase 1|Phase 2	PAZOFOS: Phase Ib and Phase II Trial of Pazopanib +/- Fosbretabulin in Advanced Recurrent Ovarian Cancer	Ovarian Neoplasms|Neoplasms, Ovarian|Ovarian Cancer	Drug: Pazopanib|Drug: Fosbretabulin	Heather Driscoll|Novartis|Mateon Therapeutics|East and North Hertfordshire NHS Trust|The Christie NHS Foundation Trust		Interventional	https://ClinicalTrials.gov/show/NCT02055690
	Phase 1|Phase 2	RAD001, FOLFOX and Bevacizumab in Treatment of Colorectal Carcinoma	Colorectal Cancer	Drug: RAD001|Drug: FOLFOX|Drug: Bevacizumab	University of Utah|Novartis		Interventional	https://ClinicalTrials.gov/show/NCT01047293
	Phase 1|Phase 2	BNC105P Combination Study in Partially Platinum Sensitive Ovarian Cancer Patients	Ovarian Cancer	Drug: Carboplatin|Drug: Gemcitabine|Drug: Carboplatin|Drug: Gemcitabine|Drug: BNC105P	Hoosier Cancer Research Network|University of Sydney|Australia New Zealand Gynaecological Oncology Group|Bionomics Limited		Interventional	https://ClinicalTrials.gov/show/NCT01624493
	Phase 1|Phase 2	A Phase I/II Trial of Crolibulin (EPC2407) Plus Cisplatin in Adults With Solid Tumors With a Focus on Anaplastic Thyroid Cancer (ATC)	Solid Tumor|Anaplastic Thyroid Cancer	Drug: Crolibulin|Drug: Cisplatin	National Cancer Institute (NCI)|National Institutes of Health Clinical Center (CC)		Interventional	https://ClinicalTrials.gov/show/NCT01240590
	Phase 1|Phase 2	Preoperative Combination of Letrozole, Everolimus, and TRC105 in Postmenopausal Hormone-Receptor Positive and Her2 Negative Breast Cancer	Breast Cancer	Drug: Letrozole|Drug: Everolimus|Drug: TRC105	University of Alabama at Birmingham|Novartis Pharmaceuticals|Tracon Pharmaceuticals Inc.		Interventional	https://ClinicalTrials.gov/show/NCT02520063
	Phase 1|Phase 2	Exploratory Clinical Study of Apatinib and SHR-1210 in Treating Advanced Hepatocellular Carcinoma or Gastric Cancer	Gastric Cancer|Hepatocellular Carcinoma	Drug: apatinib|Drug: SHR-1210	The Affiliated Hospital of the Chinese Academy of Military Medical Sciences		Interventional	https://ClinicalTrials.gov/show/NCT02942329
	Phase 1|Phase 2	Salvage Chemotherapy for Poor Prognosis Germ Cell Tumors	Germ Cell Tumor	Drug: Bevacizumab|Drug: ICE chemotherapy regimen	Assistance Publique - HÃ´pitaux de Paris		Interventional	https://ClinicalTrials.gov/show/NCT01966913
	Phase 1|Phase 2	Phase Ib/II Study Evaluating Orteronel (Without Prednisone) Combined With Itraconazole In Men With Castration-Resistant Prostate Cancer (CRPC)	Prostate Cancer|Castration-resistant Prostate Cancer	Drug: Itraconazole|Drug: Orteronel	Emmanuel Antonarakis, MD|Millennium Pharmaceuticals, Inc.|Johns Hopkins University		Interventional	https://ClinicalTrials.gov/show/NCT02054793
	Phase 1|Phase 2	A Study of Chimeric Antigen Receptor T Cells Combined With Interventional Therapy in Advanced Liver Malignancy	Carcinoma, Hepatocellular|Pancreatic Cancer Metastatic|Colorectal Cancer Metastatic	Drug: CAR-T cell	Shanghai GeneChem Co., Ltd.|Shanghai Cancer Hospital, China		Interventional	https://ClinicalTrials.gov/show/NCT02959151
	Phase 1|Phase 2	A Dose Finding Study Followed by a Safety and Efficacy Study in Patients With Advanced Solid Tumors or Multiple Myeloma With FGF/FGFR-Related Abnormalities	Solid Tumors|Multiple Myeloma	Drug: TAS-120	Taiho Oncology, Inc.		Interventional	https://ClinicalTrials.gov/show/NCT02052778
	Phase 1|Phase 2	Near-infrared Image Guided Surgery in Pancreatic Adenocarcinoma	Pancreatic Cancer|Pancreatic Adenocarcinoma	Drug: Bevacizumab-800CW	University Medical Center Groningen|Leiden University Medical Center		Interventional	https://ClinicalTrials.gov/show/NCT02743975
	Phase 1|Phase 2	Image Guided Surgery for Margin Assessment of Head and Neck Cancer Using Cetuximab-IRDye800CW cONjugate	Head and Neck Squamous Cell Carcinoma|Margin Assessment	Drug: Cetuximab-IRDye800CW	University Medical Center Groningen|UMC Utrecht|Erasmus Medical Center, Rotterdam		Interventional	https://ClinicalTrials.gov/show/NCT03134846
	Phase 1|Phase 2	Phase Ib Study of Fruquintinib in Patients With Metastatic Colorectal Carcinoma	Colorectal Cancer	Drug: fruquintinib	Hutchison Medipharma Limited|Fudan University|Sun Yat-sen University		Interventional	https://ClinicalTrials.gov/show/NCT01975077
	Phase 1|Phase 2	Cabozantinib Plus Docetaxel and Prednisone for Advanced Prostate Cancer	Prostatic Neoplasms	Drug: Cabozantinib|Drug: Docetaxel|Drug: Prednisone	National Cancer Institute (NCI)|National Institutes of Health Clinical Center (CC)		Interventional	https://ClinicalTrials.gov/show/NCT01683994
	Phase 1|Phase 2	A Study of Gemcitabine/Nab-paclitaxel and Radiation Therapy Followed by Surgery in Patients With Advanced Pancreatic Cancer	Pancreatic Cancer	Drug: Gemcitabine|Drug: Nab-paclitaxel|Radiation: Radiation Therapy|Procedure: Surgical Resection	University Health Network, Toronto		Interventional	https://ClinicalTrials.gov/show/NCT02481635
	Phase 1|Phase 2	Radical Lung Radiotherapy Plus Nelfinavir	Lung Cancer	Drug: nelfinavir|Radiation: Radical Radiotherapy	Oxford University Hospitals NHS Trust		Interventional	https://ClinicalTrials.gov/show/NCT01447589
	Phase 1|Phase 2	Study of Gemcitabine + PEGPH20 vs Gemcitabine Alone in Stage IV Previously Untreated Pancreatic Cancer	Stage IV Pancreatic Cancer	Drug: Gemcitabine|Drug: PEGPH20+ gemcitabine	Halozyme Therapeutics		Interventional	https://ClinicalTrials.gov/show/NCT01453153
	Phase 1|Phase 2	CAR T Cell Receptor Immunotherapy Targeting VEGFR2 for Patients With Metastatic Cancer	Metastatic Cancer|Metastatic Melanoma|Renal Cancer	Biological: Anti-VEGFR2 CAR CD8 plus PBL|Drug: Cyclophosphamide|Biological: Aldesleukin|Drug: Fludarabine	National Cancer Institute (NCI)|National Institutes of Health Clinical Center (CC)		Interventional	https://ClinicalTrials.gov/show/NCT01218867
	Phase 1|Phase 2	Combination of Bevacizumab and NK Immunotherapy for Recurrent Solid Tumors	Malignant Solid Tumour	Drug: Bevacizumab|Biological: NK immunotherapy	Fuda Cancer Hospital, Guangzhou|Shenzhen Hank Bioengineering Institute		Interventional	https://ClinicalTrials.gov/show/NCT02857920
	Phase 1|Phase 2	Phase I/II Study of the Anti-Programmed Death Ligand-1 Antibody MEDI4736 in Combination With Olaparib and/or Cediranib for Advanced Solid Tumors and Advanced or Recurrent Ovarian, Triple Negative Breast, Lung, Prostate and Colorectal Cancers	Lung Cancer|Breast Cancer|Ovarian Cancer|Colorectal Cancer|Prostate Cancer|Triple Negative Breast Cancer	Drug: Olaparib|Drug: Cediranib|Drug: MEDI4736	National Cancer Institute (NCI)|National Institutes of Health Clinical Center (CC)		Interventional	https://ClinicalTrials.gov/show/NCT02484404
	Phase 1|Phase 2	Phase I/II Bevacizumab Versus Bevacizumab Plus TPI 287 for Recurrent Glioblastoma	Brain Neoplasms|Central Nervous System Neoplasms	Drug: TPI287|Drug: Bevacizumab	M.D. Anderson Cancer Center|Cortice Biosciences, Inc.		Interventional	https://ClinicalTrials.gov/show/NCT01582152
	Phase 1|Phase 2	Sorafenib and TRC105 in Hepatocellular Cancer	Hepatoma|Liver Neoplasms|Adenoma, Liver Cell|Carcinoma, Hepatocellular|Liver Neoplasms, Experimental	Drug: TRC 105|Drug: Sorafenib	National Cancer Institute (NCI)|National Institutes of Health Clinical Center (CC)		Interventional	https://ClinicalTrials.gov/show/NCT01306058
	Phase 1|Phase 2	Nintedanib and Capecitabine in Treating Patients With Refractory Metastatic Colorectal Cancer	Colon Adenocarcinoma|Rectal Adenocarcinoma|Recurrent Colon Carcinoma|Recurrent Rectal Carcinoma|Stage IVA Colon Cancer|Stage IVA Rectal Cancer|Stage IVB Colon Cancer|Stage IVB Rectal Cancer	Drug: Capecitabine|Other: Laboratory Biomarker Analysis|Drug: Nintedanib|Other: Pharmacological Study	Roswell Park Cancer Institute|National Cancer Institute (NCI)|Boehringer Ingelheim|National Comprehensive Cancer Network		Interventional	https://ClinicalTrials.gov/show/NCT02393755
	Phase 1|Phase 2	Thoracic Surgery Extended Low-Molecular Weight Heparin VTE Prophylaxis--Pilot Trial	Venous Thromboembolism|Lung Neoplasms|Pulmonary Embolism	Drug: LMWH: Dalteparin|Other: Placebo	McMaster University|University Health Network, Toronto|Trillium Health Partners		Interventional	https://ClinicalTrials.gov/show/NCT02334007
	Phase 1|Phase 2	Serial mpMRI (Multi Parametric Magnetic Resonance Imaging) Scanning in Prostate Cancer After Androgen Deprivation Therapy and RadioTherapy	Prostate Cancer	Device: mpMRI/VERDICT|Radiation: External Beam Radiotherapy	University College, London		Interventional	https://ClinicalTrials.gov/show/NCT02721784
	Phase 1|Phase 2	Allogeneic Tumor Cell Vaccination With Oral Metronomic Cytoxan in Patients With High-Risk Neuroblastoma	Neuroblastoma	Biological: Neuroblastoma Vaccine (unmodified SKNLP, with gene-modified SJNB-JF-IL2 and SJNB-JF-LTN neuroblastoma cells)|Drug: Cytoxan (Cyclophosphamide)	Baylor College of Medicine|Texas Children's Hospital|Center for Cell and Gene Therapy, Baylor College of Medicine		Interventional	https://ClinicalTrials.gov/show/NCT01192555
	Phase 1|Phase 2	Airway and/or Pulmonary Vessels Transplantation	Lung Cancer|Tracheal Neoplasm|Tracheal Stenosis	Procedure: Airway and/or pulmonary Vessels Transplantation	Assistance Publique - HÃ´pitaux de Paris		Interventional	https://ClinicalTrials.gov/show/NCT01331863
	Phase 1|Phase 2	Control of Emergence Blood Pressure During Craniotomy for Tumor Surgery Between Labetolol and Diltiazem	Hypertension|Craniotomy	Drug: Diltiazem|Drug: Labetalol	Mahidol University		Interventional	https://ClinicalTrials.gov/show/NCT01408524
	Phase 1|Phase 2	Pralatrexate + Romidepsin in Relapsed/Refractory Lymphoid Malignancies	Lymphoid Malignancies|Multiple Myeloma|Lymphoma|Hodgkin Lymphoma|Non-hodgkin Lymphoma	Drug: Pralatrexate|Drug: Romidepsin	Jennifer Amengual|Columbia University		Interventional	https://ClinicalTrials.gov/show/NCT01947140
	Phase 1|Phase 2	Single-Arm Open-Label Multicenter Study of VB-111 in Patients With Recurrent Glioblastoma Multiforme	Glioblastoma Multiforme	Drug: VB-111|Drug: Bevacizumab	Vascular Biogenics Ltd. operating as VBL Therapeutics		Interventional	https://ClinicalTrials.gov/show/NCT01260506
	Phase 1|Phase 2	A Study to Evaluate Sildenafil for the Treatment of Lymphatic Malformations	Lymphangioma	Drug: Sildenafil	Stanford University		Interventional	https://ClinicalTrials.gov/show/NCT01290484
	Phase 1|Phase 2	A Study of GPC3 Redirected Autologous T Cells for Advanced HCC	Carcinoma, Hepatocellular	Drug: TAI-GPC3-CART cells	Shanghai GeneChem Co., Ltd.		Interventional	https://ClinicalTrials.gov/show/NCT02715362
	Phase 1|Phase 2	BI-1206 and an Anti-CD20 Antibody in Patients With CD32b Positive B-cell Lymphoma or Leukaemia	B-cell Lymphoma|Chronic Lymphocytic Leukaemia|WaldenstrÃ¶m Macroglobulinaemia	Biological: BI-1206 single agent dose escalation phase|Biological: BI-1206 single agent expansion phase|Biological: Combination of BI-1206 with Rituximab	Cancer Research UK		Interventional	https://ClinicalTrials.gov/show/NCT02933320
	Phase 1|Phase 2	Study of ARQ 092 in Patients With Overgrowth Diseases and Vascular Anomalies	Proteus Syndrome|PIK3CA-Related Overgrowth Spectrum (PROS)|Growth Disorders	Drug: ARQ 092	ArQule		Interventional	https://ClinicalTrials.gov/show/NCT03094832
	Phase 1|Phase 2	A Study of E7080 Alone, and in Combination With Everolimus in Subjects With Unresectable Advanced or Metastatic Renal Cell Carcinoma Following One Prior Vascular Endothelial Growth Factor (VEGF)-Targeted Treatment	Metastatic Renal Cell Carcinoma	Drug: Lenvatinib|Drug: Everolimus	Eisai Inc.		Interventional	https://ClinicalTrials.gov/show/NCT01136733
	Phase 1|Phase 2	Pazopanib Hydrochloride and Bevacizumab in Treating Patients With Previously Untreated Metastatic Kidney Cancer	Clear Cell Renal Cell Carcinoma|Stage IV Renal Cell Cancer	Biological: Bevacizumab|Other: Laboratory Biomarker Analysis|Drug: Pazopanib Hydrochloride|Other: Pharmacological Study	Roswell Park Cancer Institute|National Cancer Institute (NCI)|GlaxoSmithKline		Interventional	https://ClinicalTrials.gov/show/NCT01684397
	Phase 1|Phase 2	Dose-Finding of Propranolol in Combination With Metronomic Fixed Oral Cyclophosphamide Based on Bivariate Efficacy-tolerability Outcome in Patients With Locally Advanced or Metastatic Angiosarcoma: A Collaborative and Innovative Phase I-II Sequential Trial by the French Sarcoma Group (GSF/GETO)	Angiosarcoma	Drug: PROPRANOLOL	Assistance Publique Hopitaux De Marseille		Interventional	https://ClinicalTrials.gov/show/NCT02732678
	Phase 1|Phase 2	A Study of hLL1-DOX (Milatuzumab-Doxorubicin Antibody-Drug Conjugate) in Patients With Multiple Myeloma	Multiple Myeloma	Drug: hLL1-DOX (the doxorubicin conjugate of milatuzumab)	Immunomedics, Inc.		Interventional	https://ClinicalTrials.gov/show/NCT01101594
	Phase 1|Phase 2	Antimicrobial Solution or Saline Solution in Maintaining Catheter Patency and Preventing Catheter-Related Blood Infections in Patients With Malignancies	Chronic Myeloproliferative Disorders|Infection|Leukemia|Lymphoma|Lymphoproliferative Disorder|Multiple Myeloma and Plasma Cell Neoplasm|Myelodysplastic Syndromes|Myelodysplastic/Myeloproliferative Neoplasms|Unspecified Adult Solid Tumor, Protocol Specific	Drug: Edetate Calcium Disodium|Drug: Ethanol|Drug: Trimethoprim-sulfamethoxazole|Other: Hypertonic Saline	M.D. Anderson Cancer Center|National Cancer Institute (NCI)		Interventional	https://ClinicalTrials.gov/show/NCT01101412
	Phase 1|Phase 2	Isatuximab Single Agent Study in Japanese Relapsed AND Refractory Multiple Myeloma Patients	Multiple Myeloma	Drug: Isatuximab SAR650984	Sanofi		Interventional	https://ClinicalTrials.gov/show/NCT02812706
	Phase 1|Phase 2	Safety and Efficacy Study of Gene Therapy Drug (Neovasculgen) to Treat Secondary Raynaud's Phenomenon	Secondary Raynaud's Phenomenon	Drug: Neovasculgen	Human Stem Cell Institute, Russia|Russian Academy of Medical Sciences		Interventional	https://ClinicalTrials.gov/show/NCT02356809
	Phase 1|Phase 2	A Single Agent Study to Evaluate the Overall Response Rate, Safety and Tolerability of Orally Administered Vemurafenib	Multiple Myeloma	Drug: Vermurafenib	University of Arkansas		Interventional	https://ClinicalTrials.gov/show/NCT02115035
	Phase 1|Phase 2	Lipotecan Based Concurrent Chemoradiotherapy in Hepatocellular Carcinoma With Portal Vein Tumor Thrombosis	HepatoCellular Carcinoma|Portal Vein Tumor Thrombosis	Drug: Lipotecan	Taiwan Liposome Company		Interventional	https://ClinicalTrials.gov/show/NCT03035006
	Phase 1|Phase 2	Ublituximab in Combination With Lenalidomide in Patients With B-Cell Lymphoid Malignancies	Non-Hodgkins Lymphoma|Chronic Lymphocytic Leukemia|Small Lymphocytic Lymphoma|B-cell Lymphomas|Marginal Zone Lymphoma|Mantle Cell Lymphoma|Waldenstrom's Macroglobulinemia	Drug: Ublituximab|Drug: Lenalidomide	TG Therapeutics, Inc.		Interventional	https://ClinicalTrials.gov/show/NCT01744912
	Phase 1|Phase 2	ACP-196 (Acalabrutinib) in Combination With Pembrolizumab, for Treatment of Hematologic Malignancies	Non-hodgkin Lymphoma|Multiple Myeloma|Hodgkin Lymphoma|Chronic Lymphocytic Leukemia|Richter's Syndrome|Waldenstrom Macroglobulinemia	Drug: Acalabrutinib|Drug: Pembrolizumab	Acerta Pharma BV|Merck Sharp & Dohme Corp.		Interventional	https://ClinicalTrials.gov/show/NCT02362035
	Phase 1|Phase 2	Study to Assess Safety, Pharmacokinetics, and Efficacy of Oral CC-223 for Patients With Advanced Solid Tumors, Non-Hodgkin Lymphoma or Multiple Myeloma	Multiple Myeloma|Diffuse Large B-Cell Lymphoma|Glioblastoma Multiforme|Hepatocellular Carcinoma|Non-Small Cell Lung Cancer|Neuroendocrine Tumors of Non-Pancreatic Origin|Hormone Receptor-Positive Breast Cancer	Drug: CC-223	Celgene		Interventional	https://ClinicalTrials.gov/show/NCT01177397
	Phase 1|Phase 2	Sequential Trial on Reduced Intensity Conditioning (RIC) Allogeneic Transplantation	Hematologic Malignancies|Multiple Myeloma	Drug: Bz (Bortezomib)|Drug: Len (lenalidomide)	European Myeloma Network		Interventional	https://ClinicalTrials.gov/show/NCT01460420
	Phase 1|Phase 2	ABC294640 in Refractory / Relapsed Multiple Myeloma	Multiple Myeloma	Drug: ABC294640	RedHill Biopharma Limited|Apogee Biotechnology Corporation|Duke University|National Cancer Institute (NCI)		Interventional	https://ClinicalTrials.gov/show/NCT02757326
	Phase 1|Phase 2	Infliximab Therapy for Dolichoectactic Vertebrobasilar Aneurysms	Aneurysm|Stroke|Vasculitis|Tumor Necrosis Factor-alpha	Drug: Infliximab	University of California, San Francisco		Interventional	https://ClinicalTrials.gov/show/NCT02638701
	Phase 1|Phase 2	A Study of Ixazomib Administered in Combination With Lenalidomide and Low-Dose Dexamethasone in Patients With Newly Diagnosed Multiple Myeloma	Multiple Myeloma	Drug: Ixazomib|Drug: Lenalidomide|Drug: Dexamethasone	Millennium Pharmaceuticals, Inc.|Takeda		Interventional	https://ClinicalTrials.gov/show/NCT01217957
	Phase 1|Phase 2	ACP-196 in Combination With ACP-319, for Treatment of B-Cell Malignancies	Non-hodgkins Lymphoma|Multiple Myeloma|B-All	Drug: ACP-196 and ACP-319|Drug: ACP-196 and ACP-319	Acerta Pharma BV		Interventional	https://ClinicalTrials.gov/show/NCT02328014
	Phase 1|Phase 2	Combined Alternating Sunitinib and Bevacizumab (AvastinÂ®) in Advanced Renal Cell Carcinoma (CASA)	Renal Cell Carcinoma	Drug: Sunitinib|Drug: Bevacizumab	King Faisal Specialist Hospital & Research Center		Interventional	https://ClinicalTrials.gov/show/NCT02919371
	Phase 1|Phase 2	Safety, PK, PD, and Antitumor Activity of SNS-062 in B Lymphoid Cancers	Chronic Lymphocytic Leukemia|Small Lymphocytic Lymphoma|Lymphoplasmacytoid Lymphoma|Mantle-Cell Lymphoma|Waldenstrom Macroglobulinemia	Drug: SNS-062	Sunesis Pharmaceuticals		Interventional	https://ClinicalTrials.gov/show/NCT03037645
	Phase 1|Phase 2	Open-label Study of the Safety and Activity of Oprozomib in Patients With Hematologic Malignancies	Multiple Myeloma|Waldenstrom Macroglobulinemia	Drug: oprozomib	Amgen		Interventional	https://ClinicalTrials.gov/show/NCT01416428
	Phase 1|Phase 2	Open-Label, Dose-Escalation Study of INCB054828 in Subjects With Advanced Malignancies	Malignant Solid Tumour|Carcinoma, Non-Small-Cell Lung|Stomach Neoplasms|Urothelial Carcinoma|Endometrial Neoplasms|Multiple Myeloma|MPN|Breast Cancer|Cholangiocarcinoma	Drug: INCB054828|Drug: Gemcitabine+Cisplatin|Drug: Pembrolizumab|Drug: Docetaxel	Incyte Corporation		Interventional	https://ClinicalTrials.gov/show/NCT02393248
	Phase 1|Phase 2	Study of Carfilzomib for Multiple Myeloma Patients Who Are Relapsed/Refractory to Bortezomib-containing Treatments	Multiple Myeloma	Drug: Group A: Carfilzomib & Non-IMiD Regimen|Drug: Group B: Carfilzomib & IMiD containing regimen.	Oncotherapeutics|Amgen		Interventional	https://ClinicalTrials.gov/show/NCT01365559
	Phase 1|Phase 2	Safety of Simvastatin in LAM and TSC	Lymphangioleiomyomatosis|Tuberous Sclerosis Complex	Drug: Simvastatin	University of Pennsylvania|The LAM Foundation		Interventional	https://ClinicalTrials.gov/show/NCT02061397
	Phase 1|Phase 2	A Evaluation of the Safety of Oncocort IV Pegylated Liposomal Dexamethasone Phosphate in Patients With Progressive Multiple Myeloma	Multiple Myeloma	Drug: Dexamethasone	Enceladus Pharmaceuticals BV|University Hospital, Aachen|Accelovance		Interventional	https://ClinicalTrials.gov/show/NCT03033316
	Phase 1|Phase 2	Phase I/II Trial of the Combination of Lenalidomide (Revlimid) and Nab-paclitaxel (Abraxane) in the Treatment of Relapsed/Refractory Multiple Myeloma	Relapsed or Refractory Multiple Myeloma	Drug: Lenalidomide|Drug: nab-paclitaxel	New York University School of Medicine|Celgene Corporation		Interventional	https://ClinicalTrials.gov/show/NCT02075021
	Phase 1|Phase 2	Dasatinib for Immune Modulation After Donor Stem Cell Transplant for Hematologic Malignancies	Non-Hodgkin's Lymphoma|Hodgkin's Lymphoma|Myeloid Leukemia|Multiple Myeloma|Myelodysplastic Syndrome|Lymphoid Leukemia	Drug: Dasatinib|Other: laboratory biomarker analysis	Barbara Ann Karmanos Cancer Institute|National Cancer Institute (NCI)		Interventional	https://ClinicalTrials.gov/show/NCT01643603
	Phase 1|Phase 2	Effect of AT7519M Alone and AT7519M Plus Bortezomib in Patients With Previously Treated Multiple Myeloma	Multiple Myeloma	Drug: AT7519M|Drug: Bortezomib	Astex Pharmaceuticals|Multiple Myeloma Research Consortium		Interventional	https://ClinicalTrials.gov/show/NCT01183949
	Phase 1|Phase 2	A Study of Weekly Carfilzomib in Combination With Dexamethasone for Progressive Multiple Myeloma (CHAMPION 1)	Multiple Myeloma	Drug: carfilzomib	Amgen		Interventional	https://ClinicalTrials.gov/show/NCT01677858
	Phase 1|Phase 2	A Study of Apatinib for Advanced Hepatocellular Carcinoma Patients After First-line Treatment Failure	Hepatocellular Carcinoma	Drug: Apatinib Mesylate Tablets	The First Affiliated Hospital of Zhengzhou University		Interventional	https://ClinicalTrials.gov/show/NCT02772029
	Phase 1|Phase 2	Oral ONC201 in Relapsed/Refractory Multiple Myeloma	Multiple Myeloma	Drug: ONC201	Oncoceutics, Inc.		Interventional	https://ClinicalTrials.gov/show/NCT02863991
	Phase 1|Phase 2	Daratumumab in Combination With ATRA	Multiple Myeloma	Drug: all-trans retinoic acid (ATRA)	VU University Medical Center|EMC Rotterdam|UMC Utrecht|Vejle Hospital and University of Southern Denmark|Department of Medical Sciences, University of Torino		Interventional	https://ClinicalTrials.gov/show/NCT02751255
	Phase 1|Phase 2	Veliparib, Bendamustine Hydrochloride, and Rituximab in Treating Patients With Relapsed or Refractory Lymphoma, Multiple Myeloma, or Solid Tumors	Adult B Acute Lymphoblastic Leukemia|Adult Nasal Type Extranodal NK/T-Cell Lymphoma|Adult Solid Neoplasm|Anaplastic Large Cell Lymphoma|Angioimmunoblastic T-Cell Lymphoma|Chronic Lymphocytic Leukemia|Cutaneous B-Cell Non-Hodgkin Lymphoma|Extranodal Marginal Zone Lymphoma of Mucosa-Associated Lymphoid Tissue|Hepatosplenic T-Cell Lymphoma|Intraocular Lymphoma|Lymphomatous Involvement of Non-Cutaneo…	Drug: Bendamustine Hydrochloride|Other: Pharmacological Study|Biological: Rituximab|Drug: Veliparib	National Cancer Institute (NCI)		Interventional	https://ClinicalTrials.gov/show/NCT01326702
	Phase 1|Phase 2	Pomalidomide for Kaposi Sarcoma in People With or Without HIV	Kaposi Sarcoma|Sarcoma, Kaposi	Drug: Pomalidomide	National Cancer Institute (NCI)|National Institutes of Health Clinical Center (CC)		Interventional	https://ClinicalTrials.gov/show/NCT01495598
	Phase 1|Phase 2	Phase 1-2 Amrubicin in Combo With Lenalidomide + Weekly Dexamethasone in Relapsed/Refractory Multiple Myeloma	Multiple Myeloma	Drug: Amrubicin|Drug: Lenalidomide|Drug: Dexamethasone|Drug: Aspirin|Drug: Pegfilgrastim	Michaela Liedtke|Celgene Corporation|Stanford University		Interventional	https://ClinicalTrials.gov/show/NCT01355705
	Phase 1|Phase 2	A Study of KW-2478 in Combination With Bortezomib in Subjects With Relapsed and/or Refractory Multiple Myeloma	Multiple Myeloma	Drug: KW-2478|Drug: Bortezomib	Kyowa Hakko Kirin Pharma, Inc.|Kyowa Hakko Kirin Co., Ltd|Kyowa Kirin Pharmaceutical Development, Inc.		Interventional	https://ClinicalTrials.gov/show/NCT01063907
	Phase 1|Phase 2	Study of the Safety and Effectiveness of LGH447 and BYL719 in Patients With Relapsed and Refractory Multiple Myeloma	Relapsed and Refractory Multiple Myeloma	Drug: LGH447|Drug: BYL719	Novartis Pharmaceuticals|Novartis		Interventional	https://ClinicalTrials.gov/show/NCT02144038
	Phase 1|Phase 2	Dasatinib for Modulating Immune System After Autologous Stem Cell Transplants for Multiple Myeloma, Non-Hodgkin, or Hodgkin Lymphoma	Non-Hodgkin's Lymphoma|Multiple|Mycosis Fungoides|Hodgkin's Lymphoma|Multiple Myeloma	Drug: Dasatinib	Barbara Ann Karmanos Cancer Institute|National Cancer Institute (NCI)		Interventional	https://ClinicalTrials.gov/show/NCT01609816
	Phase 1|Phase 2	Phase 1-2 Study of Total Bone Marrow Irradiation With Helicoidal Tomotherapy in 1st Myeloma Relapse	Multiple Myeloma in Relapse	Drug: Melphalan|Biological: Autologous Hematopoietic Stem cell	Institut Cancerologie de l'Ouest		Interventional	https://ClinicalTrials.gov/show/NCT01794572
	Phase 1|Phase 2	Safety and Efficacy of POL6326 for Mobilization/Transplant of Sibling Donor in Patients With Hematologic Malignancies	Acute Myeloid Leukemia in Remission|Adult Acute Lymphoblastic Leukemia in Remission|Chronic Myelogenous Leukemia (CML)|Non-Hodgkin's Lymphoma (NHL) or Hodgkin's Disease (HD) in 2nd or Greater Complete Remission, Partial Remission|Chronic Lymphocytic Leukemia (CLL)|Multiple Myeloma (MM)|Myelodysplastic Syndrome (MDS)|Myeloproliferative Disorders	Drug: POL6326|Procedure: Leukapheresis|Procedure: PBSC Transplant	Polyphor Ltd.		Interventional	https://ClinicalTrials.gov/show/NCT01413568
	Phase 1|Phase 2	Bendamustine in Combination With Bortezomib and Pegylated Liposomal Doxorubicin for Multiple Myeloma	Multiple Myeloma	Drug: Bendamustine|Drug: Doxorubicin|Drug: Bortezomib|Drug: Bendamustine|Drug: Filgrastim	Sherif Farag, MB, BS|Hoosier Cancer Research Network|Cephalon		Interventional	https://ClinicalTrials.gov/show/NCT01177683
	Phase 1|Phase 2	ACY-1215 (Ricolinostat) in Combination With Pomalidomide and Low-dose Dex in Relapsed-and-Refractory Multiple Myeloma	Multiple Myeloma	Drug: ACY-1215 (Ricolinostat) in combination with pomalidomide and dexamethasone	Celgene		Interventional	https://ClinicalTrials.gov/show/NCT01997840
	Phase 1|Phase 2	Delanzomib (CEP-18770) in Combination With Lenalidomide and Dexamethasone in Relapsed or Refractory Multiple Myeloma	Multiple Myeloma	Drug: CEP-18770|Drug: Lenalidomide|Drug: Dexamethasone	Cephalon|Teva Pharmaceutical Industries		Interventional	https://ClinicalTrials.gov/show/NCT01348919
	Phase 1|Phase 2	Phase I/II Carfilzomib Plus Lenalidomide and Rituximab in the Treatment of Relapsed/Refractory Mantle Cell Lymphoma	Lymphoma	Drug: Carfilzomib|Drug: Lenalidomide|Drug: Rituximab	M.D. Anderson Cancer Center|Celgene|Onyx Therapeutics, Inc.		Interventional	https://ClinicalTrials.gov/show/NCT01729104
	Phase 1|Phase 2	A Phase 2 Trial of MP0250 Plus Bortezomib + Dexamethasone in Patients With Multiple Myeloma	Multiple Myeloma in Relapse	Biological: MP0250 plus BOR+DEX	Molecular Partners AG		Interventional	https://ClinicalTrials.gov/show/NCT03136653
	Phase 1|Phase 2	Revlimid, Endoxan, Prednison Evaluation After Prior Revlimid Treatment (REPEAT)	Multiple Myeloma	Drug: Lenalidomide, endoxan, prednisone|Drug: lenalidomide, endoxan, prednisone	UMC Utrecht|Celgene Corporation		Interventional	https://ClinicalTrials.gov/show/NCT01352338
	Phase 1|Phase 2	Lenalidomide and High Dose Melphalan Followed by Autologous Stem Cell Transplant in Multiple Myeloma	Multiple Myeloma	Drug: Lenalidomide plus Melphalan during autologous stem cell transplantation|Drug: Lenalidomide maintenance	Attaya Suvannasankha|Celgene|Indiana University		Interventional	https://ClinicalTrials.gov/show/NCT01142232
	Phase 1|Phase 2	Lenalidomide Plus Melphalan as a Preparative Regimen for Autologous Stem Cell Transplantation in Relapsed Multiple Myeloma: A Phase 1 / 2 Study	Multiple Myeloma	Drug: lenalidomide|Drug: melphalan	Weill Medical College of Cornell University|Celgene		Interventional	https://ClinicalTrials.gov/show/NCT01054196
	Phase 1|Phase 2	A Safety Study to Determine Dose and Tolerability of CC-220 Monotherapy and in Combination With Dexamethasone in Subjects With Relapsed and Refractory Multiple Myeloma	Multiple Myeloma	Drug: CC-220|Drug: Dexamethasone	Celgene		Interventional	https://ClinicalTrials.gov/show/NCT02773030
	Phase 1|Phase 2	Safety and Efficacy of Melflufen and Dexamethasone in Relapsed and/or Relapsed-Refractory Multiple Myeloma Patients	Relapsed and/or Relapsed-refractory Multiple Myeloma	Drug: Melflufen|Drug: Dexamethasone	Oncopeptides AB		Interventional	https://ClinicalTrials.gov/show/NCT01897714
	Phase 1|Phase 2	Phase 1b/2, Multicenter, Open-label Study of Oprozomib and Dexamethasone in Patients With Relapsed and/or Refractory Multiple Myeloma	Multiple Myeloma	Drug: Oprozomib|Drug: Dexamethasone	Amgen		Interventional	https://ClinicalTrials.gov/show/NCT01832727
	Phase 1|Phase 2	Carfilzomib + High Dose Melphalan as Preparative Regimen for Autologous Hematopoietic Stem Cell Transplantation	Multiple Myeloma	Drug: Carfilzomib|Drug: Melphalan	University of Alabama at Birmingham|Amgen		Interventional	https://ClinicalTrials.gov/show/NCT01690143
	Phase 1|Phase 2	Study of Pomalidomide and Dexamethasone With Growth Factor Support in Patients With Relapsed/Refractory Multiple Myeloma	Myeloma	Drug: Pomalidomide|Drug: Dexamethasone|Drug: G-CSF|Behavioral: Phone Calls	M.D. Anderson Cancer Center|Celgene		Interventional	https://ClinicalTrials.gov/show/NCT01946152
	Phase 1|Phase 2	Safety and Tolerability of HSC835 in Patients Undergoing Single Umbilical Cord Blood Transplant	Single Umbilical Cord Blood Transplantation|Non-myeloablative Conditioning|Acute Myelocytic Leukemia|Acute Lymphocytic Leukemia|Chronic Myelogenous Leukemia|Myelodysplastic Syndrome|Chronic Lymphocytic Leukemia|Marginal Zone Lymphoma|Follicular Lymphomas|Large-cell Lymphoma|Hodgkin Lymphoma|Multiple Myeloma|Lymphoblastic Lymphoma|Burkitt's Lymphoma|Mantle-cell Lymphoma|Lymphoplasmacytic Lymphoma|…	Drug: HSC835	Novartis Pharmaceuticals|Novartis		Interventional	https://ClinicalTrials.gov/show/NCT01930162
	Phase 1|Phase 2	Study of the Combination of Panobinostat and Carfilzomib in Patients With Relapsed/Refractory Multiple Myeloma	Multiple Myeloma	Drug: carfilzomib and panobinostat	SCRI Development Innovations, LLC|Onyx Therapeutics, Inc.|Novartis		Interventional	https://ClinicalTrials.gov/show/NCT01496118
	Phase 1|Phase 2	T-Regulatory Cell and CD3 Depleted Double Umbilical Cord Blood Transplantation in Hematologic Malignancies	Hematologic Malignancy|Acute Myeloid Leukemia|Acute Lymphocytic Leukemia|Chronic Myelogenous Leukemia in Blast Crisis|Anemia, Refractory, With Excess of Blasts|Chronic Myeloproliferative Disease|Chronic Lymphocytic Leukemia|Small Lymphocytic Lymphoma|Marginal Zone B-cell Lymphoma|Follicular Lymphoma|Lymphoplasmacytic Lymphoma|Mantle-Cell Lymphoma|Prolymphocytic Lymphoma|Large Cell Non-Hodgkin's L…	Biological: Treg cells|Biological: CD3+ Teff cells|Drug: Fludarabine|Drug: Cyclophosphamide|Radiation: Total body irradiation|Biological: Umbilical cord blood transplantation	Masonic Cancer Center, University of Minnesota		Interventional	https://ClinicalTrials.gov/show/NCT01163201
	Phase 1|Phase 2	Pomalidomide, Cyclophosphamide and Prednisone (PCP) in Patients With Multiple Myeloma (MM) Relapsed and/or Refractory to Lenalidomide	Multiple Myeloma	Drug: Pomalidomide, Cyclophosphamide, Prednisone	Fondazione Neoplasie Sangue Onlus		Interventional	https://ClinicalTrials.gov/show/NCT01166113
	Phase 1|Phase 2	Study of Oral IXAZOMIB in Combination With Lenalidomide and Dexamethasone in Patients With Newly Diagnosed Multiple Myeloma	Multiple Myeloma	Drug: IXAZOMIB + Lenalidomide + Dexamethasone	Millennium Pharmaceuticals, Inc.		Interventional	https://ClinicalTrials.gov/show/NCT01383928
	Phase 1|Phase 2	SL-401 in Combination With Pomalidomide and Dexamethasone in Relapsed or Relapsed and Refractory Multiple Myeloma	Multiple Myeloma	Drug: SL-401/ Pomalidomide/ Dexamethasone	Stemline Therapeutics, Inc.		Interventional	https://ClinicalTrials.gov/show/NCT02661022
	Phase 1|Phase 2	Filanesib (ARRY-520) in Combination With Pomalidomide and Dexamethasone for Relapsed/Refractory (R/R) Multiple Myeloma (MM) Patients	Multiple Myeloma	Drug: Filanesib, pomalidomide and dexamethasone	PETHEMA Foundation|Array BioPharma|Celgene Corporation		Interventional	https://ClinicalTrials.gov/show/NCT02384083
	Phase 1|Phase 2	Vorinostat,Lenalinomide and Dexamethasone in Multiple Myeloma Refractory to Previous Lenalinomide Containing Regimens	Multiple Myeloma	Drug: Vorinostat, Lenalinomide and Dexamethasone	Hackensack University Medical Center|Merck Sharp & Dohme Corp.		Interventional	https://ClinicalTrials.gov/show/NCT01502085
	Phase 1|Phase 2	A Study of Carfilzomib, Lenalidomide, Vorinostat, and Dexamethasone in Relapsed and/or Refractory Multiple Myeloma	Multiple Myeloma	Drug: Vorinostat, Lenalidomide, Carfilzomib, Dexamethasone	Hackensack University Medical Center		Interventional	https://ClinicalTrials.gov/show/NCT01297764
	Phase 1|Phase 2	Carfilzomib In Combination With Bendamustine And Dexamethasone In Refractory Or Relapsed Multiple Myeloma	Multiple Myeloma	Drug: Carfilzomib	Stichting Hemato-Oncologie voor Volwassenen Nederland|Fondazione Neoplasie Sangue Onlus		Interventional	https://ClinicalTrials.gov/show/NCT02056756
	Phase 1|Phase 2	Escalating Doses of Thalidomide in Conjunction With Bortezomib and HIgh Dose Melphalan for BSCT	Multiple Myeloma	Drug: Thalidomide+Melphalan +Bortezomib+stem cell transplant	Hackensack University Medical Center|Millennium Pharmaceuticals, Inc.		Interventional	https://ClinicalTrials.gov/show/NCT01242267
	Phase 1|Phase 2	BT062 in Combination With Lenalidomide or Pomalidomide and Dexamethasone in Patients With Multiple Myeloma	Multiple Myeloma	Drug: BT062 , intravenous administration	Biotest Pharmaceuticals Corporation|Biotest		Interventional	https://ClinicalTrials.gov/show/NCT01638936
	Phase 1|Phase 2	A Study of VLX1570 and Dexamethasone in Myeloma Patients	Multiple Myeloma	Drug: VLX1570 and dexamethasone	Vivolux AB		Interventional	https://ClinicalTrials.gov/show/NCT02372240
	Phase 1|Phase 2	Safety, Efficacy, and Pharmacodynamics of a 60-Minute Infusion of Carfilzomib for Progressive Multiple Myeloma	Multiple Myeloma	Drug: Carfilzomib and Dexamethasone	Oncotherapeutics|Amgen		Interventional	https://ClinicalTrials.gov/show/NCT01792102
	Phase 1|Phase 2	A Trial of ASP7487 (OSI-906) in Combination With Bortezomib for the Treatment of Relapsed Multiple Myeloma	Multiple Myeloma	Drug: ASP7487, Velcade, Dexamethasone	University Health Network, Toronto|Multiple Myeloma Research Consortium|Astellas Pharma Inc		Interventional	https://ClinicalTrials.gov/show/NCT01672736
	Phase 1|Phase 2	Study of ACY-1215 Alone and in Combination With Bortezomib and Dexamethasone in Multiple Myeloma	Multiple Myeloma	Drug: ACY-1215	Celgene|The Leukemia and Lymphoma Society		Interventional	https://ClinicalTrials.gov/show/NCT01323751
	Phase 1|Phase 2	Evaluating the Efficacy and Safety of the Lower Dose of Bortezomib Plus Busulfan and Melphalan as a Conditioning Regimen in Patients With Multiple Myeloma Undergoing Autologous Peripheral Blood Stem Cell Transplantation- KMM103 Study	Multiple Myeloma Patients Who Candidate for Autologous Peripheral Blood Stem Cell Transplantation	Drug: Bortezomib	Yonsei University		Interventional	https://ClinicalTrials.gov/show/NCT01255527
	Phase 1|Phase 2	Allo Transplant Followed by Lenalidomide and Sirolimus Maintenance in High-Risk Multiple Myeloma (MM)	Multiple Myeloma	Drug: Sirolimus|Drug: Tacrolimus|Drug: Lenalidomide	Sherif S. Farag|Celgene Corporation|Indiana University		Interventional	https://ClinicalTrials.gov/show/NCT01303965
	Phase 1|Phase 2	Pomalidomide and Dexamethasone With or Without Ixazomib in Treating Patients With Refractory Multiple Myeloma	Multiple Myeloma in Relapse	Drug: pomalidomide|Drug: ixazomib|Drug: dexamethasone	Alliance for Clinical Trials in Oncology|National Cancer Institute (NCI)|Celgene Corporation|Millennium Pharmaceuticals, Inc.		Interventional	https://ClinicalTrials.gov/show/NCT02004275
	Phase 1|Phase 2	Study of Bendamustine and IXAZOMIB (MLN9708) Plus Dexamethasone in Relapsed/Refractory Multiple Myeloma	Multiple Myeloma	Drug: MLN9708|Drug: Dexamethasone|Drug: Bendamustine	Parameswaran Hari|Medical College of Wisconsin		Interventional	https://ClinicalTrials.gov/show/NCT02477215
	Phase 1|Phase 2	Nelfinavir and Lenalidomide/Dexamethasone in Progressive Multiple Myeloma	Multiple Myeloma	Drug: Nelfinavir|Drug: Lenalidomide|Drug: Dexamethasone	Swiss Group for Clinical Cancer Research		Interventional	https://ClinicalTrials.gov/show/NCT01555281
	Phase 1|Phase 2	Pomalidomide in Combination With High Dose Dexamethasone and Oral Cyclophosphamide	Myeloma	Drug: Pomalidomide|Drug: Dexamethasone|Drug: Cyclophosphamide	H. Lee Moffitt Cancer Center and Research Institute|Celgene		Interventional	https://ClinicalTrials.gov/show/NCT01432600
	Phase 1|Phase 2	Bendamustine + Pomalidomide + Dex in R/R Multiple Myeloma	Multiple Myeloma	Drug: Bendamustine|Drug: Pomalidomide|Drug: Dexamethasone	Cristina Gasparetto|Celgene|Duke University		Interventional	https://ClinicalTrials.gov/show/NCT01754402
	Phase 1|Phase 2	Study of Bendamustine, Lenalidomide and Low-dose Dexamethasone, for the Treatment of Patients With Relapsed Myeloma	Multiple Myeloma	Drug: Bendamustine|Drug: Lenalidomide|Drug: Dexamethasone	Gruppo Italiano Studio Linfomi		Interventional	https://ClinicalTrials.gov/show/NCT01686386
	Phase 1|Phase 2	Bendamustine Hydrochloride, Lenalidomide, and Dexamethasone in Treating Patients With Relapsed Multiple Myeloma	Refractory Multiple Myeloma	Drug: bendamustine hydrochloride|Drug: lenalidomide|Drug: dexamethasone	Mayo Clinic		Interventional	https://ClinicalTrials.gov/show/NCT01049945
	Phase 1|Phase 2	Study of Carfilzomib, Cyclophosphamide and Dexamethasone in Newly Diagnosed Multiple Myeloma Patients	Multiple Myeloma	Drug: Carfilzomib|Drug: Cyclophosphamide|Drug: Dexamethasone	Stichting Hemato-Oncologie voor Volwassenen Nederland|Fondazione Neoplasie Sangue Onlus		Interventional	https://ClinicalTrials.gov/show/NCT02204241
	Phase 1|Phase 2	Study of Weekly Carfilzomib, Cyclophosphamide and Dexamethasone In Newly Diagnosed Multiple Myeloma Patients (wCCyd)	Multiple Myeloma	Drug: Carfilzomib|Drug: Cyclophosphamide|Drug: Dexamethasone	Stichting Hemato-Oncologie voor Volwassenen Nederland|Fondazione Neoplasie Sangue Onlus		Interventional	https://ClinicalTrials.gov/show/NCT01857115
	Phase 1|Phase 2	MLN9708 (Ixazomib) in Combination With Panobinostat and Dexamethasone in Multiple Myeloma	Multiple Myeloma|Kahler Disease|Plasma-Cell Myeloma|Myelomatosis	Drug: Panobinostat|Drug: Dexamethasone|Drug: MLN9708	Case Comprehensive Cancer Center		Interventional	https://ClinicalTrials.gov/show/NCT02057640
	Phase 1|Phase 2	High Dose Carfilzomib for Newly Diagnosed Myeloma	Multiple Myeloma	Drug: Carfilzomib|Drug: Lenalidomide|Drug: Dexamethasone	Memorial Sloan Kettering Cancer Center|Onyx/Amgen|Celgene		Interventional	https://ClinicalTrials.gov/show/NCT02937571
	Phase 1|Phase 2	Study of Selinexor (KPT- 330), Lenalidomide, & Dexamethasone in Relapsed/Refractory Multiple Myeloma Patients	Multiple Myeloma	Drug: Selinexor|Drug: Lenalidomide|Drug: Dexamethasone	Karyopharm Therapeutics Inc		Interventional	https://ClinicalTrials.gov/show/NCT02389543
	Phase 1|Phase 2	1454GCC: Anti-PD-1 (MK-3475) and IMiD (Pomalidomide) Combination Immunotherapy in Relapsed/Refractory Multiple Myeloma	Multiple Myeloma	Drug: MK-3475|Drug: Pomalidomide|Drug: Dexamethasone	Ashraf Badros|Merck Sharp & Dohme Corp.|University of Maryland		Interventional	https://ClinicalTrials.gov/show/NCT02289222
	Phase 1|Phase 2	Phase I/II Study of Carfilzomib, Pomalidomide and Dexamethasone in Relapsed And/Or Refractory Multiple Myeloma Patients (CPD)	Multiple Myeloma	Drug: Carfilzomib|Drug: Pomalidomide|Drug: Dexamethasone	Stichting Hemato-Oncologie voor Volwassenen Nederland|University of Turin, Italy		Interventional	https://ClinicalTrials.gov/show/NCT02185820
	Phase 1|Phase 2	A Study of Oprozomib, Pomalidomide, and Dexamethasone in Subjects With Primary Refractory or Relapsed and Refractory Multiple Myeloma	Multiple Myeloma	Drug: Oprozomib|Drug: Pomalidomide|Drug: Dexamethasone	Amgen		Interventional	https://ClinicalTrials.gov/show/NCT01999335
	Phase 1|Phase 2	Study of Pomalidomide, Dexamethasone, and Romidepsin for Rel/Ref Myeloma	Multiple Myeloma	Drug: Romidepsin|Drug: pomalidomide|Drug: Dexamethasone	Weill Medical College of Cornell University|Celgene Corporation		Interventional	https://ClinicalTrials.gov/show/NCT01979276
	Phase 1|Phase 2	Carfilzomib, Pomalidomide, and Dexamethasone in Treating Patients With Relapsed or Refractory Multiple Myeloma	Multiple Myeloma	Drug: pomalidomide|Drug: carfilzomib|Drug: dexamethasone	University of Chicago|National Cancer Institute (NCI)|Multiple Myeloma Research Foundation		Interventional	https://ClinicalTrials.gov/show/NCT01665794
	Phase 1|Phase 2	Pomalidomide, Dexamethasone and Pegylated Liposomal Doxorubicin for Relapsed/Refractory Multiple Myeloma	Multiple Myeloma	Drug: Pomalidomide|Drug: Pegylated Liposomal Doxorubicin (PLD)|Drug: Dexamethasone	Oncotherapeutics|Celgene Corporation		Interventional	https://ClinicalTrials.gov/show/NCT01541332
	Phase 1|Phase 2	A Safety and Efficacy Study of Carfilzomib and Pomalidomide With Dexamethasone in Patients With Relapsed or Refractory Multiple Myeloma	Multiple Myeloma	Drug: Carfilzomib|Drug: Pomalidomide|Drug: Dexamethasone	Academic Myeloma Consortium|Criterium, Inc.|Amgen|Celgene Corporation		Interventional	https://ClinicalTrials.gov/show/NCT01464034
	Phase 1|Phase 2	Carfilzomib With Bendamustine and Dexamethasone in Multiple Myeloma	Multiple Myeloma	Drug: Bendamustine|Drug: Carfilzomib|Drug: Dexamethasone	Suzanne Lentzsch, MD|Columbia University		Interventional	https://ClinicalTrials.gov/show/NCT02002598
	Phase 1|Phase 2	Selinexor (KPT-330) and Liposomal Doxorubicin For Relapsed and Refractory Multiple Myeloma	Multiple Myeloma	Drug: Selinexor|Drug: Liposomal doxorubicin|Drug: Dexamethasone	H. Lee Moffitt Cancer Center and Research Institute|Karyopharm Therapeutics Inc		Interventional	https://ClinicalTrials.gov/show/NCT02186834
	Phase 1|Phase 2	Study of the Bruton's Tyrosine Kinase Inhibitor in Combination With Carfilzomib (Kyprolisâ„¢) in Subjects With Relapsed or Relapsed and Refractory Multiple Myeloma	Multiple Myeloma	Drug: Ibrutinib|Drug: Carfilzomib|Drug: Dexamethasone	Pharmacyclics LLC.		Interventional	https://ClinicalTrials.gov/show/NCT01962792
	Phase 1|Phase 2	Carfilzomib, Pegylated Liposomal Doxorubicin Hydrochloride, and Dexamethasone in Treating Patients With Relapsed or Refractory Multiple Myeloma	Multiple Myeloma	Drug: carfilzomib|Drug: pegylated liposomal doxorubicin (PLD)|Drug: Dexamethasone	Washington University School of Medicine		Interventional	https://ClinicalTrials.gov/show/NCT01246063
	Phase 1|Phase 2	A Study of Oprozomib, Melphalan, and Prednisone in Transplant Ineligible Patients With Newly Diagnosed Multiple Myeloma	Multiple Myeloma	Drug: Oprozomib|Drug: Melphalan|Drug: Prednisone	Amgen		Interventional	https://ClinicalTrials.gov/show/NCT02072863
	Phase 1|Phase 2	Trial of Carfilzomib Plus Melphalan and Prednisone in Elderly Untreated Patients With Multiple Myeloma (CARMYSAP)	Myeloma	Drug: Carfilzomib|Drug: Melphalan|Drug: Prednisone	Nantes University Hospital		Interventional	https://ClinicalTrials.gov/show/NCT01279694
	Phase 1|Phase 2	Study of the Safety, Tolerability and Efficacy of KPT-8602 in Patients With Relapsed/Refractory Multiple Myeloma	Multiple Myeloma	Drug: KPT-8602	Karyopharm Therapeutics Inc		Interventional	https://ClinicalTrials.gov/show/NCT02649790
	Phase 1|Phase 2	CT Antigen TCR-Engineered T Cells for Myeloma	Multiple Myeloma	Drug: Treatment with NY-ESO-1c259-modified T cells	Adaptimmune		Interventional	https://ClinicalTrials.gov/show/NCT01892293
	Phase 1|Phase 2	Cabozantinib (XL184) in Patients With Relapsed or Refractory Myeloma	Relapsed or Refractory Multiple Myeloma	Drug: Cabozantinib (XL184)	Memorial Sloan Kettering Cancer Center|Exelixis		Interventional	https://ClinicalTrials.gov/show/NCT01866293
	Phase 1|Phase 2	Safety, Efficacy and Pharmacokinetic Study of PRLX 93936 in Patients With Multiple Myeloma	Multiple Myeloma	Drug: PRLX 93936	Prolexys Pharmaceuticals		Interventional	https://ClinicalTrials.gov/show/NCT01695590
	Phase 1|Phase 2	Lenalidomide and High-Dose Melphalan	Myeloma|Stem Cell Transplantation	Drug: Lenalidomide|Drug: Melphalan|Procedure: Stem Cell Infusion	M.D. Anderson Cancer Center		Interventional	https://ClinicalTrials.gov/show/NCT01079936
	Phase 1|Phase 2	Cannabidiol Expanded Access Study in Medically Refractory Sturge-Weber Syndrome	Sturge-Weber Syndrome	Drug: Cannabidiol	Anne Comi, MD|GW Pharmaceuticals Ltd.|Faneca 66 Foundation|Hugo W. Moser Research Institute at Kennedy Krieger, Inc.		Interventional	https://ClinicalTrials.gov/show/NCT02332655
	Phase 1|Phase 2	A Study to Assess the Safety and Efficacy of MUC1 Peptide Vaccine and hGM-CSF in Patients With MUC1-positive Tumor Malignancies	Multiple Myeloma	Biological: ImMucin, hGM-CSF	Vaxil Therapeutics Ltd.		Interventional	https://ClinicalTrials.gov/show/NCT01232712
	Phase 1|Phase 2	Carfilzomib and Stem Cell Transplant for Plasma Cell Myeloma	Multiple Myeloma|Leukemia, Plasma Cell	Drug: Carfilzomib|Drug: Melphalan|Drug: Filgrastim	National Cancer Institute (NCI)|National Institutes of Health Clinical Center (CC)		Interventional	https://ClinicalTrials.gov/show/NCT01658904
	Phase 1|Phase 2	Ixazomib With Pomalidomide, Clarithromycin and Dexamethasone in Treating Patients With Multiple Myeloma	Myeloma	Drug: Clarithromycin|Drug: Dexamethasone|Drug: Ixazomib Citrate|Drug: Pomalidomide	University of California, Davis|Takeda|Celgene		Interventional	https://ClinicalTrials.gov/show/NCT02542657
	Phase 1|Phase 2	Study of Oprozomib and Dexamethasone, in Combination With Lenalidomide or Oral Cyclophosphamide in Patients With Newly Diagnosed Multiple Myeloma	Multiple Myeloma	Drug: Oprozomib|Drug: Lenalidomide|Drug: Dexamethasone|Drug: Cyclophosphamide	Amgen		Interventional	https://ClinicalTrials.gov/show/NCT01881789
	Phase 1|Phase 2	Cyclophosphamide, Carfilzomib, Thalidomide, and Dexamethasone in Treating Patients With Newly Diagnosed Active Multiple Myeloma	Multiple Myeloma|Stage I Multiple Myeloma|Stage II Multiple Myeloma|Stage III Multiple Myeloma	Drug: carfilzomib|Drug: cyclophosphamide|Drug: thalidomide|Drug: dexamethasone	Mayo Clinic		Interventional	https://ClinicalTrials.gov/show/NCT01057225
	Phase 1|Phase 2	Open-label Study of TH-302 and Dexamethasone With or Without Bortezomib or Pomalidomide in Subjects With Relapsed/Refractory Multiple Myeloma	Multiple Myeloma	Drug: TH-302|Drug: TH-302 and Dexamethasone|Drug: TH-302 Dose Escalation and Dexamethasone in Combination with Bortezomib|Drug: TH-302 Dose Escalation and Dexamethasone in Combination with Pomalidomide	Threshold Pharmaceuticals		Interventional	https://ClinicalTrials.gov/show/NCT01522872
	Phase 1|Phase 2	Bendamustine, Wkly Bortezomib, Lenalidomide and Dexamethasone for Multiple Myeloma	Multiple Myeloma	Drug: Bendamustine|Drug: Bortezomib|Drug: Lenalidomide|Drug: Dexamethasone	Loyola University		Interventional	https://ClinicalTrials.gov/show/NCT01484626
	Phase 1|Phase 2	Induction Therapy for Multiple Myeloma With Carfilzomib, Lenalidomide,Dexamethasone,Panobinostat	Multiple Myeloma	Drug: Panobinostat|Drug: Carfilzomib|Drug: Lenalidomide|Drug: Dexamethasone	H. Lee Moffitt Cancer Center and Research Institute|Novartis|Amgen		Interventional	https://ClinicalTrials.gov/show/NCT02802163
	Phase 1|Phase 2	Study of Ibrutinib in Combination With Pomalidomide and Dexamethasone in Subjects With Relapsed/Refractory Multiple Myeloma	Multiple Myeloma	Drug: Ibrutinib|Drug: Pomalidomide|Drug: Dexamethasone|Drug: Placebo	Pharmacyclics LLC.|Celgene Corporation		Interventional	https://ClinicalTrials.gov/show/NCT02548962
	Phase 1|Phase 2	Velcade, Thalidomide, Dexamethasone and Panobinostat Treatment and Panobinostat Maintenance in Multiple Myeloma	Multiple Myeloma	Drug: Velcade|Drug: Thalidomide|Drug: Dexamethasone|Drug: Panobinostat	Prof Jamie Cavenagh|Myeloma UK|Novartis|University of Leeds		Interventional	https://ClinicalTrials.gov/show/NCT02145715
	Phase 1|Phase 2	Study Testing Radium-223 Dichloride in Relapsed Multiple Myeloma	Multiple Myeloma	Drug: Radium-223 dichloride (Xofigo, BAY88-8223)|Drug: Placebo|Drug: Bortezomib|Drug: Dexamethasone	Bayer		Interventional	https://ClinicalTrials.gov/show/NCT02928029
	Phase 1|Phase 2	Phase 1b/2 Study Testing Radium-223 Dichloride/Bortezomib/Dexamethasone Combination in Relapsed Multiple Myeloma	Multiple Myeloma	Drug: Radium-223 dichloride (Xofigo, BAY88-8223)|Drug: Placebo|Drug: Bortezomib|Drug: Dexamethasone	Bayer		Interventional	https://ClinicalTrials.gov/show/NCT02605356
	Phase 1|Phase 2	Vorinostat in Combination With Bortezomib, Doxorubicin and Dexamethasone (VBDD) in Patients With Refractory or Relapsed Multiple Myeloma (MM)	Multiple Myeloma in Relapse	Drug: Vorinostat|Drug: Bortezomib|Drug: Doxorubicin|Drug: Dexamethasone	University Hospital Freiburg|Merck Sharp & Dohme Corp.|Janssen-Cilag Ltd.		Interventional	https://ClinicalTrials.gov/show/NCT01394354
	Phase 1|Phase 2	Study of Oral IXAZOMIB in Combination With Melphalan and Prednisone in Patients With Newly Diagnosed Multiple Myeloma	Multiple Myeloma	Drug: IXAZOMIB|Drug: Melphalan 9 mg/m2|Drug: Melphalan 6 mg/m2|Drug: Prednisone	Millennium Pharmaceuticals, Inc.|Takeda		Interventional	https://ClinicalTrials.gov/show/NCT01335685
	Phase 1|Phase 2	Lonquek for Autologous Stem Cell Mobilization	Lymphoma|Multiple Myeloma	Drug: Lonquek	Sheba Medical Center		Interventional	https://ClinicalTrials.gov/show/NCT02488382
	Phase 1|Phase 2	Ixazomib Plus Pomalidomide and Dexamethasone in Treating Patients With Relapsed or Relapsed/Refractory Multiple Myeloma	Refractory Plasma Cell Myeloma|Recurrent Plasma Cell Myeloma	Drug: ixazomib citrate|Drug: dexamethasone|Drug: pomalidomide|Other: laboratory biomarker analysis	City of Hope Medical Center|National Cancer Institute (NCI)		Interventional	https://ClinicalTrials.gov/show/NCT02119468
	Phase 1|Phase 2	Selinexor Plus High-Dose Melphalan (HDM) Before Autologous Hematopoietic Cell Transplantation for Multiple Myeloma	Multiple Myeloma	Drug: Selinexor|Drug: Melphalan|Drug: Dexamethasone|Procedure: Autologous Hematopoietic Cell Transplantation (HCT)	H. Lee Moffitt Cancer Center and Research Institute|Karyopharm Therapeutics Inc		Interventional	https://ClinicalTrials.gov/show/NCT02780609
	Phase 1|Phase 2	Melphalan and Bortezomib Prior to Autologous Stem Cell Transplant in Treating Patients With Multiple Myeloma	Plasma Cell Myeloma|Plasmacytosis|Recurrent Plasma Cell Myeloma|Smoldering Plasma Cell Myeloma	Drug: Melphalan|Drug: Bortezomib|Drug: Dexamethasone|Procedure: Autologous Transplant	University of Colorado, Denver		Interventional	https://ClinicalTrials.gov/show/NCT02353572
	Phase 1|Phase 2	Entospletinib and Obinutuzumab in Treating Patients With Relapsed Chronic Lymphocytic Leukemia, Small Lymphocytic Lymphoma, or Non-Hodgkin Lymphoma	Anemia|B-Cell Prolymphocytic Leukemia|Fatigue|Fever|Grade 1 Follicular Lymphoma|Grade 2 Follicular Lymphoma|Grade 3a Follicular Lymphoma|Hairy Cell Leukemia|Lymphadenopathy|Lymphocytosis|Lymphoplasmacytic Lymphoma|Mantle Cell Lymphoma|Marginal Zone Lymphoma|Night Sweats|Recurrent Chronic Lymphocytic Leukemia|Recurrent Small Lymphocytic Lymphoma|Refractory Chronic Lymphocytic Leukemia|Refractory S…	Drug: Entospletinib|Other: Laboratory Biomarker Analysis|Biological: Obinutuzumab|Other: Pharmacological Study	OHSU Knight Cancer Institute|National Cancer Institute (NCI)		Interventional	https://ClinicalTrials.gov/show/NCT03010358
	Phase 1|Phase 2	Ixazomib as a Replacement for Carfilzomib and Bortezomib for Multiple Myeloma Patients	Multiple Myeloma	Drug: Melphalan|Drug: Prednisone|Drug: Cyclophosphamide|Drug: Dexamethasone|Dietary Supplement: Ascorbic acid|Drug: PLD|Drug: Lenalidomide	Oncotherapeutics|Millennium: The Takeda Oncology Company		Interventional	https://ClinicalTrials.gov/show/NCT02206425
	Phase 1|Phase 2	A Dose Finding Study Followed by a Safety and Efficacy Study for Patients With Multiple Myeloma or Lymphoma	Multiple Myeloma|NonHodgkin Lymphoma	Drug: TAS4464	Taiho Oncology, Inc.		Interventional	https://ClinicalTrials.gov/show/NCT02978235
	Phase 1|Phase 2	Romidepsin in Combination With Lenalidomide in Adults With Relapsed or Refractory Lymphomas and Myeloma	Multiple Myeloma|Non-Hodgkin's Lymphoma	Drug: Romidepsin|Drug: Lenalidomide	Memorial Sloan Kettering Cancer Center|Saint Francis/Mount Sinai Regional Cancer Center|Weill Medical College of Cornell University|University of Nebraska|Celgene Corporation|Biologics, Inc.		Interventional	https://ClinicalTrials.gov/show/NCT01755975
	Phase 1|Phase 2	Ipilimumab and Local Radiation Therapy in Treating Patients With Recurrent Melanoma, Non-Hodgkin Lymphoma, Colon, or Rectal Cancer	Adult Nasal Type Extranodal NK/T-cell Lymphoma|Anaplastic Large Cell Lymphoma|Angioimmunoblastic T-cell Lymphoma|Cutaneous B-cell Non-Hodgkin Lymphoma|Extranodal Marginal Zone B-cell Lymphoma of Mucosa-associated Lymphoid Tissue|Hepatosplenic T-cell Lymphoma|Intraocular Lymphoma|Nodal Marginal Zone B-cell Lymphoma|Peripheral T-cell Lymphoma|Recurrent Adult Burkitt Lymphoma|Recurrent Adult Diffuse…	Biological: Ipilimumab|Radiation: Radiation therapy	Stanford University|National Cancer Institute (NCI)		Interventional	https://ClinicalTrials.gov/show/NCT01769222
	Phase 1|Phase 2	Lenalidomide and Combination Chemotherapy (DA-EPOCH-R) in Treating Patients With MYC-Associated B-Cell Lymphomas	Adult Grade III Lymphomatoid Granulomatosis|B-cell Chronic Lymphocytic Leukemia|Contiguous Stage II Adult Diffuse Large Cell Lymphoma|Contiguous Stage II Adult Diffuse Mixed Cell Lymphoma|Contiguous Stage II Adult Diffuse Small Cleaved Cell Lymphoma|Contiguous Stage II Adult Immunoblastic Large Cell Lymphoma|Contiguous Stage II Grade 1 Follicular Lymphoma|Contiguous Stage II Grade 2 Follicular Ly…	Drug: lenalidomide|Drug: etoposide|Drug: prednisone|Drug: vincristine sulfate|Drug: doxorubicin hydrochloride|Drug: cyclophosphamide|Biological: rituximab|Other: quality-of-life assessment|Other: laboratory biomarker analysis	University of Chicago|National Cancer Institute (NCI)		Interventional	https://ClinicalTrials.gov/show/NCT02213913
	Phase 1|Phase 2	Leflunomide in Treating Patients With Relapsed or Refractory Multiple Myeloma	Recurrent Plasma Cell Myeloma|Refractory Plasma Cell Myeloma	Other: Laboratory Biomarker Analysis|Drug: Leflunomide|Other: Pharmacological Study	City of Hope Medical Center|National Cancer Institute (NCI)		Interventional	https://ClinicalTrials.gov/show/NCT02509052
	Phase 1|Phase 2	A Phase I/IIa Study of Human Anti-CD38 Antibody MOR03087 (MOR202) in Relapsed/Refractory Multiple Myeloma	Multiple Myeloma	Drug: MOR03087 phase 1 dose escalation|Drug: MOR03087|Drug: Dexamethasone|Drug: Pomalidomide|Drug: Lenalidomide	MorphoSys AG		Interventional	https://ClinicalTrials.gov/show/NCT01421186
	Phase 1|Phase 2	Lenalidomide/Bortezomib/Dexamethasone & CNTO 328 in Transplant Eligible Newly Diagnosed Multiple Myeloma (MM)	Myeloma	Drug: Lenalidomide|Drug: Bortezomib|Drug: Siltuximab|Drug: Dexamethasone|Behavioral: Questionnaires	M.D. Anderson Cancer Center|Janssen Services, LLC		Interventional	https://ClinicalTrials.gov/show/NCT01531998
	Phase 1|Phase 2	Study of Umbilical Cord Blood-derived Natural Killer Cells in Conjunction With High Dose Chemotherapy and Autologous Stem Cell Transplant for Patients With Multiple Myeloma	Myeloma	Drug: Lenalidomide|Drug: Melphalan|Procedure: NK Cell Infusion|Procedure: Stem Cell Infusion|Drug: G-CSF	M.D. Anderson Cancer Center|Celgene		Interventional	https://ClinicalTrials.gov/show/NCT01729091
	Phase 1|Phase 2	Idasanutlin, Ixazomib Citrate, and Dexamethasone in Treating Patients With Relapsed Multiple Myeloma	Recurrent Plasma Cell Myeloma	Drug: Dexamethasone|Drug: Idasanutlin|Drug: Ixazomib Citrate|Other: Laboratory Biomarker Analysis|Other: Pharmacological Study	Mayo Clinic|National Cancer Institute (NCI)		Interventional	https://ClinicalTrials.gov/show/NCT02633059
	Phase 1|Phase 2	Pomalidomide, Bortezomib, and Dexamethasone in Treating Patients With Relapsed or Refractory Multiple Myeloma	Refractory Multiple Myeloma	Drug: pomalidomide|Drug: bortezomib|Drug: dexamethasone|Other: laboratory biomarker analysis|Other: gene expression analysis	Mayo Clinic|National Cancer Institute (NCI)		Interventional	https://ClinicalTrials.gov/show/NCT01212952
	Phase 1|Phase 2	S1211 Bortezomib, Dexamethasone, and Lenalidomide With or Without Elotuzumab in Treating Patients With Newly Diagnosed High-Risk Multiple Myeloma	DS Stage I Plasma Cell Myeloma|DS Stage II Plasma Cell Myeloma|DS Stage III Plasma Cell Myeloma	Drug: Bortezomib|Drug: Dexamethasone|Biological: Elotuzumab|Other: Laboratory Biomarker Analysis|Drug: Lenalidomide	Southwest Oncology Group|National Cancer Institute (NCI)		Interventional	https://ClinicalTrials.gov/show/NCT01668719
	Phase 1|Phase 2	Bosentan for Severe Mitral Valve Dysfunction	SECONDARY PULMONARY HYPERTENSION|MITRAL STENOSIS|CHILDHOOD RHEUMATOID FEVER|CONGESTIVE HEART FAILURE	Drug: BOSENTAN	General Hospital of Chalkida		Interventional	https://ClinicalTrials.gov/show/NCT01270750
	Phase 1|Phase 2	R-(-)-Gossypol Acetic Acid With Lenalidomide and Dexamethasone in Treating Patients With Relapsed Symptomatic Multiple Myeloma	Recurrent Plasma Cell Myeloma	Drug: Dexamethasone|Other: Laboratory Biomarker Analysis|Drug: Lenalidomide|Other: Pharmacological Study|Drug: R-(-)-Gossypol Acetic Acid	Mayo Clinic|National Cancer Institute (NCI)		Interventional	https://ClinicalTrials.gov/show/NCT02697344
	Phase 1|Phase 2	Vismodegib and Gamma-Secretase/Notch Signalling Pathway Inhibitor RO4929097 in Treating Patients With Advanced or Metastatic Sarcoma	Adult Alveolar Soft Part Sarcoma|Adult Angiosarcoma|Adult Desmoplastic Small Round Cell Tumor|Adult Epithelioid Hemangioendothelioma|Adult Epithelioid Sarcoma|Adult Extraskeletal Myxoid Chondrosarcoma|Adult Extraskeletal Osteosarcoma|Adult Fibrosarcoma|Adult Leiomyosarcoma|Adult Liposarcoma|Adult Malignant Mesenchymoma|Adult Malignant Peripheral Nerve Sheath Tumor|Adult Rhabdomyosarcoma|Adult Syn…	Drug: Gamma-Secretase Inhibitor RO4929097|Other: Laboratory Biomarker Analysis|Other: Pharmacological Study|Drug: Vismodegib	National Cancer Institute (NCI)		Interventional	https://ClinicalTrials.gov/show/NCT01154452
	Phase 1|Phase 2	Combination Chemotherapy and Lenalidomide in Treating Patients With Newly Diagnosed Stage II-IV Peripheral T-cell Non-Hodgkin's Lymphoma	Anaplastic Large Cell Lymphoma, ALK-Negative|Anaplastic Large Cell Lymphoma, ALK-Positive|Hepatosplenic T-Cell Lymphoma|Peripheral T-Cell Lymphoma, Not Otherwise Specified|Stage II Angioimmunoblastic T-cell Lymphoma|Stage II Enteropathy-Associated T-Cell Lymphoma|Stage III Angioimmunoblastic T-cell Lymphoma|Stage III Enteropathy-Associated T-Cell Lymphoma|Stage IV Angioimmunoblastic T-cell Lympho…	Drug: Cyclophosphamide|Drug: Doxorubicin Hydrochloride|Drug: Vincristine Sulfate|Drug: Etoposide|Drug: Prednisone|Drug: Lenalidomide|Procedure: Peripheral Blood Stem Cell Transplantation|Procedure: Autologous Hematopoietic Stem Cell Transplantation|Other: Laboratory Biomarker Analysis	University of Nebraska|National Cancer Institute (NCI)		Interventional	https://ClinicalTrials.gov/show/NCT02561273
	Phase 1|Phase 2	Lenalidomide and Pidilizumab in Treating Patients With Relapsed or Refractory Multiple Myeloma	Multiple Myeloma	Drug: lenalidomide|Biological: pidilizumab|Other: pharmacological study|Other: laboratory biomarker analysis	Yvonne Efebera|CureTech Ltd|Ohio State University Comprehensive Cancer Center		Interventional	https://ClinicalTrials.gov/show/NCT02077959
	Phase 1|Phase 2	Lenalidomide and Dexamethasone With or Without Anakinra in Treating Patients With Early Stage Multiple Myeloma	Indolent Plasma Cell Myeloma|Plasma Cell Myeloma|Smoldering Plasma Cell Myeloma	Biological: Anakinra|Drug: Dexamethasone|Other: Laboratory Biomarker Analysis|Drug: Lenalidomide|Other: Placebo	Mayo Clinic|National Cancer Institute (NCI)		Interventional	https://ClinicalTrials.gov/show/NCT02492750
	Phase 1|Phase 2	Carfilzomib and Melphalan Before Stem Cell Transplant in Treating Patients With Multiple Myeloma	DS Stage I Plasma Cell Myeloma|DS Stage II Plasma Cell Myeloma|DS Stage III Plasma Cell Myeloma|Refractory Plasma Cell Myeloma	Procedure: Autologous Bone Marrow Transplantation|Procedure: Autologous Hematopoietic Stem Cell Transplantation|Drug: Carfilzomib|Other: Laboratory Biomarker Analysis|Drug: Melphalan	Mayo Clinic|National Cancer Institute (NCI)		Interventional	https://ClinicalTrials.gov/show/NCT01842308
	Phase 1|Phase 2	Selinexor and Backbone Treatments of Multiple Myeloma Patients	Multiple Myeloma	Drug: Selinexor|Drug: Dexamethasone|Drug: Lenalidomide|Drug: Pomalidomide|Drug: Bortezomib|Drug: Daratumumab	Karyopharm Therapeutics Inc		Interventional	https://ClinicalTrials.gov/show/NCT02343042
	Phase 1|Phase 2	Ibrutinib, Lenalidomide, and Dexamethasone in Treating Patients With Multiple Myeloma Ineligible for Transplant	Recurrent Plasma Cell Myeloma|Refractory Plasma Cell Myeloma	Drug: Dexamethasone|Drug: Ibrutinib|Other: Laboratory Biomarker Analysis|Drug: Lenalidomide|Other: Pharmacological Study|Other: Quality-of-Life Assessment	Mayo Clinic|National Cancer Institute (NCI)		Interventional	https://ClinicalTrials.gov/show/NCT03015792
	Phase 1|Phase 2	An Open Label, International, Multi-centre, Phase I/IIa Study of Lenalidomide (Revlimid) and Romidepsin (Istodax) for Relapsed /Refractory Hodgkin Lymphoma, Mature T-cell Lymphoma and Multiple Myeloma. (RId Study)	Hodgkin's Lymphoma|Mature T-cell Lymphoma|Multiple Myeloma	Drug: lenalidomide (Revlimid) and romidepsin (Istodax)	Yale University|Peter MacCallum Cancer Centre, Australia		Interventional	https://ClinicalTrials.gov/show/NCT01742793
	Phase 1|Phase 2	Everolimus and Lenalidomide in Treating Patients With Relapsed or Refractory Non-Hodgkin or Hodgkin Lymphoma	Adult Nasal Type Extranodal NK/T-cell Lymphoma|Anaplastic Large Cell Lymphoma|Angioimmunoblastic T-cell Lymphoma|Extranodal Marginal Zone B-cell Lymphoma of Mucosa-associated Lymphoid Tissue|Hepatosplenic T-cell Lymphoma|Nodal Marginal Zone B-cell Lymphoma|Peripheral T-cell Lymphoma|Post-transplant Lymphoproliferative Disorder|Recurrent Adult Burkitt Lymphoma|Recurrent Adult Diffuse Large Cell Ly…	Drug: everolimus|Drug: lenalidomide|Other: laboratory biomarker analysis|Genetic: polymorphism analysis|Other: immunohistochemistry staining method|Genetic: microarray analysis|Genetic: fluorescence in situ hybridization	Mayo Clinic		Interventional	https://ClinicalTrials.gov/show/NCT01075321
	Phase 1|Phase 2	Ixazomib Citrate, Cyclophosphamide, and Dexamethasone in Treating Patients With Previously Untreated Symptomatic Multiple Myeloma	Plasma Cell Myeloma	Drug: Cyclophosphamide|Drug: Dexamethasone|Drug: Ixazomib Citrate|Other: Laboratory Biomarker Analysis|Other: Pharmacological Study|Other: Quality-of-Life Assessment|Other: Questionnaire Administration	Mayo Clinic|National Cancer Institute (NCI)		Interventional	https://ClinicalTrials.gov/show/NCT01864018
	Phase 1|Phase 2	Low-Dose Azacitidine, Lenalidomide, and Low-Dose Dexamethasone in Relapsed or Refractory Multiple Myeloma	Refractory Multiple Myeloma	Drug: azacitidine|Drug: lenalidomide|Drug: dexamethasone|Other: DNA methylation analysis|Other: gene expression analysis|Other: bone marrow aspiration|Other: immunohistochemistry staining method|Other: reverse transcriptase-polymerase chain reaction|Other: flow cytometry	Case Comprehensive Cancer Center|National Cancer Institute (NCI)		Interventional	https://ClinicalTrials.gov/show/NCT01155583
	Phase 1|Phase 2	Bortezomib, Melphalan, and Total-Body Irradiation Before Stem Cell Transplant in Treating Patients With Multiple Myeloma	DS Stage I Plasma Cell Myeloma|DS Stage II Plasma Cell Myeloma|DS Stage III Plasma Cell Myeloma|Refractory Plasma Cell Myeloma	Drug: Bortezomib|Radiation: Total-Body Irradiation|Drug: Melphalan|Procedure: Autologous Bone Marrow Transplantation|Procedure: Autologous Hematopoietic Stem Cell Transplantation|Procedure: Peripheral Blood Stem Cell Transplantation|Other: Laboratory Biomarker Analysis	Mayo Clinic|National Cancer Institute (NCI)		Interventional	https://ClinicalTrials.gov/show/NCT01936090
	Phase 1|Phase 2	Brentuximab Vedotin + Rituximab as Frontline Therapy for Pts w/ CD30+ and/or EBV+ Lymphomas	Adult Grade III Lymphomatoid Granulomatosis|Adult Nasal Type Extranodal NK/T-cell Lymphoma|Anaplastic Large Cell Lymphoma|Angioimmunoblastic T-cell Lymphoma|Contiguous Stage II Adult Burkitt Lymphoma|Contiguous Stage II Adult Diffuse Large Cell Lymphoma|Contiguous Stage II Adult Diffuse Mixed Cell Lymphoma|Contiguous Stage II Adult Diffuse Small Cleaved Cell Lymphoma|Contiguous Stage II Adult Imm…	Drug: brentuximab vedotin|Biological: rituximab|Other: laboratory biomarker analysis	Northwestern University|Seattle Genetics, Inc.		Interventional	https://ClinicalTrials.gov/show/NCT01805037
	Phase 1|Phase 2	Melphalan, Total Marrow Irradiation, and Autologous Stem Cell Transplantation in Treating Patients With High-Risk Multiple Myeloma	Plasma Cell Leukemia in Remission|Plasma Cell Myeloma	Procedure: Autologous Hematopoietic Stem Cell Transplantation|Drug: Cyclophosphamide|Biological: Filgrastim|Other: Laboratory Biomarker Analysis|Drug: Lenalidomide|Procedure: Leukapheresis|Drug: Melphalan|Biological: Palifermin|Radiation: Total Marrow Irradiation	City of Hope Medical Center|National Cancer Institute (NCI)		Interventional	https://ClinicalTrials.gov/show/NCT03100877
	Phase 1|Phase 2	Study of Subcutaneous Versus Intravenous Administration of Bortezomib in Patients With Multiple Myeloma in China	Multiple Myeloma Proved by Laboratory Tests	Other: Subcutaneous bortezomib|Other: Intravenous bortezomib	The First Affiliated Hospital of Soochow University		Interventional	https://ClinicalTrials.gov/show/NCT01812096
	Phase 1|Phase 2	Bortezomib, Rituximab, and Dexamethasone With or Without Temsirolimus in Treating Patients With Untreated or Relapsed Waldenstrom Macroglobulinemia or Relapsed or Refractory Mantle Cell or Follicular Lymphoma	Cognitive Side Effects of Cancer Therapy|Fatigue|Neurotoxicity Syndrome|Recurrent Grade 1 Follicular Lymphoma|Recurrent Grade 2 Follicular Lymphoma|Recurrent Grade 3 Follicular Lymphoma|Recurrent Mantle Cell Lymphoma|Recurrent Marginal Zone Lymphoma|Recurrent Small Lymphocytic Lymphoma|Therapy-Related Toxicity|Waldenstrom Macroglobulinemia	Drug: Bortezomib|Drug: Dexamethasone|Other: Laboratory Biomarker Analysis|Other: Quality-of-Life Assessment|Biological: Rituximab|Drug: Temsirolimus	National Cancer Institute (NCI)		Interventional	https://ClinicalTrials.gov/show/NCT01381692
	Phase 1|Phase 2	Study of Combined Check Point Inhibition After Autologous Hematopoietic Stem Cell Transplantation in Patients at High Risk for Post-transplant Recurrence	Multiple Myeloma|Lymphoma	Drug: Ipilimumab|Drug: Nivolumab	Hackensack University Medical Center		Interventional	https://ClinicalTrials.gov/show/NCT02681302
	Phase 1|Phase 2	Atorvastatin Therapy in Cerebral Cavernous Malformation: A Proof of Concept Phase I/II Trial	Cerebral Cavernous Malformation	Drug: Atorvastatin|Other: Placebo	University of Chicago|Johns Hopkins University		Interventional	https://ClinicalTrials.gov/show/NCT02603328
	Phase 1|Phase 2	PCD Versus RCD for the Treatment of Patients With Waldenstrom's Macroglobulinemia	Treatment	Drug: rituximab /Dexamethasone/cyclophosphamide|Drug: Velcade/Dexamethasone/cyclophosphamide	The First Affiliated Hospital of Soochow University		Interventional	https://ClinicalTrials.gov/show/NCT02971982
	Phase 1|Phase 2	Study of Lenalidomide in Relapse/Refractory Waldenstrom Macroglobulinemia	Waldenstrom Macroglobulinemia	Drug: Revlimid	University Hospital, Lille|Celgene Corporation		Interventional	https://ClinicalTrials.gov/show/NCT02302469
	Phase 1|Phase 2	Lenalidomide in Treating Patients With AIDS-Associated Kaposi's Sarcoma	AIDS-Related Kaposi Sarcoma|Recurrent Kaposi Sarcoma	Drug: Lenalidomide	National Cancer Institute (NCI)		Interventional	https://ClinicalTrials.gov/show/NCT01057121
	Phase 1|Phase 2	Everolimus, Bortezomib and/or Rituximab in Patients With Relapsed/Refractory Waldenstrom's Macroglobulinemia	Waldenstrom's Macroglobulinemia	Drug: Everolimus|Drug: Rituximab|Drug: Bortezomib	Dana-Farber Cancer Institute|Novartis|Millennium Pharmaceuticals, Inc.		Interventional	https://ClinicalTrials.gov/show/NCT01125293
	Phase 1|Phase 2	Extension Study of IMO-8400 in Patients With WaldenstrÃ¶m's Macroglobulinemia Who Completed Study 8400-401	Waldenstrom's Macroglobulinemia	Drug: IMO-8400	Idera Pharmaceuticals, Inc.		Interventional	https://ClinicalTrials.gov/show/NCT02363439
	Phase 1|Phase 2	Phase 1/2 Dose Escalation Study in Patients With Relapsed or Refractory Waldenstrom's Macroglobulinemia	Waldenstrom's Macroglobulinemia	Drug: IMO-8400	Idera Pharmaceuticals, Inc.		Interventional	https://ClinicalTrials.gov/show/NCT02092909
	Phase 1|Phase 2	Selinexor Plus Combination Chemotherapy in Treating Patients With Advanced B Cell Non-Hodgkin Lymphoma	Diffuse Large B-Cell Lymphoma|Recurrent B-Cell Non-Hodgkin Lymphoma|Recurrent Extranodal Marginal Zone Lymphoma|Recurrent Follicular Lymphoma|Recurrent Indolent Adult Non-Hodgkin Lymphoma|Recurrent Mantle Cell Lymphoma|Recurrent Marginal Zone Lymphoma|Recurrent Waldenstrom Macroglobulinemia|Refractory B-Cell Non-Hodgkin Lymphoma|Refractory Extranodal Marginal Zone Lymphoma|Refractory Follicular L…	Drug: Selinexor	Barbara Ann Karmanos Cancer Institute|National Cancer Institute (NCI)		Interventional	https://ClinicalTrials.gov/show/NCT03147885
	Phase 1|Phase 2	Study of Safety,Efficacy and Pharmacokinetics of CT-1530 in Patients With Relapsed or Refractory B Cell Non-Hodgkin Lymphoma, Chronic Lymphocytic Leukemia, and Waldenstrom's Macroglobulinemia	Relapsed or Refractory B Cell Non-Hodgkin Lymphoma|Chronic Lymphocytic Leukemia|Waldenstrom's Macroglobulinemia|Mantle Zone Lymphoma Refractory/Recurrent|Follicle Centre Lymphoma Diffuse|Diffuse Large B Cell Lymphoma	Drug: CT-1530	Centaurus Biopharma Co., Ltd.		Interventional	https://ClinicalTrials.gov/show/NCT02981745
	Phase 1|Phase 2	Study of the Efficacy and Safety of Ublituximab in Patients With Relapsed or Refractory B-cell Non-Hodgkin Lymphoma	Non-Hodgkins Lymphoma|B-cell Lymphoma|Waldenstrom's Macroglobulinemia|Marginal Zone Lymphoma|Chronic Lymphocytic Leukemia|Small Lymphocytic Lymphoma|Primary Central Nervous System Lymphoma	Drug: Ublituximab	TG Therapeutics, Inc.		Interventional	https://ClinicalTrials.gov/show/NCT01647971
	Phase 1|Phase 2	Early Phase Evaluation of ABC294640 in Patients With Refractory/Relapsed Diffuse Large B-cell Lymphoma or Kaposi Sarcoma	Diffuse Large B Cell Lymphoma|Kaposi Sarcoma	Drug: ABC294640	RedHill Biopharma Limited|Louisiana State University Health Sciences Center in New Orleans|Apogee Biotechnology Corporation		Interventional	https://ClinicalTrials.gov/show/NCT02229981
	Phase 1|Phase 2	A Study of Selumetinib in Patients With Kaposi's Sarcoma	AIDS-related Kaposi's Sarcoma	Drug: Selumetinib	Sheffield Teaching Hospitals NHS Foundation Trust|University of Birmingham|AstraZeneca|Thermo Fisher Scientific|Cancer Research UK|University of Sheffield		Interventional	https://ClinicalTrials.gov/show/NCT01752569
	Phase 1|Phase 2	LAM Pilot Study With Imatinib Mesylate	Lymphangioleiomyomatosis	Drug: Imatinib Mesylate 400Mg Capsule|Drug: Placebo - Capsule	Medical University of South Carolina|Columbia University		Interventional	https://ClinicalTrials.gov/show/NCT03131999
	Phase 1|Phase 2	Lenalidomide and Temsirolimus in Treating Patients With Relapsed or Refractory Hodgkin Lymphoma or Non-Hodgkin Lymphoma	AIDS-Related Hodgkin Lymphoma|Recurrent Adult Diffuse Large Cell Lymphoma|Recurrent Adult Hodgkin Lymphoma|Recurrent Follicular Lymphoma|Recurrent Lymphoplasmacytic Lymphoma|Recurrent Marginal Zone Lymphoma|Recurrent T-Cell Non-Hodgkin Lymphoma|Waldenstrom Macroglobulinemia	Other: Laboratory Biomarker Analysis|Drug: Lenalidomide|Drug: Temsirolimus	National Cancer Institute (NCI)		Interventional	https://ClinicalTrials.gov/show/NCT01076543
	Phase 1|Phase 2	Bevacizumab With or Without Anti-Endoglin Monoclonal Antibody TRC105 in Treating Patients With Recurrent Glioblastoma Multiforme	Adult Anaplastic Astrocytoma|Adult Anaplastic Oligodendroglioma|Adult Giant Cell Glioblastoma|Adult Glioblastoma|Adult Gliosarcoma|Adult Mixed Glioma|Recurrent Adult Brain Neoplasm	Biological: Anti-Endoglin Chimeric Monoclonal Antibody TRC105|Biological: Bevacizumab|Other: Laboratory Biomarker Analysis|Other: Pharmacological Study|Other: Quality-of-Life Assessment	National Cancer Institute (NCI)		Interventional	https://ClinicalTrials.gov/show/NCT01648348
	Phase 1|Phase 2	QUILT-3.020: A Study of ALT-801 in Patients With Relapsed or Refractory Multiple Myeloma	Relapsed or Refractory Multiple Myeloma	Biological: ALT-801	Altor Bioscience Corporation|National Cancer Institute (NCI)		Interventional	https://ClinicalTrials.gov/show/NCT01670994
	Phase 1|Phase 2	Rituximab, Romidepsin, and Lenalidomide in Treating Patients With Recurrent or Refractory B-cell Non-Hodgkin Lymphoma	B-cell Adult Acute Lymphoblastic Leukemia|Extranodal Marginal Zone B-cell Lymphoma of Mucosa-associated Lymphoid Tissue|Intraocular Lymphoma|Nodal Marginal Zone B-cell Lymphoma|Recurrent Adult Acute Lymphoblastic Leukemia|Recurrent Adult Burkitt Lymphoma|Recurrent Adult Diffuse Large Cell Lymphoma|Recurrent Adult Diffuse Mixed Cell Lymphoma|Recurrent Adult Diffuse Small Cleaved Cell Lymphoma|Recu…	Biological: rituximab|Drug: lenalidomide|Drug: romidepsin|Other: laboratory biomarker analysis	Mayo Clinic|National Cancer Institute (NCI)		Interventional	https://ClinicalTrials.gov/show/NCT02281279
	Phase 1|Phase 2	Nivolumab and Lenalidomide in Treating Patients With Relapsed or Refractory Non-Hodgkin or Hodgkin Lymphoma	Grade 3a Follicular Lymphoma|Recurrent Burkitt Lymphoma|Recurrent Diffuse Large B-Cell Lymphoma|Recurrent Follicular Lymphoma|Recurrent Grade 1 Follicular Lymphoma|Recurrent Grade 2 Follicular Lymphoma|Recurrent Lymphoplasmacytic Lymphoma|Recurrent Mantle Cell Lymphoma|Recurrent Marginal Zone Lymphoma|Recurrent Waldenstrom Macroglobulinemia|Refractory Burkitt Lymphoma|Refractory Diffuse Large B-C…	Other: Laboratory Biomarker Analysis|Drug: Lenalidomide|Biological: Nivolumab	Kami Maddocks|Bristol-Myers Squibb|Ohio State University Comprehensive Cancer Center		Interventional	https://ClinicalTrials.gov/show/NCT03015896
	Phase 1|Phase 2	Vaccination With Peptides From Anti-apoptotic Proteins in Relapsed Multiple Myeloma	Relapsed Multiple Myeloma	Biological: peptides derived from antiapoptotic proteins	Herlev Hospital|Odense University Hospital		Interventional	https://ClinicalTrials.gov/show/NCT01272466
	Phase 1|Phase 2	A Phase I/II Study of BI-505 in Conjunction With Autologous Stem Cell Transplant in Multiple Myeloma	Multiple Myeloma	Biological: BI-505|Other: High dose melphalan|Other: Autologous stem cell transplantation	BioInvent International AB		Interventional	https://ClinicalTrials.gov/show/NCT02756728
	Phase 1|Phase 2	Study of Palifermin (Kepivance) in Persons Undergoing Unrelated Donor Allogeneic Hematopoietic Cell Transplantation	Myelodysplastic Syndrome|Hodgkin's Lymphoma|Non-Hodgkin's Lymphoma|Acute Leukemia|Multiple Myeloma	Biological: Rituximab|Drug: Conditioning Chemotherapy|Drug: TMS|Drug: FLAG|Drug: EPOCH-F|Procedure: Hematopoietic Stem Cell Transplant|Drug: Palifermin	National Cancer Institute (NCI)|National Institutes of Health Clinical Center (CC)		Interventional	https://ClinicalTrials.gov/show/NCT02356159
	Phase 1|Phase 2	Shorter Course Tacrolimus After Nonmyeloablative, Related Donor BMT With High-dose Posttransplantation Cyclophosphamide	Hodgkin's Lymphoma|Leukemia|Myelodysplastic Syndrome(MDS)|Multiple Myeloma|Non Hodgkin's Lymphoma	Procedure: Bone Marrow Transplant	Sidney Kimmel Comprehensive Cancer Center		Interventional	https://ClinicalTrials.gov/show/NCT01342289
	Phase 1	A Phase I Study of Pazopanib as a Single Agent for Children With Refractory Solid Tumors	Sarcoma|Neuroblastoma|Wilms Tumor|Osteosarcoma|Brain Tumor	Drug: Pazopanib (GW786034)	National Cancer Institute (NCI)|National Institutes of Health Clinical Center (CC)		Interventional	https://ClinicalTrials.gov/show/NCT01130623
	Phase 1	A Study of Ramucirumab (LY3009806) in Children With Refractory Solid Tumors	Pediatric Solid Tumor|Refractory Tumor|Recurrent Tumor|CNS Malignancies	Drug: Ramucirumab	Eli Lilly and Company|Children's Oncology Group		Interventional	https://ClinicalTrials.gov/show/NCT02564198
	Phase 1	Pazopanib in Combination With Capecitabine in Patients With Metastatic Breast Cancer	Metastatic Breast Cancer	Drug: Pazopanib plus capecitabine	German Breast Group		Interventional	https://ClinicalTrials.gov/show/NCT01498458
	Phase 1	Dasatinib in Combination With Bevacizumab to Treat Advanced Solid Tumors	Solid Tumors	Drug: Bevacizumab|Drug: Dasatinib	National Cancer Institute (NCI)|National Institutes of Health Clinical Center (CC)		Interventional	https://ClinicalTrials.gov/show/NCT01445509
	Phase 1	A Study of Intravenous Aflibercept With Docetaxel in Chinese Patients With Solid Tumors	Neoplasm Malignant	Drug: Aflibercept (AVE0005)|Drug: Docetaxel (XRP6976)	Sanofi|Regeneron Pharmaceuticals		Interventional	https://ClinicalTrials.gov/show/NCT01148615
	Phase 1	Study of Axitinib and Temsirolimus in Solid Tumors	Cancer	Drug: Axitinib|Drug: Temsirolimus	Emory University|Pfizer		Interventional	https://ClinicalTrials.gov/show/NCT01529138
	Phase 1	Phase I Clinical Study Combining L19-IL2 With SABR in Patients With Oligometastatic Solid Tumor	Solid Tumour	Drug: L19-IL2	Maastricht Radiation Oncology		Interventional	https://ClinicalTrials.gov/show/NCT02086721
	Phase 1	Intrapleural Bevacizumab After Pleural Drainage in the Context of Breast Cancer	Pleural Effusion, Malignant|Breast Cancer	Drug: Bevacizumab	Institut Curie|Henri Mondor University Hospital		Interventional	https://ClinicalTrials.gov/show/NCT02250118
	Phase 1	A Study of TRC105 in Combination With Paclitaxel/Carboplatin and Bevacizumab in Non-Squamous Cell Lung Cancer	Lung Cancer	Drug: TRC105	University of Alabama at Birmingham|Tracon Pharmaceuticals Inc.		Interventional	https://ClinicalTrials.gov/show/NCT02429843
	Phase 1	Safety Study of Increasing Doses of CKD-516 in Patients With Advanced Solid Cancers	Unspecified Adult Solid Tumor, Protocol Specific	Drug: CKD-516 inj.	Chong Kun Dang Pharmaceutical		Interventional	https://ClinicalTrials.gov/show/NCT01560325
	Phase 1	Pilot Study of Intra-Arterial Cisplatin With IV Thiosulfate in Patients With Lung Cancer or Lung Metastases	Lung Neoplasms|Neoplasm Metastasis	Drug: Cisplatin, Thiosulfate	University of California, San Diego		Interventional	https://ClinicalTrials.gov/show/NCT01114958
	Phase 1	A Study of Fluzoparib Given in Combination With Apatinib in Ovarian or Breast Cancer Patients	Ovarian Cancer|Triple Negative Breast Cancer	Drug: Fluzoparib|Drug: Apatinib	Jiangsu HengRui Medicine Co., Ltd.|Beijing Cancer Hospital		Interventional	https://ClinicalTrials.gov/show/NCT03075462
	Phase 1	NOV120401 (CKD-516 Tablet) for Advanced Solid Tumors	Advanced Refractory Solid Tumors	Drug: NOV120401	National OncoVenture|Chong Kun Dang Pharmaceutical		Interventional	https://ClinicalTrials.gov/show/NCT02300467
	Phase 1	Pazopanib and Everolimus in PI3KCA Mutation Positive/PTEN Loss Patients	Advanced Cancers|Solid Tumors	Drug: Pazopanib|Drug: Everolimus	M.D. Anderson Cancer Center|GlaxoSmithKline|National Comprehensive Cancer Network		Interventional	https://ClinicalTrials.gov/show/NCT01430572
	Phase 1	A Study of Irinotecan, Levofolinate, and 5-Fluorouracil (FOLFIRI) Plus Ramucirumab (IMC-1121B)	Colorectal Carcinoma	Biological: Ramucirumab (IMC-1121B)|Drug: Irinotecan|Drug: levofolinate|Drug: 5-Fluorouracil (5-FU)	Eli Lilly and Company		Interventional	https://ClinicalTrials.gov/show/NCT01286818
	Phase 1	A Study of OMP-305B83 in Subjects With Metastatic Colorectal Cancer	Metastatic Colorectal Cancer	Drug: OMP-305B83|Drug: FOLFIRI	OncoMed Pharmaceuticals, Inc.		Interventional	https://ClinicalTrials.gov/show/NCT03035253
	Phase 1	Visualization of Rectal Cancer During Endoscopy, Using a Fluorescent Tracer	Rectal Cancer	Drug: Bevacizumab-IRDye800CW|Device: NIR fluorescence endoscopy	University Medical Center Groningen|Dutch Cancer Society		Interventional	https://ClinicalTrials.gov/show/NCT01972373
	Phase 1	A Dose-Escalation Study of the Safety and Pharmacokinetics of MOXR0916 and Atezolizumab With or Without Bevacizumab in Participants With Locally Advanced or Metastatic Solid Tumors	Solid Tumor	Drug: Atezolizumab (MPDL3280A) [TECENTRIQ], an engineered anti-PDL1 antibody|Drug: Bevacizumab, a recombinant humanised anti-VEGF (vascular endothelial growth factor) monoclonal antibody|Drug: MOXR0916, a humanized agonist anti-OX40 monoclonal antibody	Genentech, Inc.		Interventional	https://ClinicalTrials.gov/show/NCT02410512
	Phase 1	A Phase 1b Study of OMP-305B83 Plus Paclitaxel in Subjects With Ovarian, Peritoneal or Fallopian Tube Cancer	Cancer Ovaries|Cancer Peritoneal|Cancer, Fallopian Tube	Drug: OMP-305B83|Drug: Paclitaxel	OncoMed Pharmaceuticals, Inc.		Interventional	https://ClinicalTrials.gov/show/NCT03030287
	Phase 1	Ipilimumab and Lenalidomide in Advanced Cancer	Advanced Cancers	Drug: Ipilimumab|Drug: Lenalidomide	M.D. Anderson Cancer Center		Interventional	https://ClinicalTrials.gov/show/NCT01750983
	Phase 1	Phase I Study of Sulfatinib(HMPL-012) in Patients With Advanced Solid Tumors	Tumor	Drug: Sulfatinib	Hutchison Medipharma Limited		Interventional	https://ClinicalTrials.gov/show/NCT02133157
	Phase 1	Nivolumab in Combination With Plinabulin in Patients With Metastatic Non-Small Cell Lung Cancer (NSCLC)	Non-small Cell Lung Cancer Metastatic	Drug: Nivolumab + Plinabulin	Lyudmila Bazhenova, M.D.|BeyondSpring Pharmaceuticals Inc.|University of California, San Diego		Interventional	https://ClinicalTrials.gov/show/NCT02812667
	Phase 1	A Phase I Study of TAS-102 in Patients With Advanced Gastrointestinal Tumors.	Advanced Gastrointestinal Tumors	Drug: TAS-102|Drug: CPT-11|Drug: Bevacizumab	Taiho Oncology, Inc.		Interventional	https://ClinicalTrials.gov/show/NCT01916447
	Phase 1	Pazopanib and ARQ 197 for Advanced Solid Tumors	Sarcoma|Stomach Neoplasms|Neoplasms	Drug: Pazopanib|Drug: ARQ 197	National Cancer Institute (NCI)|National Institutes of Health Clinical Center (CC)		Interventional	https://ClinicalTrials.gov/show/NCT01468922
	Phase 1	An Open-Labeled Pilot Study of Biomarker Response Following Short-Term Exposure to Metformin	Colorectal Carcinoma	Drug: Metformin ER	M.D. Anderson Cancer Center		Interventional	https://ClinicalTrials.gov/show/NCT01816659
	Phase 1	Temsirolimus and Pazopanib in Patients With Advanced Solid Tumors	Solid Tumors	Drug: Temsirolimus, Pazopanib	University of California, Davis|GlaxoSmithKline|Pfizer		Interventional	https://ClinicalTrials.gov/show/NCT01072890
	Phase 1	Gastric In Vivo Study	Gastric Cancer	Drug: Proflavine Hemisulphate salt|Procedure: White-light examination|Procedure: Imaging with High Resolution Microendoscope	Susana Gonzalez|William Marsh Rice University|Icahn School of Medicine at Mount Sinai		Interventional	https://ClinicalTrials.gov/show/NCT02207959
	Phase 1	Study of Nintedanib Plus Bevacizumab in Advanced Solid Tumors	Renal Cell Carcinoma|Colorectal Adenocarcinoma|Non-squamous Non-small Cell Lung Cancer|Platinum-refractory Ovarian Carcinoma|Cervical Carcinoma	Drug: Nintedanib|Drug: Bevacizumab	University of Alabama at Birmingham|Boehringer Ingelheim		Interventional	https://ClinicalTrials.gov/show/NCT02835833
	Phase 1	Phase I Study of Fruquintinib(HMPL-013) in Patients With Advanced Solid Tumors	Tumor	Drug: Fruquintinib	Hutchison Medipharma Limited|Fudan University		Interventional	https://ClinicalTrials.gov/show/NCT01645215
	Phase 1	A Study of Tafetinib in Chinese Patients With Advanced Solid Tumor	Neoplasms	Drug: tafetinib	Nanjing Yoko Biomedical Co., Ltd.		Interventional	https://ClinicalTrials.gov/show/NCT02717741
	Phase 1	Anakinra or Denosumab and Everolimus in Advanced Cancer	Advanced Cancers	Drug: Everolimus|Drug: Anakinra|Drug: Denosumab	M.D. Anderson Cancer Center		Interventional	https://ClinicalTrials.gov/show/NCT01624766
	Phase 1	A Study of Gemcitabine and Demcizumab (OMP-21M18) With or Without AbraxaneÂ® as 1st-line Treatment in Subjects With Locally Advanced or Metastatic Pancreatic Cancer	Pancreatic Cancer	Drug: Demcizumab|Drug: AbraxaneÂ®|Drug: Gemcitabine	OncoMed Pharmaceuticals, Inc.|Novotech (Australia) Pty Limited		Interventional	https://ClinicalTrials.gov/show/NCT01189929
	Phase 1	EUS-guided Intratumoral Gemcitabine in Locally Advanced Unresectable Pancreatic Cancer	Pancreatic Adenocarcinoma	Drug: Gemcitabine	University of Tehran		Interventional	https://ClinicalTrials.gov/show/NCT01834170
[truncated: 498 more rows]

## Sheet: Table S2
		Table S2: Interventional or observational Clinical Trials related to Vascular Endothelial Growth Factor, in Oncology, from 1/1/2010 to 5/1/2017
[truncated: 234 more rows]

## Sheet: Table S3
Phase	Title	Conditions	Interventions	Sponsor/Collaborators
[truncated: 65 more rows]
